# Supplementary material
Source: publisher figshare collection journal article supplement (https://gsapubs.figshare.com/ndownloader/files/38068086)
Supplement: Supplementary file 1 [file 38068086]

## Sheet: Table S1
Table S1. Summary chemical composition data of representative minerals of mafic granulites and amphibolites in the Chengde Complex.
Garnet	Point	SiO2	TiO2	Al2O3	FeOT	MnO	MgO	CaO	Na2O	K2O	Cr2O3	Sum	Si	Ti	Al	Fe2+	Fe3+	Mn	Mg	Ca	Na	K	Cr	XPrp	XAlm	XGrs	XSps	Mg#	Fe#
Matrix-type	CD03G2-Line1-01	38.118	0.01	20.241	26.732	1.733	4.331	8.398	0	0	0.007	99.57	3.01136	0.00059424	1.88461	1.67507	0.0910524	0.115962	0.510069	0.710856	0	0	0.000437229	0.169348	0.55614	0.236012	0.0385006	0.233427	0.766573
	CD03G2-Line1-02	37.776	0.016	20.145	25.936	1.663	4.401	8.925	0.004	0	0.028	98.894	2.99862	0.000955333	1.88464	1.60666	0.115066	0.111811	0.520793	0.759079	0.000615619	0	0.00175729	0.173694	0.53585	0.253166	0.0372908	0.244796	0.755204
	CD03G2-Line1-03	38.321	0.079	20.342	25.281	0.824	4.218	10.065	0	0.023	0	99.153	3.02644	0.00469301	1.89341	1.62308	0.0466437	0.0551198	0.496604	0.851691	0	0.0023173	0	0.164085	0.536291	0.281411	0.0182124	0.234282	0.765718
	CD03G2-Line1-04	37.902	0.015	20.443	25.335	0.84	4.302	10.465	0.001	0.002	0	99.305	2.98629	0.000888976	1.89832	1.54166	0.127683	0.0560575	0.505299	0.883449	0.000152762	0.000201029	0	0.169196	0.516216	0.295817	0.0187705	0.246853	0.753147
	CD03G2-Line1-05	38.016	0.075	20.261	25.531	0.637	4.088	10.585	0	0.002	0.04	99.235	3.00189	0.00445471	1.88558	1.58656	0.0994214	0.0426043	0.481225	0.895557	0	0.000201473	0.00249728	0.160091	0.527807	0.297928	0.0141733	0.232725	0.767275
	CD03G2-Line1-06	38.013	0.053	20.269	25.579	0.633	4.028	10.916	0.01	0.004	0	99.505	2.99332	0.00313925	1.88109	1.55654	0.127918	0.0422192	0.472845	0.920996	0.00152675	0.000401828	0	0.158005	0.52013	0.307758	0.0141079	0.232999	0.767001
	CD03G2-Line1-07	37.58	0.057	20.068	25.688	0.51	3.835	11.067	0	0.019	0.038	98.862	2.982	0.00340217	1.87677	1.5527	0.151956	0.0342773	0.453655	0.940924	0	0.00192337	0.00238404	0.152153	0.520769	0.315581	0.0114964	0.226108	0.773892
	CD03G2-Line1-08	37.922	0.082	20.076	25.41	0.512	3.548	11.434	0	0.01	0.009	99.003	3.00704	0.00489093	1.87621	1.58466	0.100373	0.0343877	0.419412	0.971448	0	0.0010116	0.000564247	0.139344	0.526482	0.32275	0.0114248	0.209279	0.790721
	CD03G2-Line1-09	38.25	0.026	19.719	26.087	0.491	3.374	11.499	0	0.024	0.034	99.504	3.02521	0.00154678	1.83808	1.61677	0.108693	0.0328921	0.397812	0.974446	0	0.00242155	0.00212609	0.131642	0.535014	0.32246	0.0108845	0.197467	0.802533
	CD03G2-Line1-10	37.742	0.03	20.045	25.128	0.486	3.235	11.709	0.018	0	0.082	98.475	3.01084	0.00180017	1.88463	1.58869	0.087703	0.0328386	0.384721	1.00082	0.00278408	0	0.00517197	0.127939	0.528319	0.332822	0.0109204	0.194952	0.805048
	CD03G2-Line1-11	38.15	0.113	19.798	25.649	0.489	3.06	11.875	0	0.015	0.037	99.186	3.0288	0.00674813	1.85248	1.62732	0.0756329	0.0328828	0.362164	1.01014	0	0.00151924	0.0023225	0.119427	0.536625	0.333105	0.0108435	0.182039	0.817961
	CD03G2-Line1-12	37.948	0.059	20.141	25.371	0.531	2.89	11.915	0	0	0	98.855	3.02158	0.00353368	1.89009	1.62975	0.0596796	0.0358117	0.343046	1.01651	0	0	0	0.113399	0.538738	0.336024	0.0118381	0.173888	0.826112
	CD03G2-Line1-13	37.815	0.025	20.099	25.23	0.596	2.847	12.165	0.021	0.023	0.019	98.84	3.01045	0.00149705	1.88581	1.58507	0.0946647	0.0401883	0.337881	1.03766	0.00324141	0.0023359	0.00119592	0.112597	0.528217	0.345793	0.0133925	0.17571	0.82429
	CD03G2-Line1-14	37.422	0.073	19.94	26.033	0.588	2.6	12.231	0	0	0	98.887	2.98696	0.00438283	1.87579	1.5962	0.141529	0.0397525	0.309374	1.04601	0	0	0	0.103423	0.533607	0.34968	0.0132892	0.162352	0.837648
	CD03G2-Line1-15	37.522	0.047	20.072	25.776	0.726	2.57	12.297	0	0	0.003	99.013	2.98998	0.00281715	1.88508	1.58858	0.129144	0.0490009	0.305298	1.04992	0	0	0.000189009	0.102011	0.530802	0.350814	0.0163729	0.161202	0.838798
	CD03G2-Line1-16	37.195	0.099	20.186	25.864	0.73	2.431	12.27	0	0.002	0	98.777	2.97318	0.00595252	1.9017	1.58873	0.140244	0.0494247	0.289687	1.05088	0	0.00020395	0	0.0972523	0.533359	0.352796	0.0165926	0.154219	0.845781
	CD03G2-Line1-17	37.343	0.131	20.11	25.742	0.9	2.356	12.133	0.016	0.017	0	98.748	2.98751	0.00788318	1.89613	1.60497	0.11729	0.0609857	0.280986	1.04002	0.0024818	0.00173503	0	0.0940708	0.537325	0.348187	0.0204173	0.148989	0.851011
	CD03G2-Line1-18	37.524	0.067	19.838	25.857	0.966	2.269	12.222	0	0.007	0	98.75	3.00541	0.00403645	1.87262	1.62273	0.1092	0.0655326	0.270918	1.04884	0	0.00071524	0	0.0900653	0.539466	0.348682	0.021786	0.143067	0.856933
	CD03G2-Line1-19	37.043	0.061	20.253	25.73	0.973	2.146	12.263	0.004	0.004	0.009	98.486	2.97359	0.00368327	1.91611	1.5975	0.129809	0.0661565	0.256811	1.05474	0.00062256	0.000409631	0.00057121	0.0863169	0.536938	0.354509	0.0222359	0.138494	0.861506
	CD03G2-Line1-20	37.592	0.092	20.214	25.528	1.089	2.108	12.649	0.022	0.018	0.019	99.331	2.99145	0.00550685	1.89581	1.58455	0.114314	0.0734005	0.250072	1.07849	0.00339434	0.00182733	0.00119541	0.0837338	0.530569	0.36112	0.0245773	0.136307	0.863693
	CD03G2-Line1-21	37.804	0.028	19.794	25.916	1.151	1.979	12.378	0	0.005	0.006	99.061	3.02354	0.00168448	1.86581	1.64956	0.0838591	0.0779721	0.235957	1.06072	0	0.000510161	0.00037941	0.0780227	0.54545	0.350744	0.0257826	0.125142	0.874858
	CD03G2-Line1-22	37.729	0.024	20.192	25.371	1.184	1.981	12.928	0	0.019	0.004	99.432	3.00039	0.00143563	1.89251	1.58181	0.105505	0.0797517	0.234853	1.10156	0	0.00192759	0.000251502	0.0783372	0.527627	0.367434	0.0266019	0.129277	0.870723
	CD03G2-Line1-23	37.501	0.074	19.865	25.71	1.222	2.012	12.371	0.017	0	0.032	98.804	3.00556	0.00446112	1.87641	1.61906	0.10416	0.0829543	0.240392	1.06233	0.00264167	0	0.00202774	0.0800041	0.538836	0.353553	0.0276078	0.129281	0.870719
	CD03G2-Line1-24	37.738	0.041	20.178	24.533	1.373	1.858	13.41	0	0.011	0.052	99.194	3.00633	0.00245681	1.89449	1.54864	0.0857848	0.0926431	0.220654	1.14462	0	0.00111791	0.00327521	0.0733911	0.515088	0.380707	0.0308138	0.124713	0.875287
	CD03G2-Line1-25	37.279	0.038	20.054	24.491	1.333	1.785	13.48	0.004	0	0.053	98.517	2.99108	0.00229338	1.89636	1.52918	0.114152	0.0905898	0.213506	1.15885	0.000622258	0	0.00336216	0.071356	0.511069	0.387299	0.030276	0.122515	0.877485
	CD03G2-Line1-26	37.883	0.01	20.071	24.661	1.633	1.902	12.345	0	0.015	0.04	98.56	3.0408	0.000603773	1.89876	1.638	0.0174286	0.111024	0.227595	1.06172	0	0.00153601	0.00253853	0.0749079	0.539111	0.34944	0.0365409	0.121996	0.878004
	CD03G2-Line1-27	37.709	0	20.136	25.77	1.705	2.017	12.239	0	0.007	0.046	99.629	2.99868	0	1.88718	1.6005	0.113281	0.11484	0.239111	1.04281	0	0.000710136	0.00289215	0.0797765	0.533988	0.34792	0.0383151	0.129979	0.870021
	CD03G2-Line1-28	37.4	0	19.743	25.438	1.626	1.977	12.253	0	0.008	0.053	98.498	3.00863	0	1.87183	1.60299	0.10835	0.110791	0.23709	1.05612	0	0.000821006	0.00337095	0.0788462	0.533088	0.351221	0.0368444	0.128848	0.871152
	CD03G2-Line1-29	37.613	0	19.947	25.35	1.78	2.065	12.087	0.012	0.009	0.026	98.889	3.01163	0	1.88234	1.60192	0.095534	0.120717	0.246486	1.03694	0.00186291	0.000919316	0.00164595	0.0819962	0.532895	0.344951	0.0401578	0.133351	0.866649
	CD03G2-Line1-30	37.184	0.066	20.028	25.872	1.736	1.981	12.134	0.004	0	0.001	99.006	2.97747	0.00397525	1.8901	1.58495	0.14757	0.117741	0.236474	1.04104	0.000621008	0	6.33097e-05	0.0793484	0.531825	0.349319	0.0395076	0.12983	0.87017
	CD03G2-Line1-31	37.457	0.048	19.79	25.836	1.736	1.974	11.857	0.016	0	0	98.714	3.00945	0.00290084	1.87394	1.63208	0.103858	0.118138	0.236434	1.02071	0.00249241	0	0	0.0786183	0.542696	0.339403	0.0392828	0.126535	0.873465
	CD03G2-Line1-32	37.538	0.08	20.133	26.11	1.773	2.007	11.888	0.016	0	0.022	99.567	2.98984	0.00479288	1.88991	1.61726	0.121901	0.119611	0.238305	1.01452	0.00247083	0	0.00138541	0.0797088	0.540945	0.339338	0.0400078	0.128427	0.871573
	CD03G2-Line1-33	37.551	0.104	20.128	25.791	1.859	1.964	11.703	0	0	0.003	99.103	3.00515	0.00626049	1.89846	1.64759	0.0785188	0.126011	0.234312	1.0035	0	0	0.000189821	0.0778081	0.547117	0.333231	0.0418446	0.124508	0.875492
	CD03G2-Line1-34	36.684	0.126	20.014	26.003	1.887	1.988	11.618	0	0.001	0.004	98.325	2.96056	0.00764887	1.90365	1.59521	0.159783	0.128989	0.239178	1.00462	0	0.000102957	0.000255232	0.0805857	0.537471	0.338483	0.04346	0.130386	0.869614
	CD03G2-Line1-35	37.359	0.117	20.112	26.13	2.079	1.983	11.416	0.025	0.002	0.05	99.273	2.98746	0.00703757	1.89548	1.63101	0.116436	0.140814	0.236395	0.978126	0.00387609	0.000204031	0.00316123	0.0791588	0.546155	0.327533	0.0471528	0.12659	0.87341
	CD03G2-Line1-36	37.282	0.088	19.55	26.089	2.058	2.001	11.572	0.001	0.022	0	98.663	3.0017	0.00532943	1.85512	1.62341	0.133229	0.140346	0.240173	0.998275	0.000156104	0.0022597	0	0.079999	0.540739	0.332514	0.0467476	0.128877	0.871123
	CD03G2-Line1-37	37.184	0.091	19.71	26.107	2.038	1.981	11.444	0.012	0	0.016	98.583	2.99593	0.00551501	1.87162	1.63274	0.126347	0.13908	0.23794	0.98793	0.00187458	0	0.00101923	0.0793745	0.544666	0.329563	0.0463957	0.127194	0.872806
	CD03G2-Line1-38	37.557	0.108	19.984	26.244	2.182	1.999	11.185	0.009	0	0.001	99.269	3.00549	0.00650097	1.88479	1.66379	0.0925575	0.147899	0.238477	0.959033	0.00139641	0	6.32708e-05	0.0792492	0.552901	0.3187	0.0491489	0.125364	0.874636
	CD03G2-Line1-39	37.669	0.095	19.97	26.003	2.019	1.927	11.248	0.026	0	0	98.957	3.02236	0.00573344	1.88841	1.68534	0.0594434	0.137209	0.23049	0.966965	0.00404466	0	0	0.0763211	0.558059	0.320186	0.0454335	0.120308	0.879692
	CD03G2-Line1-40	37.15	0	19.879	26.474	2.196	1.944	11.175	0.016	0	0.028	98.862	2.98683	0	1.88366	1.63664	0.143391	0.149544	0.233	0.962659	0.00249413	0	0.00177987	0.0781397	0.548868	0.32284	0.0501516	0.124623	0.875377
	CD03G2-Line1-41	37.45	0.121	19.934	26.249	2.099	2.013	11.15	0.026	0.003	0.037	99.082	3.00214	0.00729616	1.88335	1.65996	0.0997767	0.14252	0.240565	0.957696	0.0040411	0.000306803	0.00234509	0.0801684	0.553184	0.319153	0.047495	0.126578	0.873422
	CD03G2-Line1-42	37.714	0.085	19.689	26.241	2.151	2.012	11.206	0	0	0.004	99.102	3.02441	0.00512727	1.86088	1.68004	0.0798023	0.146104	0.240533	0.962856	0	0	0.000253616	0.0793959	0.554554	0.317823	0.0482267	0.12524	0.87476
	CD03G2-Line1-43	37.584	0.099	19.901	25.819	2.002	2.023	11.356	0	0.019	0.023	98.826	3.01799	0.00597969	1.88341	1.6647	0.0691438	0.136164	0.242169	0.977041	0	0.00194637	0.00146023	0.0801865	0.551211	0.323516	0.0450864	0.126998	0.873002
	CD03G2-Line1-44	37.68	0	19.661	26.142	2.055	1.985	11.333	0.008	0.002	0	98.866	3.02727	0	1.86167	1.67121	0.0852349	0.139842	0.237744	0.975571	0.00124617	0.000204988	0	0.0786094	0.552582	0.32257	0.0462384	0.124541	0.875459
	CD03G2-Line1-45	37.629	0.007	20.037	26.338	1.895	2.017	11.405	0.003	0.007	0.043	99.381	3.00563	0.000420572	1.88626	1.65924	0.100104	0.128206	0.240175	0.97607	0.000464601	0.000713295	0.00271556	0.0799598	0.552401	0.324957	0.0426827	0.126446	0.873554
	CD03G2-Line1-46	37.345	0.056	20.215	26.155	1.894	2.071	11.637	0.021	0	0.038	99.432	2.97819	0.00335921	1.89998	1.60657	0.137766	0.127934	0.246212	0.994339	0.00324703	0	0.00239598	0.0827587	0.540014	0.334225	0.0430021	0.132887	0.867113
	CD03G2-Line1-47	37.593	0.083	20.157	26.388	1.858	2.048	11.676	0	0.02	0	99.823	2.98824	0.00496268	1.88839	1.62693	0.127236	0.125095	0.242687	0.994434	0	0.00202814	0	0.0811895	0.544279	0.332681	0.0418497	0.129806	0.870194
	CD03G2-Line1-48	37.791	0.004	19.846	26.25	1.805	2.074	11.59	0	0	0.018	99.378	3.01756	0.000240246	1.86765	1.65727	0.0956093	0.122076	0.246879	0.991572	0	0	0.00113637	0.0818077	0.549166	0.328574	0.0404519	0.129653	0.870347
	CD03G2-Line1-49	37.393	0.031	19.729	25.854	1.713	1.971	11.767	0	0.009	0.019	98.486	3.01213	0.00187834	1.87303	1.64299	0.0986808	0.116876	0.236689	1.0156	0	0.000924877	0.00121008	0.078578	0.545454	0.337167	0.0388015	0.12592	0.87408
	CD03G2-Line1-50	37.61	0.052	19.902	25.895	1.737	2.094	11.819	0.004	0.002	0.023	99.138	3.00743	0.0031277	1.87562	1.62902	0.10264	0.117646	0.249619	1.01262	0.000620152	0.000204024	0.00145411	0.0829599	0.541401	0.33654	0.0390992	0.132872	0.867128
	CD03G2-Line1-51	37.587	0.057	19.853	26.372	1.583	2.004	12.029	0	0	0.009	99.494	2.99777	0.00341952	1.86613	1.62805	0.13092	0.106937	0.238269	1.02793	0	0	0.000567521	0.0793914	0.54247	0.342507	0.0356314	0.127667	0.872333
	CD03G2-Line1-52	37.309	0.053	19.904	25.764	1.528	2.051	11.979	0.024	0.006	0.021	98.639	2.99638	0.00320176	1.884	1.61057	0.119854	0.103942	0.24556	1.03081	0.00373716	0.000614743	0.00133347	0.082103	0.538494	0.34465	0.0347531	0.132297	0.867703
	CD03G2-Line1-53	37.771	0.022	20.013	26.221	1.57	1.963	11.693	0.016	0.01	0.023	99.302	3.01718	0.00132189	1.88413	1.67073	0.0809182	0.106225	0.233761	1.00079	0.00247804	0.00101906	0.00145261	0.0776225	0.554783	0.332321	0.0352731	0.122742	0.877258
	CD03G2-Line1-54	37.344	0.045	20.127	25.841	1.502	1.996	11.719	0.024	0.03	0.007	98.635	2.9994	0.00271866	1.90523	1.63882	0.0968961	0.102181	0.238992	1.0085	0.00373741	0.00307392	0.000444519	0.0799705	0.548376	0.337462	0.0341913	0.127271	0.872729
	CD03G2-Line1-55	37.541	0.077	20.065	26.281	1.49	2.044	11.598	0.001	0.006	0.043	99.146	3.00313	0.00463328	1.89175	1.66743	0.0907656	0.100958	0.243758	0.994088	0.000155101	0.00061232	0.00271967	0.0810841	0.554657	0.330676	0.0335829	0.127543	0.872457
	CD03G2-Line1-56	37.474	0.068	20.029	26.111	1.482	1.959	11.747	0.024	0	0.037	98.931	3.00378	0.00409993	1.89214	1.65684	0.0934832	0.100617	0.234089	1.00888	0.00372989	0	0.00234487	0.0780187	0.552202	0.336245	0.0335343	0.123796	0.876204
	CD03G2-Line1-57	37.34	0.1	19.985	26.314	1.379	2.093	11.82	0.008	0.022	0.073	99.134	2.98633	0.00601579	1.88375	1.62955	0.130425	0.0934142	0.249541	1.01287	0.00124051	0.00224463	0.00461599	0.0835877	0.545844	0.339278	0.0312906	0.132799	0.867201
	CD03G2-Line1-58	37.594	0.084	20.062	26.388	1.288	2.157	11.882	0.018	0.011	0.092	99.576	2.9917	0.00502815	1.88161	1.63311	0.123043	0.0868161	0.255893	1.01312	0.00277727	0.00111674	0.0057885	0.0856132	0.546384	0.338957	0.0290458	0.135465	0.864535
	CD03G2-Line1-59	37.678	0.143	20.046	26.101	1.188	2.127	12.17	0.035	0	0.084	99.572	2.99656	0.00855461	1.87896	1.62506	0.110929	0.0800269	0.25218	1.03705	0.00539696	0	0.00528193	0.0842195	0.542716	0.346338	0.0267263	0.134335	0.865665
	CD03G2-Line1-60	37.418	0.084	19.657	26.105	1.069	2.11	12.156	0.022	0.014	0.051	98.686	3.00377	0.00507218	1.85977	1.62837	0.124162	0.0726857	0.252509	1.04556	0.00342417	0.00143375	0.00323695	0.0841942	0.542948	0.348622	0.0242356	0.134251	0.865749
	CD03G2-Line1-61	37.755	0.11	19.557	26.345	0.968	2.11	12.328	0	0.008	0.068	99.249	3.01566	0.0066089	1.84105	1.64885	0.110943	0.0654889	0.251245	1.05505	0	0.000815184	0.00429433	0.0831764	0.545862	0.349281	0.0216805	0.132228	0.867772
	CD03G2-Line1-62	37.581	0.036	20.057	25.364	0.816	2.408	12.133	0.01	0.002	0.037	98.444	3.0128	0.00217087	1.89506	1.62608	0.0744174	0.0554085	0.287784	1.04218	0.00155435	0.000204546	0.00234521	0.0955632	0.539965	0.346073	0.0183993	0.150368	0.849632
	CD03G2-Line1-63	37.7	0.081	19.988	25.694	0.705	2.429	12.266	0.017	0.006	0.077	98.963	3.00794	0.00486119	1.87955	1.62118	0.093233	0.0476433	0.288911	1.04859	0.0026298	0.000610714	0.00485733	0.0961012	0.539257	0.348794	0.0158477	0.151255	0.848745
	CD03G2-Line1-64	37.23	0.081	20.077	25.224	0.623	2.581	12.331	0.013	0	0.034	98.194	2.98775	0.00488951	1.89892	1.57718	0.115678	0.0423471	0.308779	1.06028	0.00202274	0	0.00215729	0.103319	0.527734	0.354777	0.0141696	0.163725	0.836275
	CD03G2-Line1-65	37.533	0.042	20.121	25.145	0.685	3.272	12.264	0.009	0	0	99.071	2.97518	0.00250426	1.87978	1.50067	0.16623	0.0459914	0.386654	1.04161	0.00138321	0	0	0.129971	0.504438	0.350131	0.0154597	0.204869	0.795131
	CD03G2-Line1-66	37.593	0.053	20.281	24.594	0.72	3.47	11.828	0	0.046	0.013	98.598	2.98867	0.00316939	1.90027	1.51525	0.119896	0.0484829	0.411253	1.00752	0	0.00466538	0.000817134	0.137888	0.508045	0.337811	0.0162557	0.213471	0.786529
	CD03G2-Line1-67	37.531	0.13	20.064	24.79	0.884	3.87	11.127	0.019	0.003	0.012	98.43	2.98762	0.00778409	1.88239	1.52103	0.129292	0.0596036	0.459256	0.949044	0.00293248	0.00030466	0.000755257	0.153652	0.508887	0.31752	0.0199415	0.231914	0.768086
	CD03G2-Line1-68	38.143	0.023	19.925	25.698	1.175	4.155	10.088	0.005	0.009	0	99.221	3.01664	0.00136825	1.85722	1.59123	0.108441	0.0787103	0.489878	0.854844	0.000766699	0.00090805	0	0.162499	0.52783	0.283562	0.0261092	0.235393	0.764607
	CD03G2-Line1-69	38.587	0	19.326	25.86	1.714	4.187	8.618	0	0.032	0	98.324	3.08824	0	1.82292	1.73083	0	0.116189	0.499552	0.739008	0	0.00326722	0	0.161899	0.560941	0.239504	0.0376555	0.223976	0.776024
	CD03G2-Line2-01	37.831	0.049	19.908	26.88	1.706	4.266	8.033	0.005	0	0.047	98.725	3.01837	0.0029407	1.87201	1.79353	0	0.115289	0.507404	0.686713	0.000773466	0	0.00296484	0.163524	0.578011	0.22131	0.0371548	0.22052	0.77948
	CD03G2-Line2-02	37.867	0.08	19.93	25.974	1.465	4.148	9.628	0.008	0	0.025	99.125	3.00193	0.00477045	1.8621	1.72201	0	0.0983701	0.490216	0.817804	0.00122964	0	0.00156696	0.156699	0.550444	0.261413	0.0314442	0.221594	0.778406
	CD03G2-Line2-03	38.091	0.057	20.234	25.399	1.237	4.054	10.243	0.003	0	0.072	99.39	3.00666	0.00338428	1.88235	1.67662	0	0.0827022	0.47704	0.866289	0.000459124	0	0.00449339	0.153752	0.540383	0.279209	0.0266553	0.221502	0.778498
	CD03G2-Line2-04	38.044	0.053	20.157	24.755	0.844	3.78	11.124	0	0.009	0.013	98.779	3.01837	0.00316295	1.88481	1.6425	0	0.0567171	0.447082	0.945628	0	0.000910935	0.000815471	0.144596	0.531222	0.305838	0.0183436	0.213957	0.786043
	CD03G2-Line2-05	37.983	0.075	20.395	25.226	0.816	3.715	11.496	0	0.003	0.049	99.758	2.98603	0.00443502	1.88966	1.65848	0	0.054335	0.435384	0.968333	0	0.000300874	0.00304565	0.139702	0.532155	0.310709	0.0174345	0.207934	0.792066
	CD03G2-Line2-06	37.941	0.06	19.965	25.159	0.647	3.137	11.918	0	0	0.18	99.007	3.01439	0.00358568	1.86946	1.67163	0	0.0435392	0.371547	1.01454	0	0	0.0113069	0.119806	0.539018	0.327137	0.0140392	0.181848	0.818152
	CD03G2-Line2-07	37.861	0.128	20.237	24.876	0.695	2.907	12.449	0	0.019	0.067	99.239	3.00039	0.00763001	1.89011	1.64863	0	0.0466504	0.343431	1.05704	0	0.00192087	0.00419797	0.110936	0.532545	0.34145	0.0150692	0.1724	0.8276
	CD03G2-Line2-08	38.086	0.089	20.247	25.721	0.991	2.596	12.296	0.012	0.01	0.071	100.119	3.0018	0.00527638	1.88076	1.69535	0	0.0661569	0.305021	1.03837	0.00183377	0.00100548	0.00442439	0.0982384	0.546024	0.33443	0.0213072	0.152482	0.847518
	CD03G2-Line2-09	37.832	0.05	20.12	25.639	1.146	2.535	11.943	0.005	0	0.056	99.326	3.00779	0.00299011	1.88526	1.70469	0	0.0771716	0.300451	1.01736	0.000770733	0	0.0035201	0.0969301	0.549958	0.328215	0.0248967	0.149841	0.850159
	CD03G2-Line2-10	37.716	0.066	20.039	25.613	1.345	2.548	11.823	0	0	0.015	99.165	3.00465	0.00395496	1.88149	1.70642	0	0.0907562	0.302605	1.00918	0	0	0.000944798	0.0973333	0.548871	0.324604	0.0291918	0.150623	0.849377
	CD03G2-Line2-11	37.685	0.03	19.69	25.978	1.27	2.431	11.859	0	0	0.025	98.968	3.01285	0.0018041	1.85529	1.73689	0	0.086	0.289736	1.01585	0	0	0.00158026	0.0926127	0.555186	0.324712	0.0274894	0.142965	0.857035
	CD03G2-Line2-12	37.751	0.083	19.476	25.586	1.453	2.337	12.098	0	0.013	0.077	98.874	3.02253	0.00499861	1.8378	1.71317	0	0.0985354	0.278939	1.03783	0	0.00132783	0.00487429	0.0891612	0.547604	0.331738	0.0314963	0.140022	0.859978
	CD03G2-Line2-13	37.758	0.039	19.93	25.811	1.496	2.376	12.262	0.029	0	0.001	99.702	2.9947	0.00232669	1.86298	1.71201	0	0.100499	0.280931	1.04203	0.00445953	0	6.27081e-05	0.0895979	0.546014	0.332336	0.0320523	0.140963	0.859037
	CD03G2-Line2-14	38.153	0.129	20.051	24.858	1.471	2.455	12.013	0	0.029	0.021	99.18	3.03703	0.00772396	1.8811	1.65479	0	0.0991787	0.291327	1.02458	0	0.00294494	0.00132166	0.0948987	0.539042	0.333753	0.0323071	0.149697	0.850303
	CD03G2-Line2-15	37.987	0.063	20.148	26.299	1.53	2.632	11.287	0.008	0.022	0.059	100.035	3.0036	0.00374695	1.87757	1.73901	0	0.102467	0.310243	0.956223	0.00122643	0.00221916	0.0036884	0.0998225	0.559538	0.30767	0.0329694	0.151393	0.848607
	CD03G2-Line2-16	37.591	0.071	19.398	25.674	1.566	2.626	11.004	0	0	0.074	98.004	3.0356	0.00431269	1.84618	1.73384	0	0.107112	0.316129	0.952103	0	0	0.00472466	0.101676	0.557652	0.306223	0.0344501	0.154211	0.845789
	CD03G2-Line2-17	37.847	0.074	20.304	25.513	1.495	2.493	11.848	0.008	0.007	0.065	99.654	3.00011	0.00441231	1.89689	1.69131	0	0.100376	0.294602	1.00629	0.00122954	0.000707883	0.00407378	0.0952611	0.546893	0.325389	0.0324572	0.148346	0.851654
	CD03G2-Line2-18	37.767	0	19.937	25.607	1.561	2.493	11.972	0.021	0.015	0.049	99.422	3.00204	0	1.86775	1.70223	0	0.105097	0.295416	1.01963	0.00323645	0.00152108	0.00307949	0.0946127	0.545171	0.326556	0.0336594	0.147882	0.852118
	CD03G2-Line2-19	37.481	0.119	19.856	25.329	1.495	2.565	11.968	0.013	0.011	0.007	98.844	2.99511	0.00715283	1.87003	1.69268	0	0.101188	0.305561	1.0247	0.00201415	0.00112138	0.000442261	0.0978066	0.541809	0.327995	0.0323891	0.152915	0.847085
	CD03G2-Line2-20	38.107	0.058	19.781	25.685	1.521	2.613	11.836	0	0.009	0.091	99.701	3.02158	0.00345929	1.84856	1.7032	0	0.102151	0.308871	1.00556	0	0.000910397	0.00570493	0.0990042	0.545935	0.322317	0.0327431	0.153509	0.846491
	CD03G2-Line2-21	38.004	0.078	19.819	25.282	1.455	2.588	12.304	0	0.011	0.059	99.6	3.01326	0.00465191	1.85202	1.67639	0	0.0977136	0.3059	1.04526	0	0.00111265	0.0036986	0.0978797	0.536398	0.334456	0.0312657	0.154317	0.845683
	CD03G2-Line2-22	37.149	0.067	20.141	25.638	1.671	2.884	11.652	0	0	0.126	99.328	2.95195	0.00400466	1.88625	1.70373	0	0.112466	0.341637	0.992053	0	0	0.00791609	0.10846	0.540887	0.314949	0.0357049	0.16703	0.83297
	CD03G2-Line2-23	37.847	0.031	19.509	26.189	1.638	2.995	10.63	0.011	0.009	0.027	98.886	3.02593	0.00186431	1.83831	1.75106	0	0.110924	0.356971	0.910612	0.00170516	0.000917969	0.00170675	0.114064	0.559522	0.29097	0.0354439	0.169338	0.830662
	CD03G2-Line2-24	37.925	0	20.082	26.412	1.784	3.392	9.917	0.026	0	0.086	99.624	3.00417	0	1.87483	1.74967	0	0.119696	0.400556	0.841691	0.00399318	0	0.00538613	0.128729	0.562303	0.2705	0.0384674	0.186286	0.813714
	CD03G2-Line2-25	37.625	0.005	19.825	25.148	1.545	2.975	11.787	0.017	0	0.088	99.015	2.99502	0.000299379	1.85991	1.6741	0	0.104168	0.353035	1.00531	0.00262372	0	0.0055384	0.112553	0.533729	0.320507	0.0332105	0.174155	0.825845
	CD03G2-Line2-26	37.533	0.02	20.063	25.53	1.714	3.588	10.544	0.018	0.002	0.112	99.124	2.97975	0.00119433	1.87723	1.69501	0	0.115256	0.424646	0.896902	0.00277067	0.000202561	0.00703013	0.135591	0.541224	0.286384	0.0368015	0.200337	0.799663
	CD03G2-Line2-27	37.486	0.031	19.574	26.672	1.801	3.637	10.053	0	0.001	0.034	99.289	2.98008	0.00185374	1.83398	1.77325	0	0.121271	0.431033	0.856302	0	0.000101418	0.00213706	0.135466	0.5573	0.26912	0.0381133	0.195543	0.804457
	CD03G2-Line2-28	37.772	0.073	20.108	26.451	1.857	3.784	9.217	0.014	0.028	0.041	99.345	2.99685	0.0043566	1.88027	1.75507	0	0.124794	0.447564	0.783535	0.00215362	0.00283408	0.00257192	0.143867	0.564156	0.251863	0.0401142	0.203195	0.796805
	CD03G2-Line2-29	37.833	0.015	19.837	25.99	1.777	3.929	9.42	0	0	0.037	98.838	3.01328	0.000898647	1.86209	1.73113	0	0.119878	0.466508	0.803882	0	0	0.00232996	0.149455	0.554601	0.257539	0.0384053	0.212277	0.787723
	CD03G2-Line2-30	37.701	0.007	20.103	26.208	1.934	3.908	9.05	0	0	0.003	98.914	3.00168	0.000419218	1.88638	1.74503	0	0.130423	0.463848	0.77203	0	0	0.000188848	0.149084	0.560863	0.248135	0.0419187	0.209993	0.790007
	CD03G2-Line2-31	37.686	0.089	20.27	25.182	1.617	3.4	11.302	0.012	0.007	0.035	99.6	2.97591	0.00528638	1.88647	1.66297	0	0.108152	0.400246	0.956242	0.00183724	0.000705173	0.00218517	0.127972	0.531707	0.305742	0.0345797	0.193991	0.806009
	CD03G2-Line2-32	37.968	0	20.328	24.68	1.426	3.137	11.865	0	0	0.053	99.457	3.00129	0	1.89383	1.63151	0	0.095476	0.369669	1.00492	0	0	0.00331241	0.119187	0.526027	0.324002	0.0307831	0.184725	0.815275
	CD03G2-Line2-33	37.884	0.061	20.564	24.557	1.193	2.996	12.28	0.01	0.015	0.044	99.604	2.98857	0.00361965	1.91193	1.62009	0	0.0797138	0.352337	1.03796	0.00152952	0.00150959	0.00274435	0.114021	0.524284	0.335898	0.0257965	0.178631	0.821369
	CD03G2-Line2-34	37.483	0.119	20.084	24.961	0.825	2.941	12.421	0.004	0.014	0.063	98.915	2.98121	0.00711926	1.88263	1.66026	0	0.0555773	0.348708	1.05849	0.000616829	0.00142051	0.00396167	0.111657	0.531617	0.33893	0.0177959	0.173576	0.826424
	CD03G2-Line2-35	38.027	0.01	20.015	24.448	0.846	3.198	12.082	0	0	0.03	98.656	3.02635	0.000598628	1.87732	1.62715	0	0.0570274	0.379415	1.03024	0	0	0.00188768	0.122636	0.525933	0.332999	0.0184326	0.189087	0.810913
	CD03G2-Line2-36	37.85	0.052	20.164	24.986	0.66	3.352	12.103	0.012	0.006	0.012	99.197	2.99465	0.00309466	1.88024	1.65323	0	0.0442292	0.39536	1.026	0.00184081	0.000605606	0.000750655	0.126766	0.530082	0.32897	0.0141814	0.192991	0.807009
	CD03G2-Line2-37	37.581	0.024	20.458	24.707	0.789	3.643	11.833	0.013	0	0.012	99.06	2.97128	0.0014273	1.90631	1.63362	0	0.0528369	0.429381	1.0024	0.0019928	0	0.000750127	0.1377	0.523891	0.321465	0.0169444	0.208134	0.791866
	CD03G2-Line2-38	37.872	0.027	20.29	24.703	1.035	4.017	11.214	0	0	0	99.158	2.98956	0.00160318	1.88767	1.63078	0	0.0692013	0.472715	0.948468	0	0	0	0.151455	0.522491	0.303883	0.0221717	0.224729	0.775271
	CD03G2-Line2-39	37.709	0.048	20	25.597	1.811	4.085	9.464	0	0	0.038	98.752	3.0012	0.00287357	1.87602	1.70371	0	0.122083	0.484676	0.807046	0	0	0.00239118	0.155469	0.546496	0.258875	0.0391603	0.221476	0.778524
	CD03G2-Line3-01	38.029	0.052	19.895	25.463	3.62	4.111	7.545	0.025	0.005	0	98.745	3.03795	0.00312463	1.87312	1.70111	0	0.24494	0.489578	0.6458	0.00387215	0.000509559	0	0.15888	0.552052	0.209578	0.0794892	0.223482	0.776518
	CD03G2-Line3-02	37.811	0	19.857	26.123	2.357	4.436	7.593	0	0.002	0.003	98.182	3.03063	0	1.87579	1.75103	0	0.160015	0.530048	0.652081	0	0.000204505	0.000190115	0.17136	0.566095	0.210813	0.0517315	0.232367	0.767633
	CD03G2-Line3-03	38.157	0	20.085	27.103	1.606	4.471	8.106	0	0.01	0.029	99.567	3.01514	0	1.87052	1.79105	0	0.107489	0.52668	0.6863	0	0.00100807	0.0018118	0.169268	0.575619	0.220567	0.0345456	0.22724	0.77276
	CD03G2-Line3-04	37.901	0.036	19.864	26.296	1.434	4.156	9.368	0.003	0	0.053	99.111	3.00725	0.00214858	1.85756	1.74488	0	0.0963726	0.49159	0.796415	0.000461516	0	0.00332486	0.157095	0.557602	0.254506	0.0307973	0.219807	0.780193
	CD03G2-Line3-05	37.955	0.05	20.073	25.679	1.103	3.851	10.331	0.003	0	0	99.045	3.01005	0.00298267	1.87618	1.7031	0	0.0740911	0.455289	0.877851	0.000461289	0	0	0.14638	0.547562	0.282237	0.023821	0.21094	0.78906
	CD03G2-Line3-06	37.84	0.066	19.633	26.241	1.013	3.843	10.108	0	0	0	98.744	3.01541	0.00395612	1.84391	1.74877	0	0.0683739	0.456536	0.863047	0	0	0	0.145545	0.557514	0.275143	0.0217979	0.207017	0.792983
	CD03G2-Line3-07	37.903	0.044	20.149	26.338	1.007	3.582	10.252	0.005	0.008	0.028	99.316	3.00434	0.00262336	1.88228	1.74588	0	0.0676067	0.423262	0.870677	0.000768408	0.000808954	0.00175474	0.13621	0.561841	0.280192	0.0217565	0.195129	0.804871
	CD03G2-Line3-08	37.704	0.04	19.938	26.178	1.011	3.671	10.263	0	0.006	0	98.811	3.00258	0.00239605	1.8713	1.74341	0	0.0681935	0.435813	0.875698	0	0.00060956	0	0.139544	0.558228	0.280393	0.0218351	0.199985	0.800015
	CD03G2-Line3-09	38.03	0.047	20.099	26.557	0.962	3.675	10.169	0.018	0	0.025	99.582	3.00613	0.00279453	1.87246	1.75557	0	0.0644083	0.43306	0.861258	0.00275868	0	0.00156243	0.139056	0.563713	0.27655	0.0206815	0.197868	0.802132
	CD03G2-Line3-10	37.72	0	20.372	26.251	0.985	3.601	9.883	0.001	0	0.058	98.871	3.00191	0	1.9108	1.74714	0	0.0663968	0.427226	0.842728	0.000154302	0	0.00364949	0.138553	0.566611	0.273303	0.021533	0.196483	0.803517
	CD03G2-Line3-11	37.726	0.07	19.946	26.506	0.91	3.51	9.962	0.021	0	0.006	98.657	3.01279	0.00420489	1.87732	1.77022	0	0.0615537	0.417872	0.852407	0.00325157	0	0.000378842	0.134708	0.570661	0.274788	0.0198429	0.190975	0.809025
	CD03G2-Line3-12	37.641	0.061	20.358	26.711	0.947	3.475	10.322	0.013	0	0.025	99.553	2.97836	0.00363057	1.89848	1.76751	0	0.0634674	0.409901	0.87509	0.00199437	0	0.00156399	0.131549	0.567243	0.28084	0.0203684	0.188252	0.811748
	CD03G2-Line3-13	37.696	0.08	19.792	26.012	0.999	3.424	10.439	0.021	0	0.022	98.485	3.01479	0.00481262	1.86555	1.73977	0	0.0676725	0.408229	0.894528	0.00325632	0	0.00139112	0.131255	0.559376	0.287611	0.0217583	0.190051	0.809949
	CD03G2-Line3-14	37.504	0.063	20.688	26.468	0.963	3.482	10.697	0.014	0.017	0.028	99.924	2.95286	0.00373108	1.91973	1.74278	0	0.0642209	0.408698	0.902402	0.00213717	0.00170755	0.00174302	0.131073	0.558923	0.289408	0.0205962	0.189962	0.810038
	CD03G2-Line3-15	38.05	0.102	19.996	26.369	0.92	3.66	10.19	0.008	0	0	99.295	3.01641	0.00608227	1.86825	1.74818	0	0.0617745	0.432539	0.865532	0.00122962	0	0	0.139169	0.562472	0.278483	0.0198758	0.198347	0.801653
	CD03G2-Line3-16	37.998	0.091	20.278	26.912	0.987	3.848	9.581	0	0.002	0.006	99.703	3.00032	0.00540478	1.88707	1.77709	0	0.06601	0.452951	0.810572	0	0.000201463	0.000374574	0.145802	0.572033	0.260917	0.0212482	0.203113	0.796887
	CD03G2-Line3-17	37.763	0.179	19.899	26.894	1.005	3.765	9.279	0.013	0.001	0.025	98.823	3.0122	0.0107399	1.8707	1.79403	0	0.0678999	0.447704	0.793034	0.00201052	0.00010176	0.00157665	0.144297	0.578221	0.255598	0.0218844	0.199714	0.800286
	CD03G2-Line3-18	37.596	0.173	19.547	26.737	0.991	3.853	9.374	0	0	0	98.271	3.0152	0.0104364	1.84761	1.79326	0	0.0673183	0.460662	0.805513	0	0	0	0.147329	0.573521	0.25762	0.0215298	0.204382	0.795618
	CD03G2-Line3-19	37.844	0.119	20.269	26.73	0.919	3.698	9.775	0.02	0.019	0.009	99.402	2.99722	0.00708922	1.89195	1.77042	0	0.0616485	0.436614	0.829492	0.00307113	0.0019197	0.000563564	0.140926	0.57144	0.267735	0.0198983	0.197828	0.802172
	CD03G2-Line3-20	37.643	0.063	19.897	26.522	0.992	3.923	9.292	0.003	0.029	0	98.364	3.01121	0.00379076	1.87586	1.77427	0	0.067213	0.467825	0.796414	0.00046529	0.00295946	0	0.150633	0.57129	0.256435	0.0216417	0.208656	0.791344
	CD03G2-Line3-21	37.81	0.078	20.263	26.887	1.003	3.814	9.797	0.018	0.012	0	99.682	2.98545	0.00463263	1.88566	1.77542	0	0.0670795	0.448945	0.828839	0.00275564	0.00120877	0	0.143879	0.568994	0.265629	0.0214979	0.20183	0.79817
	CD03G2-Line3-22	37.887	0.026	20.157	26.132	1.069	3.73	9.465	0.007	0.027	0	98.5	3.02575	0.00156187	1.89725	1.7453	0	0.0723112	0.444079	0.809909	0.00108389	0.00275084	0	0.144576	0.568206	0.263676	0.0235418	0.202833	0.797167
	CD03G2-Line3-23	37.451	0.07	20.223	26.521	0.902	3.84	9.544	0	0.004	0	98.555	2.98901	0.00420234	1.90224	1.77015	0	0.0609754	0.456881	0.816144	0	0.000407269	0	0.147184	0.570252	0.262921	0.0196432	0.205153	0.794847
	CD03G2-Line3-24	37.624	0.024	19.987	27.214	1.055	3.75	9.62	0.02	0.011	0	99.305	2.986	0.00143273	1.86951	1.80623	0	0.070919	0.443675	0.818037	0.00307752	0.00111372	0	0.141349	0.575441	0.260616	0.0225939	0.197197	0.802803
	CD03G2-Line3-25	37.896	0.073	20.301	26.818	1.002	3.731	9.675	0.004	0.012	0.012	99.524	2.99827	0.0043444	1.893	1.77443	0	0.0671476	0.440059	0.820166	0.000613598	0.0012112	0.00075065	0.141872	0.572065	0.264415	0.0216479	0.198718	0.801282
	CD03G2-Line3-26	38.044	0.047	20.261	25.939	0.972	3.631	9.874	0	0.005	0	98.773	3.02919	0.00281493	1.90133	1.72723	0	0.0655529	0.430998	0.842377	0	0.000507889	0	0.140566	0.56332	0.274734	0.0213795	0.1997	0.8003
	CD03G2-Line3-27	38.104	0.029	20.422	26.67	0.997	3.674	9.793	0	0.026	0.003	99.718	3.00777	0.00172187	1.89989	1.76057	0	0.0666583	0.432336	0.828252	0	0.00261822	0.000187229	0.140014	0.570166	0.268233	0.0215875	0.197152	0.802848
	CD03G2-Line3-28	37.693	0.002	19.948	26.428	0.959	3.512	9.717	0.02	0	0	98.279	3.02136	0.000120587	1.88451	1.77159	0	0.0651097	0.419667	0.83454	0.00310827	0	0	0.135775	0.573161	0.269999	0.0210649	0.191519	0.808481
	CD03G2-Line3-29	38.041	0	20.365	26.327	0.943	3.617	10.137	0	0	0.013	99.443	3.00951	0	1.89882	1.74181	0	0.063189	0.426581	0.859265	0	0	0.000813142	0.138014	0.563539	0.278003	0.0204439	0.196727	0.803273
	CD03G2-Line3-30	38.03	0.102	20.26	27	0.894	3.569	9.869	0	0.009	0	99.733	3.0055	0.00606345	1.88706	1.78447	0	0.0598429	0.42048	0.835673	0	0.000907384	0	0.135618	0.575549	0.269531	0.0193013	0.190698	0.809302
	CD03G2-Line3-31	37.829	0.017	20.195	26.691	0.92	3.67	9.986	0.009	0.008	0.035	99.36	2.99726	0.00101316	1.88582	1.76856	0	0.0617408	0.433485	0.847743	0.00138257	0.000808626	0.00219253	0.139316	0.56839	0.272452	0.0198426	0.196855	0.803145
	CD03G2-Line3-32	37.907	0.044	20.502	26.38	0.945	3.658	9.749	0	0.015	0	99.2	3.00602	0.00262455	1.91613	1.74946	0	0.0634731	0.432439	0.828335	0	0.00151748	0	0.14069	0.569169	0.269491	0.0206504	0.198194	0.801806
	CD03G2-Line3-33	37.805	0.016	20.304	26.337	0.906	3.679	9.95	0	0	0	98.997	3.00383	0.000956258	1.90135	1.75004	0	0.0609732	0.435776	0.847075	0	0	0	0.140852	0.565648	0.273792	0.0197078	0.199366	0.800634
	CD03G2-Line3-34	37.63	0.022	20.279	26.439	0.91	3.75	10.034	0.008	0	0.003	99.075	2.98688	0.00131352	1.89708	1.75503	0	0.0611801	0.443735	0.853357	0.00123118	0	0.000188271	0.142529	0.56372	0.2741	0.0196512	0.201811	0.798189
	CD03G2-Line3-35	38.46	0.092	20.207	26.202	0.968	3.732	10.201	0.011	0.002	0.052	99.927	3.02729	0.00544706	1.87458	1.72479	0	0.0645365	0.437921	0.860322	0.00167874	0.000200832	0.00323614	0.141834	0.558624	0.278641	0.0209021	0.202487	0.797513
	CD03G2-Line3-36	37.81	0	20.327	26.3	0.94	3.819	10.25	0.008	0	0.04	99.494	2.98657	0	1.89232	1.73731	0	0.0628896	0.449701	0.867486	0.00122519	0	0.00249807	0.144256	0.557297	0.278274	0.0201738	0.205624	0.794376
	CD03G2-Line3-37	37.843	0.024	19.736	25.832	0.991	3.871	10.035	0	0	0	98.332	3.02482	0.00144296	1.85922	1.72675	0	0.0670924	0.46126	0.859419	0	0	0	0.1481	0.554418	0.27594	0.0215418	0.210813	0.789187
	CD03G2-Line3-38	37.918	0.034	20.227	26.064	1.056	3.935	9.866	0	0.037	0.022	99.159	3.00413	0.0020262	1.88869	1.72691	0	0.0708634	0.464757	0.837505	0	0.00373967	0.00137808	0.14992	0.557062	0.27016	0.0228589	0.212056	0.787944
	CD03G2-Line3-39	37.664	0.055	20.531	25.934	1.048	3.999	9.48	0	0.019	0.038	98.768	2.99361	0.00328822	1.92324	1.72383	0	0.0705529	0.473836	0.807328	0	0.00192655	0.00238798	0.154066	0.560495	0.262499	0.02294	0.215609	0.784391
	CD03G2-Line3-40	37.775	0.045	20.417	25.944	1.091	4.176	9.755	0	0	0	99.203	2.98705	0.00267658	1.90277	1.71566	0	0.0730716	0.492275	0.826492	0	0	0	0.158415	0.552103	0.265967	0.0235146	0.222957	0.777043
	CD03G2-Line3-41	37.927	0.031	19.983	25.821	1.147	4.286	9.312	0.005	0.012	0.03	98.554	3.01959	0.00185648	1.87506	1.71921	0	0.0773478	0.508698	0.794357	0.00077182	0.00121882	0.00188842	0.164117	0.554653	0.256276	0.024954	0.22833	0.77167
	CD03G2-Line3-42	37.671	0.051	20.413	26.072	1.332	4.388	9.061	0.016	0.01	0.021	99.035	2.98355	0.00303827	1.90542	1.72686	0	0.0893544	0.518086	0.768911	0.00245693	0.00101038	0.001315	0.166952	0.556475	0.247779	0.0287942	0.230779	0.769221
	CD03G2-Line3-43	37.883	0.071	20.303	26.606	1.381	4.451	8.963	0	0	0	99.658	2.98515	0.00420833	1.88555	1.75331	0	0.0921724	0.522864	0.756744	0	0	0	0.167312	0.561043	0.242151	0.0294944	0.229712	0.770288
	CD03G2-Line3-44	37.559	0.005	20.439	26.473	1.662	4.659	8.109	0.007	0.011	0.035	98.959	2.97829	0.00029823	1.91015	1.75554	0	0.111627	0.550749	0.688958	0.00107621	0.00111277	0.00219432	0.177268	0.565051	0.221753	0.0359289	0.238803	0.761197
	CD03G2-Line4-01	38.224	0.025	20.153	25.858	2.756	4.345	8.437	0	0.017	0	99.815	3.01295	0.00148226	1.8722	1.70454	0	0.184001	0.510569	0.712553	0	0.00170948	0	0.164082	0.547791	0.228994	0.0591327	0.230494	0.769506
	CD03G2-Line4-02	38.061	0.014	20.126	25.288	2.169	4.235	9.505	0.004	0	0.012	99.414	3.00606	0.000831715	1.8734	1.67027	0	0.145098	0.498631	0.804345	0.000612525	0	0.000749337	0.159902	0.535628	0.25794	0.0465305	0.2299	0.7701
	CD03G2-Line4-03	38.109	0.012	20.274	25.193	1.597	4.395	10.012	0.001	0	0.044	99.637	2.99629	0.000709688	1.87868	1.65651	0	0.106352	0.515139	0.843434	0.000152442	0	0.0027352	0.165033	0.530688	0.270207	0.0340717	0.237211	0.762789
	CD03G2-Line4-04	38.154	0.047	20.37	25.1	1.193	4.091	10.222	0.013	0.021	0	99.211	3.01311	0.00279192	1.89593	1.6577	0	0.0797996	0.48163	0.864936	0.00199051	0.00211569	0	0.156167	0.537504	0.280454	0.0258748	0.225132	0.774868
	CD03G2-Line4-05	38.418	0.032	20.386	25.453	1.2	4.153	10.584	0.008	0.001	0.001	100.236	3.00376	0.00188196	1.87853	1.66427	0	0.0794688	0.484061	0.886652	0.00121274	9.97444e-05	6.18171e-05	0.155424	0.534371	0.284689	0.0255161	0.225319	0.774681
	CD03G2-Line4-06	38.387	0.014	20.44	25.254	1.173	4.14	10.717	0.004	0.005	0.028	100.162	3.00217	0.000823584	1.88403	1.65172	0	0.0777023	0.48268	0.898042	0.000606536	0.00049886	0.00173136	0.155195	0.531075	0.288746	0.0249835	0.226143	0.773857
	CD03G2-Line4-07	38.266	0.091	20.102	24.781	1.719	4.255	10.037	0	0	0	99.251	3.02189	0.00540551	1.87094	1.63659	0	0.114981	0.500926	0.849264	0	0	0	0.161497	0.527633	0.2738	0.0370696	0.234349	0.765651
	CD03G2-Line4-08	38.277	0.011	20.097	26.19	2.539	4.449	8.1	0.03	0.017	0.018	99.728	3.01901	0.000652603	1.86816	1.7275	0	0.169619	0.523116	0.684518	0.0045877	0.00171054	0.00112248	0.168489	0.556405	0.220474	0.054632	0.232432	0.767568
	CD03G2-Line4-09	38.04	0.038	20.405	26.055	2.442	4.322	8.538	0	0.007	0.035	99.882	2.99519	0.00225059	1.89355	1.71566	0	0.16286	0.507314	0.720299	0	0.000703137	0.00217887	0.163327	0.552346	0.231896	0.0524318	0.228214	0.771786
	CD03G2-Line4-10	38.151	0.045	20.311	25.642	2.528	4.172	9.165	0	0.01	0.027	100.051	2.99866	0.0026605	1.88152	1.6855	0	0.1683	0.488848	0.771838	0	0.00100272	0.00167789	0.156959	0.541181	0.247822	0.0540377	0.224825	0.775175
	CD03G2-Line4-11	38.373	0.083	20.208	26.564	2.671	4.288	7.902	0	0	0	100.089	3.02184	0.00491646	1.87553	1.74942	0	0.178158	0.503395	0.666738	0	0	0	0.162505	0.564746	0.215236	0.0575126	0.223451	0.776549
	CD03G2-Line4-12	37.703	0.001	19.99	25.447	2.345	4.333	9.188	0.018	0.026	0.019	99.07	2.98881	5.96282e-05	1.86763	1.687	0	0.157453	0.512059	0.780399	0.00276657	0.00262939	0.00119084	0.163237	0.53779	0.248779	0.0501936	0.232854	0.767146
	CD03G2-Line4-13	37.903	0	19.836	25.367	2.466	4.282	8.764	0.034	0.015	0.009	98.676	3.01866	0	1.86188	1.68953	0	0.166349	0.508389	0.747853	0.00525008	0.00152402	0.000566712	0.163358	0.542887	0.240303	0.0534518	0.231305	0.768695
	CD03G2-Line4-14	38.367	0	19.959	24.798	2.018	4.112	10.069	0	0	0	99.323	3.03128	0	1.8585	1.63848	0	0.135044	0.484318	0.85237	0	0	0	0.155719	0.526807	0.274055	0.0434195	0.228151	0.771849
	CD03G2-Line4-15	38.013	0.002	20.192	24.431	1.997	4.177	10.409	0	0	0	99.221	3.00158	0.000118789	1.87911	1.6133	0	0.133561	0.491689	0.880642	0	0	0	0.157633	0.517217	0.28233	0.0428192	0.233583	0.766417
	CD03G2-Line4-16	38.062	0.02	20.084	24.93	1.79	3.972	10.27	0.001	0	0.015	99.144	3.01328	0.00119099	1.87394	1.65054	0	0.120029	0.468777	0.871148	0.000153495	0	0.000938898	0.150708	0.530636	0.280067	0.0385884	0.221192	0.778808
	CD03G2-Line4-17	37.967	0.062	20.247	24.824	1.392	3.973	10.699	0	0	0.016	99.18	3.00092	0.00368612	1.8861	1.64088	0	0.0931908	0.46814	0.906077	0	0	0.000999879	0.15061	0.527905	0.291504	0.0299814	0.221971	0.778029
	CD03G2-Line4-18	37.852	0.047	19.84	24.879	1.14	4.043	10.365	0.039	0.005	0	98.21	3.02041	0.00282101	1.86584	1.66022	0	0.077049	0.480938	0.886175	0.00603376	0.000508986	0	0.154922	0.534799	0.285459	0.0248194	0.224616	0.775384
	CD03G2-Line4-19	38.259	0.007	20.182	24.548	1.515	4.186	10.521	0	0	0.009	99.227	3.01897	0.000415483	1.87692	1.61994	0	0.101257	0.492417	0.88952	0	0	0.000561496	0.158684	0.522033	0.286653	0.0326305	0.233113	0.766887
	CD03G2-Line4-20	37.976	0.041	20.294	25.42	2.424	4.402	8.932	0	0	0.01	99.499	2.99682	0.00243369	1.88745	1.67758	0	0.16202	0.517857	0.755219	0	0	0.000623922	0.16637	0.538951	0.242627	0.0520517	0.235879	0.764121
	CD01G2-Line1-01	38.092	0.097	21.349	27.968	1.012	4.619	7.211	0	0	0	100.348	2.98136	0.00571061	1.96931	1.77409	0.0565368	0.0670883	0.538937	0.604714	0	0	0	0.180559	0.594368	0.202596	0.0224765	0.233001	0.766999
	CD01G2-Line1-02	38.445	0.042	21.014	27.994	0.921	4.838	7.626	0	0	0.018	100.898	2.99091	0.00245777	1.92676	1.73591	0.0854027	0.0606887	0.561096	0.635672	0	0	0.00110717	0.187447	0.579919	0.21236	0.0202744	0.244273	0.755727
	CD01G2-Line1-03	38.456	0	21.558	27.476	1.01	4.913	7.738	0	0.003	0.031	101.185	2.97597	0	1.96621	1.69793	0.0802437	0.0662021	0.566788	0.641604	0	0.000296173	0.00189673	0.190675	0.571208	0.215845	0.0222713	0.250268	0.749732
	CD01G2-Line1-04	38.747	0	21.306	27.811	0.903	4.911	7.501	0	0.029	0.024	101.232	3.00029	0	1.94439	1.74449	0.0564382	0.059224	0.566895	0.622324	0	0.00286471	0.00146931	0.189411	0.58287	0.207931	0.0197879	0.245262	0.754738
	CD01G2-Line1-05	38.329	0.056	21.109	27.39	0.919	4.847	7.527	0.011	0.017	0.06	100.265	2.99475	0.00329118	1.94383	1.72997	0.0597401	0.0608183	0.564567	0.630128	0.00166637	0.0016945	0.0037065	0.189104	0.57946	0.211064	0.0203714	0.246049	0.753951
	CD01G2-Line1-06	38.66	0	21.17	27.455	1.046	5.028	7.316	0.052	0.001	0	100.728	3.00584	0	1.93991	1.72883	0.0563504	0.0688844	0.582784	0.609468	0.00783888	9.91888e-05	0	0.194913	0.57821	0.203838	0.0230385	0.252112	0.747888
	CD01G2-Line1-07	38.408	0.009	21.57	27.795	0.968	4.919	7.347	0	0.003	0.003	101.022	2.97941	0.000525146	1.97203	1.73493	0.0682123	0.0636017	0.568845	0.610649	0	0.000296885	0.000183996	0.191014	0.582578	0.205051	0.021357	0.246918	0.753082
	CD01G2-Line1-08	38.872	0.023	21.173	27.831	1.034	4.838	7.458	0.022	0	0	101.251	3.00994	0.00133961	1.93223	1.75369	0.0485232	0.067815	0.558463	0.618751	0.00330285	0	0	0.186234	0.584812	0.206339	0.0226147	0.241534	0.758466
	CD01G2-Line1-09	38.644	0.047	21.144	28.095	0.961	4.757	7.488	0.003	0.011	0	101.15	2.9995	0.00274406	1.93424	1.76087	0.0628221	0.0631793	0.550438	0.622738	0.000451475	0.00108922	0	0.183649	0.5875	0.207772	0.0210793	0.23815	0.76185
	CD01G2-Line1-10	38.375	0.014	20.678	29.706	0.973	4.501	6.946	0.044	0	0.003	101.24	2.99037	0.000820605	1.89907	1.81086	0.12501	0.0642206	0.522871	0.579942	0.00664777	0	0.000184832	0.175584	0.608101	0.194749	0.0215658	0.224049	0.775951
	CD01G2-Line-01	38.338	0.089	21.46	28.901	0.981	4.718	7.318	0.003	0.007	0.076	101.891	2.95798	0.00516518	1.95142	1.74603	0.118783	0.0641092	0.542666	0.604967	0.00044878	0.000689005	0.00463616	0.183471	0.590319	0.204535	0.0216748	0.237107	0.762893
	CD01G2-Line-02	38.258	0.042	21.07	26.951	0.856	4.699	8	0	0	0	99.876	2.9999	0.00247721	1.94718	1.71926	0.0480657	0.0568517	0.549286	0.672122	0	0	0	0.183247	0.57356	0.224226	0.0189663	0.242132	0.757868
	CD01G2-Line-03	38.317	0.061	20.997	27.768	1.026	4.97	7.569	0	0	0.066	100.774	2.98067	0.00356928	1.92502	1.70398	0.102452	0.0676012	0.576351	0.630861	0	0	0.00405924	0.193484	0.572038	0.211784	0.0226941	0.252748	0.747252
	CD01G2-Line-04	38.563	0.084	21.201	27.772	0.911	4.866	7.67	0	0.009	0.024	101.1	2.99121	0.00490099	1.93815	1.73246	0.0690543	0.059852	0.562673	0.637447	0	0.000890587	0.00147186	0.188032	0.578948	0.213019	0.0200011	0.245159	0.754841
	CD01G2-Line-05	38.401	0	21.213	28.499	1.007	5.039	7.106	0.014	0.004	0	101.283	2.97406	0	1.93627	1.72773	0.118105	0.0660575	0.581782	0.589666	0.00210224	0.000395208	0	0.196201	0.582662	0.19886	0.0222773	0.251907	0.748093
	CD01G2-Line-06	38.321	0.014	21.585	28.493	1.026	5.068	7.109	0	0	0	101.616	2.9549	0.000812014	1.96162	1.71042	0.126963	0.0670098	0.582574	0.587337	0	0	0	0.197661	0.580327	0.199277	0.0227357	0.254067	0.745933
	CD01G2-Line-07	38.626	0	21.34	29.01	0.932	5.101	6.853	0.022	0	0	101.884	2.97506	0	1.93717	1.75262	0.115992	0.060802	0.585707	0.565549	0.00328538	0	0	0.197561	0.591168	0.190762	0.0205088	0.250481	0.749519
	CD01G2-Line-08	38.395	0.028	21.142	29.318	1.186	4.761	6.489	0	0	0.013	101.332	2.98455	0.00163716	1.9369	1.81594	0.089934	0.0780861	0.55171	0.540449	0	0	0.000798962	0.184754	0.608114	0.180983	0.0261491	0.23302	0.76698
	CD46G2-Line-01	37.587	0.113	20.501	31.501	1.271	2.597	6.744	0	0.009	0.018	100.341	2.99501	0.00677281	1.92527	2.02821	0.070935	0.0857811	0.30849	0.575774	0	0.000914876	0.001134	0.10289	0.676463	0.192037	0.0286104	0.13202	0.86798
	CD46G2-Line-02	37.655	0.014	20.8	31.147	1.234	2.86	6.964	0.019	0.006	0	100.699	2.98127	0.000833751	1.94088	1.96386	0.0984374	0.0827521	0.337562	0.590759	0.00291661	0.000606022	0	0.113469	0.660136	0.198579	0.0278165	0.146675	0.853325
	CD46G2-Line-03	37.948	0	20.229	31.297	1.151	2.895	6.925	0.041	0	0	100.486	3.01316	0	1.89306	1.9913	0.0869275	0.0774095	0.342682	0.589151	0.00631196	0	0	0.114207	0.663646	0.196348	0.0257985	0.146823	0.853177
	CD46G2-Line-04	37.531	0.054	20.61	30.995	1.19	3.028	6.918	0	0	0.028	100.354	2.97875	0.0032238	1.92787	1.95086	0.106413	0.0799975	0.358269	0.588299	0	0	0.00175704	0.120328	0.655217	0.197586	0.026868	0.155153	0.844847
	CD46G2-Line-05	37.829	0.091	20.819	31.007	1.201	2.901	6.88	0	0.004	0	100.732	2.99274	0.00541521	1.94116	1.98851	0.0629331	0.0804771	0.342138	0.583185	0	0.000403704	0	0.114262	0.664097	0.194764	0.0268767	0.146799	0.853201
	CD46G2-Line-06	37.458	0.036	20.582	31.046	1.121	2.973	7.039	0.008	0	0	100.263	2.97412	0.00215004	1.92601	1.93879	0.122679	0.0753885	0.351899	0.598823	0.00123155	0	0	0.118688	0.653914	0.201971	0.025427	0.153622	0.846378
	CD46G2-Line-07	37.945	0.014	20.566	31.441	1.123	2.87	6.942	0	0	0	100.901	3.00077	0.000832791	1.91683	1.99941	0.0799582	0.0752217	0.338352	0.588215	0	0	0	0.112739	0.666203	0.195994	0.0250639	0.144734	0.855266
Clinopyroxene	Point	SiO2	TiO2	Al2O3	FeOT	MnO	MgO	CaO	Na2O	K2O	Cr2O3	Sum	Si	Ti	Al	Fe2+	Fe3+	Mn	Mg	Ca	Na	K	Cr	X(En)	X(Wo)	X(Fs)	Mg#
Inclusion-type	CD03-C1-96	52.39	0.35	3.12	10.19	0.08	11.46	21.22	1.04	0	0	99.85	1.96297	0.00986421	0.137777	0.319297	0	0.00253887	0.640115	0.851889	0.0755517	0	0	0.353401	0.470319	0.17628	0.667195
	CD03-C1-97	51.92	0.31	3.24	10.36	0.06	11.34	21.2	1.05	0	0	99.48	1.95294	0.00877091	0.143633	0.325889	0	0.00191157	0.63588	0.854403	0.0765754	0	0	0.350121	0.470442	0.179437	0.661157
	CD03-C1-98	52.53	0.32	3.14	10.16	0.04	11.51	21.33	0.96	0.01	0	100	1.96578	0.00900756	0.138488	0.317964	0	0.00126786	0.642113	0.855247	0.0696539	0.000477404	0	0.353718	0.471127	0.175155	0.668814
	CD03-C1-99	52.19	0.34	3.08	9.9	0.09	11.88	21.73	0.78	0	0	99.99	1.95219	0.00956627	0.135782	0.309689	0	0.00285142	0.662459	0.870897	0.0565686	0	0	0.359437	0.472532	0.168031	0.681439
		52.2575	0.33	3.145	10.1525	0.0675	11.5475	21.37	0.9575	0.0025	0	99.83
Matrix-type	CD03C2-Line1-01	51.488	0.159	2.453	11.291	0.197	11.32	22.133	0.746	0.005	0.017	99.809	1.93994	0.00450618	0.108927	0.299359	0.056412	0.00628686	0.635824	0.893502	0.0544963	0.000240331	0.000506419	0.347695	0.488603	0.163702	0.679893
	CD03C2-Line1-02	50.738	0.261	3.256	12.442	0.221	10.7	21.678	0.842	0.001	0	100.139	1.91147	0.00739612	0.144569	0.312742	0.0792524	0.00705198	0.600933	0.875036	0.0615024	4.8061e-05	0	0.335959	0.489199	0.174842	0.65771
	CD03C2-Line1-03	50.48	0.288	3.257	12.584	0.208	10.779	21.553	0.884	0.006	0.031	100.07	1.90226	0.00816343	0.144652	0.298124	0.0984514	0.00663895	0.605533	0.870225	0.0645876	0.000288443	0.000923616	0.34136	0.490577	0.168063	0.670092
	CD03C2-Line1-04	50.11	0.373	3.59	14.53	0.268	10.752	19.587	0.85	0	0.011	100.071	1.89682	0.0106204	0.160159	0.372939	0.0870238	0.00859252	0.606734	0.794404	0.062383	0	0.000329209	0.342	0.447785	0.210216	0.619323
	CD03C2-Line1-05	50.311	0.314	3.651	12.538	0.228	10.485	21.467	0.998	0	0.067	100.059	1.89558	0.00889893	0.162124	0.295227	0.0998331	0.0072761	0.588919	0.866609	0.0729047	0	0.00199587	0.33638	0.494992	0.168628	0.666088
	CD03C2-Line1-06	50.197	0.303	3.628	12.909	0.213	10.283	21.344	1.041	0	0	99.918	1.89561	0.00860682	0.161471	0.30136	0.106319	0.00681295	0.578894	0.863614	0.0762198	0	0	0.33196	0.495229	0.172811	0.657644
	CD03C2-Line1-07	50.397	0.324	3.548	13.292	0.253	10.337	21.022	0.92	0.013	0.06	100.166	1.90295	0.00920232	0.157893	0.335742	0.0839877	0.00809149	0.58187	0.850492	0.0673531	0.000626217	0.00179124	0.329093	0.481019	0.189888	0.634114
	CD03C2-Line1-08	50.506	0.247	3.352	12.614	0.269	10.497	21.637	0.959	0	0.006	100.087	1.90382	0.00700342	0.148917	0.298305	0.0993374	0.00858858	0.589872	0.873885	0.0700889	0	0.000178819	0.334762	0.495944	0.169293	0.664138
	CD03C2-Line1-09	50.736	0.23	3.1	12.417	0.237	10.664	21.694	1.026	0.014	0	100.118	1.90923	0.00651028	0.137486	0.284202	0.106562	0.00755398	0.598234	0.874691	0.0748576	0.000672092	0	0.340461	0.497796	0.161743	0.677934
	CD03C2-Line1-10	51.456	0.306	2.693	12.068	0.209	10.742	21.51	0.939	0.017	0.007	99.947	1.94042	0.00867983	0.119689	0.329214	0.0513707	0.00667562	0.603885	0.869108	0.068655	0.000817839	0.000208707	0.335081	0.482247	0.182673	0.647182
	CD03C2-Line2-01	50.925	0.197	2.264	11.519	0.25	11.241	22.556	0.819	0.017	0.024	99.812	1.91868	0.00558299	0.100532	0.252067	0.110878	0.00797803	0.63137	0.910555	0.0598275	0.000817106	0.000714926	0.351936	0.507558	0.140506	0.714675
	CD03C2-Line2-02	51.11	0.173	2.86	12.641	0.256	10.751	21.899	0.886	0	0.031	100.607	1.91692	0.00488061	0.126421	0.303009	0.0934839	0.00813249	0.601113	0.880027	0.0644286	0	0.000919261	0.336918	0.493247	0.169834	0.664858
	CD03C2-Line2-03	50.655	0.287	3.009	12.54	0.23	10.434	21.488	0.866	0	0.04	99.549	1.92179	0.00819022	0.134543	0.329875	0.0679916	0.0073909	0.590125	0.873481	0.0637013	0	0.00119984	0.329039	0.487031	0.18393	0.64144
	CD03C2-Line2-04	50.51	0.302	3.111	12.524	0.253	10.589	21.7	0.929	0.007	0.034	99.959	1.90628	0.00857325	0.138377	0.296063	0.0992201	0.00808751	0.595762	0.877489	0.0679784	0.000337028	0.00101453	0.336719	0.495949	0.167332	0.668026
	CD03C2-Line2-05	50.722	0.235	3.157	12.653	0.236	10.523	21.431	0.95	0.002	0.081	99.99	1.91478	0.00667297	0.14046	0.315606	0.0838522	0.00754604	0.592202	0.866837	0.0695331	9.63186e-05	0.00241761	0.333702	0.488457	0.177842	0.652343
	CD03C2-Line2-06	50.309	0.222	3.123	12.538	0.255	10.61	21.516	0.957	0.018	0.097	99.645	1.90414	0.00632026	0.139309	0.28889	0.10797	0.00817481	0.598655	0.872544	0.0702281	0.000869128	0.00290271	0.340128	0.495739	0.164134	0.674507
	CD03C2-Line2-07	50.895	0.206	2.958	12.256	0.227	10.957	21.84	0.861	0	0.063	100.263	1.91277	0.00582351	0.131021	0.292549	0.0926566	0.00722601	0.613886	0.879455	0.062739	0	0.00187201	0.343743	0.492446	0.163811	0.677253
	CD03C2-Line2-08	51.873	0.166	2.174	11.543	0.236	11.222	22.45	0.717	0.019	0.027	100.427	1.94566	0.00468341	0.0961037	0.306608	0.055468	0.00749759	0.627485	0.902224	0.0521423	0.000909153	0.000800695	0.341709	0.491322	0.166969	0.671759
Corona-type 1	CD03C3-59	50.607	0.168	2.631	12.368	0.216	10.932	21.94	0.801	0.003	0.044	99.71	1.91336	0.00477778	0.117237	0.287033	0.104027	0.00691713	0.616162	0.888785	0.0587173	0.000144699	0.00131528	0.343844	0.495979	0.160176	0.682203
	CD03C3-60	51.028	0.167	2.391	12.08	0.25	10.987	22.087	0.814	0.007	0	99.811	1.92695	0.00474359	0.106414	0.291349	0.0901414	0.00799625	0.618513	0.893657	0.059598	0.000337223	0	0.342948	0.495507	0.161545	0.679787
	CD03C3-61	51.198	0.232	2.767	12.45	0.237	10.527	21.856	0.854	0	0	100.121	1.93138	0.00658314	0.123021	0.329267	0.0635059	0.00757267	0.59201	0.883404	0.0624626	0	0	0.328041	0.489507	0.182451	0.642597
	CD03C3-80	50.915	0.173	2.257	11.241	0.199	11.525	22.389	0.747	0	0	99.446	1.92302	0.00491489	0.100468	0.256697	0.0983615	0.00636615	0.648915	0.906038	0.0547023	0	0	0.35819	0.500118	0.141692	0.716549
	CD03C3-81	51.391	0.215	2.17	11.113	0.253	11.663	22.617	0.779	0.021	0	100.222	1.92513	0.00605817	0.0958052	0.248747	0.0993979	0.00802748	0.651317	0.907782	0.0565793	0.00100358	0	0.360272	0.502135	0.137593	0.723634
	CD03C3-82	50.815	0.225	2.809	11.226	0.229	11.56	22.201	0.852	0.012	0	99.929	1.90688	0.00635102	0.124234	0.240434	0.111866	0.00727867	0.646693	0.892642	0.0619894	0.000574475	0	0.363358	0.501549	0.135093	0.728974
	CD03C3-83	51.07	0.178	2.391	11.554	0.26	11.827	22.207	0.803	0.016	0.014	100.32	1.91062	0.00500909	0.105425	0.239587	0.121905	0.00823887	0.659618	0.890169	0.0582467	0.000763639	0.000414111	0.368631	0.497475	0.133894	0.733557
Corona-type 2	CD03C4-67	51.241	0.229	2.788	10.907	0.195	11.878	22.142	0.705	0	0.01	100.095	1.91897	0.00645082	0.123055	0.264591	0.077004	0.00618543	0.663135	0.888464	0.05119	0	0.000296093	0.365124	0.489191	0.145685	0.714796
	CD03C4-69	50.816	0.177	2.698	11.204	0.208	11.064	21.985	0.796	0	0.034	98.982	1.93043	0.00505773	0.120796	0.290104	0.0658407	0.0066927	0.626576	0.894855	0.058629	0	0.0010212	0.345881	0.493976	0.160142	0.683528
Inclusion-type	CD01C1-35	52.67	0.15	1.87	9.82	0.14	12.35	20.77	1.01	0	0	98.78	1.98866	0.00426007	0.0832135	0.310073	0	0.00447723	0.695139	0.840245	0.0739374	0	0	0.376676	0.455305	0.16802	0.691535
	CD01C1-36	52.58	0.14	1.82	10.33	0.14	12.29	21.19	0.69	0.01	0	99.19	1.98483	0.00397521	0.080971	0.326106	0	0.00447626	0.691612	0.85705	0.0505007	0.000481571	0	0.368905	0.45715	0.173945	0.679572
	CD01C1-37	53.19	0.13	1.74	9.89	0.16	12.71	20.76	0.67	0.02	0.014	99.284	2.00225	0.00368096	0.0771958	0.311344	0	0.00510145	0.713251	0.837315	0.0489001	0.000960455	0.000414111	0.383075	0.449707	0.167218	0.69613
Matrix-type	CD01C2-Line-01	51.891	0.214	2.52	11.36	0.225	11.778	22.249	0.829	0	0.042	101.108	1.9256	0.00597333	0.110212	0.267477	0.0850623	0.00707198	0.651558	0.88462	0.059645	0	0.00123226	0.361243	0.49046	0.148297	0.708959
	CD01C2-Line-02	51.254	0.112	2.687	11.583	0.149	11.529	21.588	0.699	0	0.003	99.604	1.93278	0.0031769	0.119421	0.30561	0.0596753	0.00475912	0.64812	0.87225	0.0511069	0	8.94449e-05	0.354944	0.477689	0.167368	0.679563
	CD01C2-Line-03	51.465	0.252	2.832	11.826	0.085	11.27	21.82	0.781	0.001	0.061	100.393	1.92808	0.00710137	0.125044	0.310941	0.0595737	0.00269722	0.629426	0.87587	0.0567296	4.77937e-05	0.00180684	0.346555	0.482244	0.171201	0.66934
	CD01C2-Line-04	50.998	0.228	3.051	11.88	0.209	11.259	21.841	0.876	0.012	0	100.354	1.9071	0.00641333	0.134468	0.268926	0.102602	0.00661989	0.627665	0.875115	0.063514	0.000572478	0	0.354271	0.493939	0.15179	0.700057
	CD01C2-Line-05	51.483	0.213	3.301	12.276	0.194	11.079	21.545	0.874	0.009	0.045	101.019	1.9183	0.00596981	0.144962	0.313779	0.0687506	0.00612264	0.615405	0.860144	0.0631407	0.000427812	0.00132569	0.343931	0.480708	0.175361	0.662307
	CD01C2-Line-06	51.558	0.238	3.125	11.63	0.183	11.007	21.947	0.906	0.014	0.087	100.695	1.92617	0.00668814	0.137596	0.30295	0.0604082	0.00579075	0.613022	0.878511	0.0656256	0.000667245	0.00256979	0.341615	0.489562	0.168823	0.669259
	CD01C2-Line-07	51.594	0.184	2.762	11.771	0.199	11.297	22.059	0.906	0	0.028	100.8	1.92406	0.00516138	0.121394	0.282253	0.0848501	0.00628575	0.628045	0.88141	0.0655079	0	0.000825573	0.350529	0.491938	0.157533	0.689933
	CD01C2-Line-08	52.068	0.16	2.066	11.154	0.142	12.064	22.544	0.697	0	0.07	100.965	1.93527	0.00447321	0.0905016	0.268513	0.078189	0.00447037	0.668451	0.897789	0.0502284	0	0.00205706	0.364328	0.489324	0.146348	0.713422
Inclusion-type	CD46C1-24	52.54	0.15	1.11	13.18	0.14	11.16	20.75	0.66	0	0.042	99.732	1.99675	0.00428799	0.0497178	0.418895	0	0.00450657	0.632275	0.844937	0.0486322	0	0	0.33346	0.445617	0.220923	0.601497
	CD46C1-38	52.41	0.15	1.25	13.65	0.14	10.63	20.67	0.68	0	0.003	99.583	1.99958	0.00430472	0.056207	0.435525	0	0.00452415	0.604597	0.844963	0.0503013	0	0	0.320727	0.448236	0.231037	0.581275
Matrix-type	CD46C2-14	51.582	0.104	1.644	16.417	0.187	9.901	20.206	0.7	0.004	0.043	100.788	1.95843	0.00297012	0.0735646	0.467207	0.0540601	0.00601364	0.5604	0.821986	0.0515294	0.000193744	0.0012908	0.302986	0.444414	0.2526	0.545345
	CD46C2-15	51.683	0.199	1.769	15.188	0.195	9.477	20.666	0.827	0	0.008	100.012	1.9735	0.00571573	0.079611	0.46206	0.0229444	0.0063068	0.539472	0.84551	0.0612267	0	0.000241523	0.292073	0.457764	0.250162	0.538647
	CD46C2-16	51.19	0.137	1.847	15.354	0.167	9.249	20.818	0.766	0.008	0.014	99.55	1.96787	0.00396151	0.0836823	0.463896	0.0297194	0.00543766	0.530047	0.857478	0.0570934	0.000392337	0.000425518	0.286292	0.463146	0.250562	0.533277
	CD46C2-17	51.729	0.141	1.834	15.532	0.263	9.591	20.398	0.685	0.007	0.011	100.191	1.97613	0.00405163	0.0825728	0.488399	0.00780973	0.00850986	0.546203	0.834915	0.0507363	0.000341144	0.000332241	0.292162	0.446594	0.261244	0.527935
	CD46C2-18	51.004	0.174	1.604	15.938	0.247	9.677	20.452	0.728	0	0.016	99.84	1.95555	0.00501814	0.072481	0.451014	0.0600244	0.00802132	0.553112	0.840181	0.054118	0	0.000485023	0.299902	0.455554	0.244544	0.550839
Inclusion-type	CD32C1-12	53.4	0.19	2.18	8.77	0.24	13.11	21.35	0.76	0	0.11	100.11	1.98458	0.00531143	0.0954862	0.296318	-0.0237443	0.00755482	0.726339	0.850157	0.0547631	0	0.00323221	0.387833	0.453946	0.158221	0.710247
	CD32C1-13	53.39	0.21	2.23	8.7	0.32	13.03	21.21	0.67	0	0.094	99.854	1.99075	0.00588988	0.0979983	0.316908	-0.0456187	0.0101063	0.724287	0.847367	0.0484372	0	0.00277118	0.383512	0.448684	0.167804	0.69563
	CD32C1-14	52.9	0.18	2.55	9.27	0.29	12.93	21.03	0.82	0	0	99.97	1.96868	0.00503873	0.111845	0.288614	-0.000108176	0.00914117	0.717341	0.838554	0.0591669	0	0	0.388906	0.454622	0.156472	0.713095
Matrix-type	CD32C2-3	51.713	0.234	3.236	10.081	0.313	12.487	21.311	0.801	0	0.11	100.286	1.92443	0.00655009	0.141928	0.263062	0.0506725	0.00986578	0.692738	0.849726	0.0577938	0	0.00323648	0.383676	0.470625	0.145698	0.724773
	CD32C2-4	51.665	0.177	3.306	10.314	0.317	12.554	21.276	0.794	0	0.094	100.497	1.91808	0.0049428	0.144654	0.256533	0.0636905	0.00996816	0.694803	0.846318	0.0571528	0	0.00275916	0.386505	0.47079	0.142705	0.730344
	CD32C2-5	51.649	0.263	3.37	10.065	0.315	12.405	20.771	0.804	0.007	0	99.649	1.93324	0.00740474	0.148666	0.286339	0.028722	0.00998666	0.692197	0.833019	0.0583481	0.000334257	0	0.382101	0.459837	0.158062	0.70738
	CD32C2-6	51.731	0.234	3.162	10.212	0.278	12.276	21.011	0.825	0	0.039	99.768	1.93633	0.00658832	0.139491	0.286281	0.033385	0.00881372	0.685006	0.842653	0.0598728	0	0.00115418	0.377634	0.464543	0.157823	0.705256
	CD32C2-7	51.577	0.195	3.35	10.675	0.319	12.482	20.92	0.817	0	0.008	100.343	1.9181	0.00545481	0.146831	0.267272	0.064729	0.0100483	0.692004	0.833586	0.0589093	0	0.000235226	0.385977	0.464947	0.149076	0.721381
Hornblende	Point	SiO2	TiO2	Al2O3	FeOT	MnO	MgO	CaO	Na2O	K2O	Cr2O3	Sum	Si	Ti	Al	Fe2+	Fe3+	Mn	Mg	Ca	Na	K	Cr	Mg#
Matrix-type	CD03H2-Line1-01	41.209	2.62	11.544	18.342	0.134	8.831	11.343	1.68	1.65	0.038	97.391	6.30083	0.301326	2.08026	2.28237	0.0629826	0.0173538	2.01291	1.85826	0.498036	0.321846	0	0.468633
	CD03H2-Line1-02	40.985	2.48	11.862	18.661	0.128	8.663	11.504	1.556	1.685	0.015	97.539	6.2573	0.284802	2.1344	2.2484	0.134212	0.0165523	1.97169	1.88185	0.460594	0.328186	0	0.467216
	CD03H2-Line1-03	40.966	2.506	11.633	18.668	0.142	8.722	11.289	1.622	1.609	0.015	97.172	6.27268	0.288629	2.09931	2.23323	0.157236	0.0184163	1.99092	1.85207	0.481534	0.3143	0	0.471318
	CD03H2-Line1-04	40.788	2.525	11.76	18.471	0.162	8.684	11.483	1.607	1.622	0.033	97.135	6.2532	0.29118	2.12488	2.23563	0.132558	0.0210363	1.98472	1.88625	0.477675	0.317234	0	0.470273
	CD03H2-Line1-05	40.831	2.604	11.619	18.535	0.126	8.693	11.37	1.68	1.639	0.008	97.105	6.26657	0.300615	2.10167	2.28147	0.097496	0.0163793	1.98892	1.86971	0.499914	0.320906	0	0.465747
	CD03H2-Line1-06	40.962	2.394	11.893	18.545	0.153	8.761	11.331	1.662	1.69	0	97.391	6.25775	0.2751	2.14133	2.2245	0.144796	0.0197976	1.99526	1.85472	0.492283	0.329369	0	0.472837
	CD03H2-Line1-07	41.038	2.458	11.825	18.997	0.192	8.665	11.373	1.497	1.606	0	97.651	6.2455	0.28138	2.12099	2.16775	0.250063	0.0247496	1.96589	1.85451	0.441722	0.311807	0	0.475583
	CD03H2-Line1-08	41.177	2.448	11.664	18.506	0.142	8.678	11.379	1.565	1.648	0.05	97.257	6.30166	0.2818	2.1038	2.26497	0.103508	0.0184066	1.97983	1.86585	0.464367	0.321748	0	0.466414
	CD03H2-Line1-09	40.807	2.489	11.883	18.68	0.18	8.707	11.348	1.581	1.625	0	97.3	6.23549	0.286082	2.14002	2.18208	0.205011	0.0232967	1.98341	1.85793	0.468397	0.316773	0	0.476153
	CD03H2-Line1-10	41.183	2.525	11.794	18.592	0.182	8.767	11.381	1.613	1.552	0.03	97.619	6.27005	0.289164	2.11627	2.20449	0.162709	0.0234698	1.98981	1.85655	0.476139	0.301442	0	0.474408
	CD03H2-Line1-11	41.233	2.426	11.827	18.112	0.172	8.611	11.47	1.61	1.653	0.053	97.167	6.3182	0.27962	2.13589	2.30836	0.0126136	0.0223235	1.96703	1.88315	0.478323	0.323132	0	0.460081
	CD03H2-Line1-12	41.128	2.321	11.618	18.076	0.133	8.943	11.78	1.431	1.605	0.023	97.058	6.29235	0.267104	2.0949	2.17453	0.138242	0.017235	2.0397	1.93105	0.424484	0.313263	0	0.484003
	CD03H2-Line1-13	40.996	2.412	11.827	18.491	0.159	8.719	11.473	1.585	1.553	0.059	97.274	6.26702	0.277349	2.13084	2.20795	0.155988	0.0205874	1.98699	1.87919	0.469781	0.302865	0	0.473663
	CD03H2-Line1-14	40.78	2.334	11.788	18.382	0.156	9.047	11.475	1.562	1.625	0	97.149	6.22891	0.268161	2.12208	2.09443	0.253655	0.0201825	2.06005	1.87798	0.462586	0.316648	0	0.495863
	CD03H2-Line1-15	41.302	2.348	11.512	17.965	0.187	8.997	11.681	1.515	1.556	0.02	97.083	6.31379	0.269989	2.07408	2.17553	0.121161	0.0242128	2.05034	1.91325	0.449033	0.30345	0	0.485188
																							0
Corona-type 1	CD03H3-21	41.11	2.197	11.705	17.46	0.119	9.294	11.646	1.561	1.475	0.035	96.602	6.29547	0.25307	2.11256	2.08768	0.14837	0.0154352	2.12174	1.91087	0.463479	0.288158	0	0.504046
	CD03H3-22	41.673	2.377	11.39	17.49	0.111	9.187	11.757	1.539	1.559	0	97.083	6.36502	0.273088	2.05033	2.22552	0.00851731	0.0143599	2.09183	1.92404	0.455753	0.303773	0	0.484517
	CD03H3-23	41.501	2.215	11.441	17.025	0.129	9.513	11.668	1.514	1.635	0.038	96.679	6.3498	0.25492	2.0631	2.11047	0.0679641	0.0167177	2.16984	1.91281	0.449132	0.319137	0	0.506935
	CD03H3-24	41.459	2.243	11.539	17.379	0.115	9.543	11.694	1.475	1.477	0.018	96.942	6.31349	0.256927	2.07098	2.03542	0.177834	0.0148332	2.16643	1.90804	0.435501	0.286939	0	0.515589
Corona-type 2	CD03H4-105	41.82	0.41	13.15	15.37	0.18	10.76	11.3	1.8	1.58	0	96.37	6.30657	0.0465075	2.33717	1.60483	0.333551	0.0229915	2.41897	1.82583	0.526294	0.303966	0	0.601165
	CD03H4-106	40.32	1.04	14.81	16.35	0.2	9.73	11.3	1.72	1.83	0	97.3	6.06467	0.117666	2.62541	1.685	0.371645	0.0254801	2.18176	1.82112	0.501604	0.351153	0	0.564235
	CD03H4-107	42.89	0.59	12.76	15.49	0.22	11.23	11.38	1.81	1.43	0	97.8	6.35539	0.0657609	2.2284	1.54885	0.370673	0.0276117	2.4807	1.80676	0.520009	0.270322	0	0.615627
Matrix-type	CD01H2-4	41.622	1.87	12.057	17.796	0.143	9.477	11.645	1.492	1.557	0.06	97.719	6.28655	0.212452	2.14627	1.98868	0.259175	0.0182941	2.13387	1.88452	0.436923	0.30001	0	0.51761
	CD01H2-5	42.395	2.125	11.498	17.432	0.089	9.524	11.658	1.369	1.656	0	97.746	6.40253	0.241394	2.04652	2.12398	0.0776329	0.0113845	2.1442	1.8864	0.400855	0.319048	0	0.502369
	CD01H2-6	41.904	2.183	11.507	17.999	0.061	9.433	11.497	1.469	1.826	0.052	97.931	6.34308	0.248558	2.05288	2.14674	0.131763	0.00782096	2.12865	1.86467	0.431135	0.352618	0	0.497884
	CD01H2-7	41.715	1.918	11.576	17.957	0.087	9.361	11.572	1.268	1.722	0.025	97.201	6.34061	0.219289	2.07374	2.05007	0.232525	0.0112006	2.12114	1.8846	0.373684	0.333911	0	0.508519
	CD01H2-8	41.778	2.338	11.78	17.963	0.054	9.481	11.49	1.459	1.735	0.076	98.154	6.30064	0.265223	2.09381	2.09217	0.173371	0.00689788	2.13157	1.85665	0.426617	0.333807	0	0.504664
	CD01H2-9	41.428	2.062	11.873	17.534	0.07	9.353	11.621	1.493	1.753	0.035	97.222	6.31012	0.236245	2.13138	2.12021	0.113266	0.00903082	2.12375	1.89653	0.44091	0.340631	0	0.500417
Inclusion-type	CD46H1-26	42.53	1.91	10.51	20.28	0.08	7.87	10.48	1.81	1.63	0	97.1	6.55648	0.221482	1.90956	2.64615	-0.0315846	0.010446	1.80867	1.73105	0.541004	0.320569	0	0.406003
	CD46H1-27	42.56	2.03	10.19	20.22	0.1	7.8	10.68	1.89	1.52	0.034	97.024	6.58186	0.236141	1.85728	2.71766	-0.102587	0.0130988	1.79825	1.76967	0.566702	0.299881	0	0.398203
Matrix-type	CD46H2-9	41.072	2.139	10.689	21.368	0.096	7.335	10.666	1.653	1.572	0	96.59	6.39166	0.250385	1.96047	2.58875	0.192161	0.0126539	1.70167	1.77845	0.498755	0.312089	0	0.396621
	CD46H2-10	40.987	2.155	11.197	22.539	0.103	7.382	10.71	1.905	1.663	0.034	98.675	6.26611	0.247816	2.01748	2.54233	0.339327	0.0133375	1.68242	1.75434	0.564668	0.324342	0	0.398229
	CD46H2-11	41.037	1.697	10.728	21.053	0.096	7.464	10.866	1.671	1.523	0.021	96.156	6.40708	0.199295	1.97405	2.53878	0.21009	0.0126952	1.73726	1.81772	0.505833	0.303349	0	0.406278
	CD46H2-12	41.574	2.093	10.785	21.501	0.076	7.281	10.938	1.862	1.651	0	97.761	6.41794	0.243037	1.96223	2.72994	0.0458574	0.00993739	1.67561	1.80919	0.557314	0.325147	0	0.380341
	CD46H2-13	41.612	1.928	10.941	21.65	0.129	7.515	10.767	1.815	1.622	0.008	97.987	6.38486	0.22252	1.97854	2.56858	0.209508	0.0167652	1.71898	1.77011	0.539953	0.317499	0	0.400922
Matrix-type	CD32H2-Line1-01	43.165	1.848	10.773	14.024	0.196	11.97	11.24	1.487	1.513	0.054	96.27	6.48374	0.208797	1.90716	1.52816	0.233498	0.0249365	2.68038	1.80898	0.433063	0.289929	0	0.636891
	CD32H2-Line1-02	42.096	1.936	11.481	14.518	0.226	11.502	11.425	1.546	1.732	0.065	96.527	6.35022	0.219676	2.04119	1.60738	0.224131	0.0288763	2.5866	1.84662	0.452172	0.333315	0	0.616741
	CD32H2-Line1-03	42.02	2.064	11.409	14.59	0.126	11.437	11.529	1.576	1.717	0.141	96.609	6.35068	0.234641	2.03221	1.6827	0.161361	0.0161295	2.57682	1.86693	0.461813	0.331049	0	0.604956
	CD32H2-Line1-04	41.802	2.072	11.444	14.848	0.224	11.244	11.413	1.528	1.733	0.005	96.313	6.33002	0.236008	2.0424	1.65316	0.227156	0.0287304	2.53827	1.85174	0.448619	0.334784	0	0.605585
	CD32H2-Line1-05	41.47	1.978	11.599	14.878	0.144	11.297	11.467	1.623	1.745	0.076	96.277	6.29262	0.225763	2.07431	1.65227	0.235709	0.0185074	2.55546	1.86432	0.477488	0.337794	0	0.607325
	CD32H2-Line1-06	41.697	2.13	11.576	14.9	0.293	11.429	11.36	1.563	1.688	0.041	96.677	6.28185	0.241375	2.05541	1.54783	0.329436	0.0373883	2.56685	1.83373	0.45655	0.324425	0	0.623827
	CD32H2-Line1-07	41.746	2.131	11.769	14.927	0.24	11.152	11.455	1.667	1.733	0.024	96.844	6.29818	0.241832	2.09265	1.69029	0.193049	0.0306688	2.5082	1.85169	0.487621	0.333547	0	0.597405
	CD32H2-Line1-08	42.386	1.834	11.304	14.956	0.167	11.826	11.376	1.555	1.661	0.103	97.168	6.34208	0.206414	1.99341	1.52243	0.349033	0.0211646	2.63788	1.82378	0.451114	0.317057	0	0.634059
Plagioclase	Point	SiO2	TiO2	Al2O3	FeOT	MnO	MgO	CaO	Na2O	K2O	Cr2O3	Sum	Si	Ti	Al	Fe3+	Mn	Mg	Ca	Na	K	Cr	An	Ab	Or
Inclusion-type	CD03P1-100	59.79	0	24.09	0.32	0.03	0	6.95	7.84	0.3	0	99.32	2.69174	0	1.2782	0.0120479	0.00114396	0	0.335245	0.684333	0.01723	0	0.323344	0.660038	0.0166183
	CD03P1-101	60.3	0	24.03	0.27	0	0	7.03	7.73	0.29	0	99.65	2.70224	0	1.26916	0.0101187	0	0	0.337548	0.671634	0.0165792	0	0.329071	0.654767	0.0161628
	CD03P1-102	60.36	0	24.21	0.3	0	0	6.95	7.78	0.26	0	99.86	2.69878	0	1.27576	0.0112175	0	0	0.332948	0.674441	0.0148303	0	0.325711	0.659781	0.0145079
		60.15	0	24.11	0.296667	0.01	0	6.97667	7.78333	0.283333	0	99.61
Matrix-type	CD03P2- Line1-01	60.058	0	25.247	0.124	0.01	0	6.91	6.923	0.324	0	99.596	2.68141	0	1.32849	0.00462989	0.000378162	0	0.330555	0.599286	0.0184543	0	0.348579	0.631961	0.0194605
	CD03P2- Line1-02	60.334	0.029	24.472	0.094	0.036	0.008	6.438	7.067	0.505	0.02	99.003	2.70874	0.000979339	1.29488	0.00352931	0.00136897	0.000535432	0.309692	0.615158	0.0289238	0	0.324701	0.644973	0.0303256
	CD03P2- Line1-03	61.241	0	24.55	0.04	0.03	0.007	6.057	7.115	0.427	0	99.467	2.7277	0	1.28873	0.00148995	0.00113178	0.000464795	0.289058	0.614436	0.0242628	0	0.311567	0.662281	0.0261521
	CD03P2- Line1-04	60.546	0.034	24.616	0.05	0.03	0	6.25	7.081	0.343	0.027	98.977	2.71294	0.00114594	1.29995	0.00187362	0.00113857	0	0.30006	0.615171	0.0196068	0	0.320975	0.658051	0.0209735
	CD03P2- Line1-05	60.123	0	24.763	0.074	0	0	6.179	7.427	0.369	0.037	98.972	2.69935	0	1.31032	0.00277847	0	0	0.297242	0.646515	0.0211351	0	0.308057	0.670039	0.0219041
	CD03P2- Line1-06	61.814	0.055	24.413	0.08	0	0	5.828	7.231	0.423	0.049	99.893	2.7394	0.00183341	1.2751	0.00296493	0	0	0.276733	0.621316	0.0239148	0	0.300156	0.673905	0.025939
	CD03P2- Line1-07	60.701	0.095	24.028	0.036	0	0	5.855	7.414	0.49	0	98.619	2.7308	0.00321475	1.27399	0.00135442	0	0	0.282224	0.646685	0.0281221	0	0.294895	0.67572	0.0293848
	CD03P2- Line1-08	60.715	0.063	24.194	0.084	0.016	0	6.051	7.302	0.424	0.017	98.866	2.7252	0.00212702	1.27987	0.0031531	0.000608285	0	0.291006	0.635463	0.0242788	0	0.306081	0.668382	0.0255365
	CD03P2- Line1-09	60.948	0	24.27	0.094	0	0	5.878	7.264	0.5	0.032	98.986	2.73038	0	1.28141	0.00352166	0	0	0.282141	0.630937	0.0285754	0	0.299623	0.670031	0.030346
	CD03P2- Line1-10	61.092	0	24.789	0.068	0.034	0	5.829	7.633	0.196	0	99.641	2.71726	0	1.29946	0.00252937	0.00128089	0	0.277789	0.658247	0.0111215	0	0.293287	0.694971	0.0117419
Corona-type	CD03P3-06	61.68	0	24.692	0.289	0.019	0	6.03	7.279	0.25	0	100.239	2.72699	0	1.28663	0.0106855	0.000711506	0	0.285647	0.623962	0.0141006	0	0.309239	0.675495	0.0152652
	CD03P3-07	60.95	0.059	24.576	0.286	0.017	0	6.298	7.598	0.301	0	100.085	2.70896	0.00197247	1.28735	0.0106305	0.000639976	0	0.29992	0.65475	0.0170669	0	0.308643	0.673793	0.0175633
	CD03P3-08	60.665	0	24.681	0.308	0	0.012	6.397	7.263	0.258	0	99.584	2.70664	0	1.29781	0.0114921	0	0.000798145	0.305803	0.628282	0.0146849	0	0.322315	0.662207	0.0154778
	CD03P3-09	61.157	0	24.83	0.273	0	0.003	6.239	7.149	0.309	0	99.96	2.71366	0	1.2985	0.0101304	0	0.000198445	0.296618	0.615037	0.0174915	0	0.319237	0.661938	0.0188253
	CD03P3-10	60.449	0	24.698	0.379	0.045	0.034	6.26	7.164	0.224	0	99.253	2.70492	0	1.30252	0.0141827	0.00170554	0.00226805	0.300132	0.621537	0.0127871	0	0.321184	0.665132	0.013684
	CD03P3-18	61.136	0.003	24.384	0.128	0.006	0.014	5.974	7.458	0.37	0	99.473	2.72629	0.00010063	1.28155	0.00477355	0.000226627	0.000930705	0.285439	0.644829	0.0210492	0	0.300046	0.677827	0.0221264
	CD03P3-19	60.542	0	24.653	0.203	0	0.016	6.562	7.352	0.397	0	99.725	2.70127	0	1.29639	0.00757466	0	0.00106424	0.313704	0.636009	0.0225975	0	0.322638	0.654121	0.023241
	CD03P3-20	60.522	0	24.74	0.215	0	0.005	6.772	7.252	0.445	0	99.951	2.69679	0	1.29924	0.00801176	0	0.000332133	0.323313	0.626524	0.025296	0	0.331558	0.642501	0.0259411
	CD03P3-70	59.657	0.037	25.387	0.357	0	0	7.208	6.801	0.375	0	99.822	2.66468	0.00124313	1.33645	0.0133355	0	0	0.344963	0.588984	0.0213685	0	0.361098	0.616534	0.022368
	CD03P3-72	59.783	0	25.16	0.375	0.043	0.026	6.095	6.936	0.226	0.007	98.651	2.68928	0	1.3339	0.0141073	0.00163837	0.00174357	0.293768	0.604942	0.0129696	0.000248963	0.322228	0.663546	0.014226
	CD03P3-87	59.96	0	24.451	0.195	0	0.012	6.494	7.392	0.33	0.002	98.836	2.69993	0	1.29761	0.00734314	0	0.000805529	0.313312	0.645356	0.0189567	7.12033e-05	0.320483	0.660127	0.0193906
	CD03P3-88	60.519	0.013	24.664	0.032	0.022	0.001	6.163	7.462	0.246	0.002	99.124	2.70925	0.000437754	1.3013	0.00119802	0.00083419	6.67368e-05	0.295612	0.647677	0.0140492	7.0789e-05	0.308785	0.676539	0.0146752
	CD03P3-89	60.334	0	24.592	0.118	0.012	0	6.383	7.434	0.228	0.015	99.116	2.70463	0	1.29926	0.00442369	0.000455631	0	0.30658	0.646123	0.0130389	0.000531639	0.317456	0.669043	0.0135014
Symplectite-type	CD03P4-73	58.027	0	26.315	0.297	0.033	0	8.237	6.239	0.254	0	99.402	2.60961	0	1.39478	0.0111701	0.00125703	0	0.396905	0.544009	0.0145726	0	0.415396	0.569353	0.0152515
	CD03P4-74	58.062	0.021	26.58	0.293	0.067	0	8.284	6.335	0.27	0.081	99.993	2.59883	0.000707025	1.40216	0.0109676	0.00254007	0	0.397283	0.549768	0.0154173	0.00286649	0.412775	0.571207	0.0160185
	CD03P4-75	57.766	0	26.522	0.188	0	0	8.117	6.339	0.288	0	99.22	2.60204	0	1.408	0.00708199	0	0	0.391751	0.553616	0.0165498	0	0.407261	0.575534	0.017205
Inclusion-type	CD01P1-36	60.77	0	23.91	0.61	0.03	0	5.97	8.41	0	0	99.7	2.71758	0	1.26017	0.0228128	0.00113632	0	0.286049	0.729181	0	0	0.281758	0.718242	0
	CD01P1-37	60.49	0	23.75	0.63	0.01	0.01	6.33	7.86	0.53	0	99.61	2.71473	0	1.25621	0.023645	0.000380127	0.00066904	0.304383	0.683931	0.0303444	0	0.298808	0.671404	0.0297885
	CD01P1-38	60.59	0	23.85	0.64	0	0	6.38	7.72	0.41	0	99.59	2.71613	0	1.26007	0.023993	0	0	0.306438	0.670985	0.0234472	0	0.306172	0.670401	0.0234268
Matrix-type	CD01P-Line1-01	61.411	0.024	24.56	0.092	0.026	0.01	6.378	7.969	0.45	0	100.92	2.71044	0.000796773	1.27755	0.00339576	0.000971968	0.000657964	0.301614	0.681937	0.0253376	0	0.298957	0.675929	0.0251143
	CD01P-Line1-02	62.075	0.01	24.42	0.085	0	0	5.797	8.121	0.419	0.074	101.001	2.73003	0.000330812	1.26576	0.00312627	0	0	0.273167	0.69248	0.0235084	0	0.276162	0.700072	0.0237662
	CD01P-Line1-03	62.239	0.044	23.86	0.092	0	0.015	5.549	8.068	0.403	0	100.27	2.75247	0.00146367	1.24362	0.00340254	0	0.000988917	0.262935	0.691787	0.0227365	0	0.268998	0.707741	0.0232608
	CD01P-Line1-04	62.275	0.019	23.859	0.05	0	0	5.588	8.164	0.443	0	100.398	2.75273	0.000631732	1.24296	0.00184831	0	0	0.264655	0.69968	0.0249811	0	0.267513	0.707236	0.0252509
	CD01P-Line1-05	61.505	0	24.047	0.103	0	0.009	5.924	8.035	0.361	0.014	99.998	2.73309	0	1.25939	0.0038277	0	0.000596204	0.282054	0.692272	0.0204649	0	0.283531	0.695897	0.0205721
	CD01P-Line1-06	61.085	0.01	24.62	0.156	0	0	6.427	7.851	0.34	0	100.489	2.70555	0.000333159	1.28519	0.00577833	0	0	0.305002	0.674207	0.0192114	0	0.305485	0.675273	0.0192418
Matrix-type	CD46P2-19	63.397	0.024	23.261	0.083	0	0	4.342	8.867	0.241	0.056	100.271	2.79451	0.000795753	1.20843	0.00305965	0	0	0.205069	0.75781	0.0135523	0.00195166	0.210019	0.776102	0.0138794
	CD46P2-20	63.579	0.024	23.239	0.074	0.033	0	4.576	8.892	0.196	0	100.613	2.79445	0.000793456	1.2038	0.00272	0.00122852	0	0.215497	0.757753	0.01099	0	0.218948	0.769887	0.0111659
	CD46P2-21	63.396	0.005	23.19	0.045	0	0	4.466	8.688	0.285	0.05	100.125	2.79658	0.000165907	1.20565	0.0016601	0	0	0.211085	0.743072	0.0160387	0.00174387	0.217569	0.765899	0.0165314
	CD46P2-22	63.23	0	23.327	0.129	0	0	4.365	8.919	0.271	0.025	100.266	2.78912	0	1.21271	0.00475871	0	0	0.206301	0.762792	0.0152501	0.000871892	0.209582	0.774925	0.0154926
	CD46P2-23	63.373	0	23.298	0.165	0.009	0.012	4.492	9.062	0.212	0.019	100.642	2.78694	0	1.20753	0.00606826	0.000335237	0.000786708	0.211659	0.772671	0.0118937	0.000660627	0.212461	0.7756	0.0119388
Matrix-type	CD32P1-Line-01	60.052	0.043	25.661	0.294	0.038	0	7.057	7.342	0.395	0.003	100.885	2.65743	0.0014313	1.33833	0.0108802	0.0014243	0	0.334601	0.629934	0.0222992	0.000104963	0.339065	0.638338	0.0225967
	CD32P1-Line-02	61.119	0	25.247	0.21	0	0	6.444	7.669	0.519	0.014	101.222	2.69023	0	1.30972	0.00773016	0	0	0.303908	0.654483	0.0291433	0.000487214	0.307744	0.662745	0.0295112
	CD32P1-Line-03	61.739	0	24.617	0.1	0.007	0.01	6.164	7.597	0.56	0	100.794	2.72187	0	1.27908	0.00368692	0.000261391	0.000657229	0.291168	0.649377	0.0314959	0	0.299543	0.668055	0.0324019
	CD32P1-Line-04	61.29	0.019	24.764	0.065	0	0	6.005	7.661	0.628	0	100.432	2.71158	0.00063229	1.29125	0.00240493	0	0	0.284655	0.657151	0.0354447	0	0.291282	0.672448	0.0362698
	CD32P1-Line-05	60.862	0	24.391	0.133	0.023	0	5.94	7.574	0.608	0	99.531	2.71904	0	1.28427	0.00496909	0.000870326	0	0.284334	0.656056	0.0346522	0	0.291612	0.672849	0.0355392
	CD32P1-Line-06	60.125	0	25.096	0.196	0.009	0	6.584	7.266	0.45	0	99.726	2.6845	0	1.32059	0.00731846	0.000340357	0	0.314971	0.628998	0.0256318	0	0.324846	0.648719	0.0264354
K-feldspar	Point	SiO2	TiO2	Al2O3	FeOT	MnO	MgO	CaO	Na2O	K2O	Cr2O3	Sum	Si	Ti	Al	Fe3+	Mn	Mg	Ca	Na	K	Cr	An	Ab	Or
Matrix-type	CD03K2-Line1-01	64.151	0.095	18.709	0.12	0.002	0	0.074	0.952	15.637	0	99.74	2.97342	0.00331212	1.02202	0.00465148	7.85179e-05	0	0.00367501	0.0855533	0.924625	0	0.00362479	0.0843843	0.911991
	CD03K2-Line1-02	64.311	0.175	18.68	0.044	0.006	0	0.072	1.077	15.572	0.005	99.942	2.97374	0.00608674	1.01801	0.00170148	0.000234992	0	0.00356716	0.096556	0.918586	0.000182796	0.00350165	0.0947826	0.901716
	CD03K2-Line1-03	64.229	0.061	18.555	0.006	0	0	0.07	1.129	15.241	0.022	99.313	2.98263	0.00213073	1.01551	0.000233011	0	0	0.00348289	0.10165	0.902902	0.000807737	0.00345513	0.10084	0.895705
	CD03K2-Line1-04	63.844	0	18.941	0.036	0.02	0	0.093	0.871	15.606	0	99.411	2.96744	0	1.03758	0.00139933	0.000787367	0	0.00463146	0.0784923	0.925364	0	0.00459249	0.0778317	0.917576
	CD03K2-Line1-05	64.452	0.077	18.885	0.04	0.01	0	0.065	1.003	15.547	0	100.079	2.97345	0.00267205	1.02683	0.00154326	0.000390759	0	0.003213	0.0897164	0.915018	0	0.00318767	0.089009	0.907803
	CD03K2-Line1-06	63.65	0.127	18.235	0.046	0.044	0	0.067	0.751	15.79	0	98.71	2.98344	0.00447767	1.00735	0.00180315	0.00174686	0	0.00336486	0.0682504	0.944191	0	0.0033125	0.0671885	0.929499
	CD03K2-Line1-07	64.068	0.048	18.929	0.072	0.04	0	0.065	0.813	16.065	0.015	100.115	2.96458	0.00167068	1.0323	0.00278619	0.00156772	0	0.00322262	0.072939	0.948335	0.000548773	0.00314556	0.0711949	0.92566
	CD03K2-Line1-08	63.644	0.045	18.688	0.118	0	0	0.077	0.991	15.976	0.01	99.549	2.96471	0.00157676	1.02599	0.00459687	0	0	0.00384316	0.0895044	0.949404	0.000368301	0.00368559	0.0858349	0.91048
	CD03K2-Line1-09	64.142	0.124	18.625	0.014	0.038	0	0.082	0.834	15.616	0	99.475	2.97819	0.00433073	1.01921	0.000543618	0.00149444	0	0.0040794	0.0750796	0.924992	0	0.00406254	0.0747693	0.921168
	CD03K2-Line1-10	63.749	0.082	18.712	0.006	0.02	0	0.032	1.194	15.405	0.025	99.225	2.96902	0.00287265	1.02711	0.000233694	0.00078896	0	0.00159684	0.107818	0.915292	0.000920573	0.00155834	0.105218	0.893224
	CD03-4K3-11	64.572	0	17.754	0.34	0.011	0	0.021	0.365	15.861	0	98.924	3.01493	0	0.976978	0.013276	0.000435021	0	0.00105057	0.0330424	0.944761	0	0.00107327	0.0337563	0.96517
	CD03-4K3-12	64.168	0.043	18.34	0.375	0.002	0.001	0.287	0.771	14.892	0	98.879	2.98988	0.00150707	1.00714	0.0146124	7.89314e-05	6.94614e-05	0.0143281	0.0696523	0.88521	0	0.0147836	0.0718665	0.91335
Matrix-type	CD01K2-Line1-01	64.93	0.04	17.56	0.07	0	0	0.03	0.81	16.1	0	99.54	3.01808	0.00139854	0.96198	0.00272107	0	0	0.0014941	0.072999	0.954707	0	0.00145171	0.0709279	0.92762
	CD01K2-Line1-02	65.1	0.03	17.57	0.04	0	0	0.05	0.93	16.11	0	99.83	3.01789	0.0010461	0.959953	0.00155074	0	0	0.00248351	0.0835895	0.952744	0	0.00239071	0.080466	0.917143
	CD01K2-Line1-03	65.37	0.07	17.66	0.02	0	0	0.06	1	15.98	0	100.16	3.0175	0.0024305	0.960761	0.000772066	0	0	0.00296751	0.0894983	0.94103	0	0.00287133	0.0865976	0.910531
	CD01K2-Line1-04	65.36	0	17.53	0.02	0.02	0	0.04	0.95	16	0	99.92	3.02393	0	0.955869	0.000773831	0.000783746	0	0.00198287	0.0852178	0.944362	0	0.0019222	0.0826103	0.915467
	CD01K2-Line1-05	65.44	0	17.64	0.04	0	0	0.05	1.08	15.75	0	100	3.02184	0	0.960026	0.0015447	0	0	0.00247384	0.0966938	0.927828	0	0.00240881	0.0941521	0.903439
	CD01K2-Line1-06	65.03	0.01	17.53	0.13	0.04	0	0.06	1.04	15.96	0	99.8	3.01657	0.000348922	0.958378	0.00504311	0.00157161	0	0.00298211	0.093536	0.944475	0	0.00286468	0.0898527	0.907283
	CD01K3-27	65.4	0.02	17.39	0.03	0	0	0.05	0.94	16.11	0	99.94	3.02709	0.000696318	0.948645	0.00116125	0	0	0.00247965	0.0843572	0.951266	0	0.00238864	0.0812609	0.91635
	CD01K3-28	65.06	0.04	17.52	0	0	0	0.03	0.88	16.18	0	99.71	3.01974	0.00139652	0.958399	0	0	0	0.00149194	0.0791927	0.958061	0	0.00143629	0.0762388	0.922325
	CD01K3-29	65.56	0.05	17.45	0.02	0	0	0.04	0.9	16.04	0	100.06	3.02804	0.00173709	0.949892	0.000772518	0	0	0.0019795	0.0805956	0.945117	0	0.00192616	0.0784239	0.91965
	CD01K3-30	64.74	0.01	17.58	0.02	0.02	0	0.05	0.95	16.16	0	99.53	3.01309	0.000350081	0.964304	0.00077844	0.000788414	0	0.00249334	0.0857253	0.959487	0	0.00237981	0.081822	0.915798
	CD01K3-31	65.05	0	17.62	0.05	0	0	0.06	0.83	16.28	0	99.89	3.01603	0	0.962831	0.00193872	0	0	0.00298066	0.0746127	0.962944	0	0.00286454	0.0717059	0.92543
	CD01K3-32	64.72	0	17.61	0.03	0.02	0	0.08	1.18	15.84	0	99.48	3.01115	0	0.965628	0.00116727	0.000788151	0	0.00398802	0.106444	0.940174	0	0.00379592	0.101317	0.894887
Matrix-type	CD46K2-29	65.02	0.01	17.46	1.71	0	0.34	0.16	1.25	13.84	0	99.79	3.00549	0.000347694	0.951193	0.0661029	0	0.0234291	0.00792431	0.112027	0.816136	0	0.00846534	0.119676	0.871858
	CD46K2-30	65.34	0	18.12	0.03	0.02	0	0.07	1.65	14.72	0	99.95	3.00726	0	0.982892	0.0011547	0.000779662	0	0.00345193	0.147239	0.864287	0	0.003401	0.145066	0.851533
	CD46K2-31	65.3	0.02	18.2	0.04	0.01	0	0.09	1.8	14.7	0	100.16	3.00118	0.000691414	0.985839	0.00153743	0.000389281	0	0.00443194	0.160397	0.861895	0	0.00431658	0.156222	0.839461
	CD46K2-32	65.49	0	18.08	0.04	0	0	0.07	1.82	14.7	0	100.2	3.00771	0	0.978623	0.0015363	0	0	0.00344455	0.162061	0.861265	0	0.00335474	0.157836	0.83881
	CD46K2-33	65.09	0	18.08	0.02	0	0	0.07	1.5	15.17	0	99.93	3.0036	0	0.983292	0.000771817	0	0	0.00346098	0.134204	0.893043	0	0.00335787	0.130206	0.866436
	CD46K2-34	65.49	0	17.97	0.04	0	0	0.07	1.81	14.79	0	100.17	3.01025	0	0.973489	0.0015376	0	0	0.00344745	0.161307	0.867269	0	0.00334048	0.156301	0.840358
	CD46K2-35	65.32	0.06	17.94	0.06	0	0	0.06	1.4	15.21	0	100.05	3.00981	0.00207957	0.974251	0.00231206	0	0	0.00296221	0.125074	0.894087	0	0.0028981	0.122367	0.874735
	CD46K2-36	65.27	0.02	17.77	0.15	0.01	0.06	0.07	1.43	15.24	0	100.02	3.01147	0.000694103	0.966291	0.00578777	0.000390795	0.0041269	0.00346047	0.127922	0.897032	0	0.00336486	0.124388	0.872247
	CD46K2-37	65.47	0.02	17.94	0.05	0.02	0	0.06	1.69	15.17	0	100.42	3.00798	0.000691182	0.971431	0.00192114	0.000778302	0	0.00295364	0.150545	0.889155	0	0.00283281	0.144386	0.852781
	CD46K2-25	65.23	0.05	18.29	0.06	0.01	0	0.07	1.8	13.8	0	99.31	3.00685	0.00173366	0.993651	0.00231298	0.000390435	0	0.00345729	0.160873	0.811525	0	0.00354283	0.164853	0.831604
Matrix-type	CD32K2-16	65.16	0	17.9	0.06	0	0	0.03	0.73	15.75	0	99.63	3.01665	0	0.976681	0.00232301	0	0	0.00148812	0.0655259	0.930214	0	0.00149226	0.0657081	0.9328
	CD32K2-17	64.55	0.03	17.79	0.03	0	0	0.02	0.57	16.46	0	99.45	3.00768	0.00105144	0.97694	0.001169	0	0	0.000998479	0.051494	0.978417	0	0.000968541	0.0499501	0.949081
	CD32K2-18	64.95	0.01	17.77	0.05	0.02	0	0.03	0.66	16.48	0	99.97	3.01091	0.000348697	0.970871	0.0019384	0.000785296	0	0.00149009	0.059321	0.974617	0	0.00143911	0.0572913	0.94127
Biotite	Point	SiO2	TiO2	Al2O3	FeOT	MnO	MgO	CaO	Na2O	K2O	Cr2O3	Sum	Si	Ti	Al	Fe2+	Fe3+	Mn	Mg	Ca	Na	K	Cr
	CD03B4-27	35.426	3.891	14.94	19.324	0.093	11.962	0.007	0.039	9.223	0.083	94.988	2.714	0.224	1.349	1.175	0.062	0.006	1.365	0.001	0.006	0.901	0.01
	CD03B4-28	36.543	3.503	14.454	17.787	0.146	13.069	0	0.046	9.705	0.099	95.352	2.777	0.2	1.295	1.131	0	0.01	1.48	0	0.007	0.941	0.006
	CD03B4-29	36.485	3.667	14.882	17.606	0.18	13.195	0.02	0.07	9.277	0.089	95.471	2.754	0.208	1.324	1.073	0.038	0.012	1.485	0.002	0.01	0.894	0.005
	CD01B3-19	35.683	4.756	13.766	18.886	0.089	11.611	0	0.039	9.743	0.123	94.696	2.755	0.276	1.254	1.22	0	0.006	1.336	0	0.006	0.96	0.007
	CD01B3-20	36.27	4.788	14.229	18.15	0.023	11.489	0	0.044	9.601	0.176	94.77	2.778	0.276	1.285	1.163	0	0.001	1.312	0	0.006	0.938	0.011
	CD01B3-21	35.853	5.185	13.97	18.685	0.009	11.601	0.002	0.026	9.831	0.037	95.199	2.748	0.299	1.263	1.198	0	0.001	1.325	0	0.004	0.961	0.002
	CD32B2-24	36.132	5.881	13.914	17.47	0.077	12.444	0.114	0.079	9.537	0.012	95.66	2.737	0.335	1.242	1.107	0	0.005	1.404	0.009	0.012	0.922	0.001
	CD32B2-25	35.557	5.98	14.222	17.133	0.069	12.872	0.083	0.081	9.18	0.048	95.225	2.699	0.341	1.273	1.088	0	0.005	1.456	0.007	0.012	0.889	0.003
	CD32B2-27	34.234	5.745	14.406	19.387	0.114	12.134	0.025	0.076	9.268	0.027	95.416	2.626	0.332	1.303	1.188	0.056	0.007	1.387	0.002	0.012	0.907	0.002
Note:
(a): Cations of garnet are calculated based on 12-oxygen basis. Ferric iron contents of garnet are determined according to the method of Droop (1987). (b): Cations of pyroxenes are calculated based on 6-oxygen basis. Ferric iron contents of
garnet are determined according to the method of Droop (1987). (c): Cations of hornblende are calculated based on 23-oxygen basis. Ferric iron contents of hornblende were determined according to the method of Holland and Blundy (1994).
(d): Cations of biotite are calculated based on 8-oxygen basis. (e): Cations of plagioclase and K-feldspar are calculated based on 8-oxygen basis. (f): Cations of magnetite are calculated based on 4-oxygen basis. (g): Cations of ilmenite are
calulated based on 3-oxygen basis.
Xalm = Fe2+/(Fe2++Mg+Mn+Ca).
Xprp = Mg/(Fe2++Mg+Mn+Ca).
Xgrs= Ca/(Fe2++Mg+Mn+Ca).
Xsps = Mn/(Fe2++Mg+Mn+Ca).
Mg# = Mg/(Fe2++Mg).
XAn = Ca/(Ca+Na+K).
XAb = Na/ (Ca+Na+K).
XOr = K/(Ca+Na+K).
Droop, G.T.R., 1987. A general equation for estimating Fe3+ concentrations in ferromagnesian silicates and oxides from microprobe analyses, using stoichiometric criteria. Miner. Mag. 25, 431–435.
Holland, T.J.B. and Blundy, J.D., 1994. Non-ideal interactions in calcic amphiboles and their bearing on amphibole-plagioclase thermometry. Contrib. Miner. Petrol. 116, 433–447.

## Sheet: Table S2
Table S2. LA–ICP–MS U-Pb analytical results of the zircons of mafic granulites and amphibolites from the Chengde Complex.
	Sample	TotalPb	232Th	238U	Th/U		207Pb/206Pb		207Pb/235U		206Pb/238U		208Pb/232Th			207Pb/206Pb		207Pb/235U		206Pb/238U		208Pb/232Th
							Ratio	1s	Ratio	1s	Ratio	1s	Ratio	1s		Age (Ma)	1s	Age (Ma)	1s	Age (Ma)	1s	Age (Ma)	1s
Group 1	CD03-06	11.9133	1.77245	31.3433	0.0565494		0.113069	0.0036753	5.31969	0.174127	0.341198	0.00485255	0.132713	0.00985843		1850.01	58.18	1872.03	28.0058	1892.43	23.346	2518.76	175.915
	CD03-07	13.029	5.25908	33.7059	0.156029		0.116268	0.00485233	5.44806	0.243952	0.34118	0.00862317	0.126352	0.0116916		1899.69	69.5975	1892.45	38.4369	1892.34	41.4601	2404.93	209.804
	CD03-10	14.4181	1.14219	38.4556	0.0297016		0.120894	0.00366887	5.64344	0.176512	0.338222	0.00552459	0.123152	0.00905019		1969.44	59.415	1922.76	27.0097	1878.11	26.6321	2347.43	162.867
	CD03-11	26.3595	2.50174	70.7954	0.0353377		0.116954	0.00301163	5.29571	0.13911	0.325521	0.00384739	0.100461	0.00546765		1910.18	50.925	1868.17	22.4719	1816.63	18.7367	1934.89	100.425
	CD03-12	12.4574	5.72163	31.0142	0.184484		0.119597	0.00465664	5.7296	0.23076	0.346862	0.00611827	0.107676	0.0067347		1950.31	69.29	1935.84	34.8426	1919.6	29.3019	2066.98	122.891
	CD03-16	11.4129	2.10105	30.4695	0.0689558		0.121813	0.0048654	5.50411	0.208939	0.331029	0.00543144	0.0947467	0.00734169		1983.03	71.7575	1901.24	32.6439	1843.37	26.3243	1829.67	135.549
	CD03-17	20.0423	3.64895	53.0908	0.0687303		0.116966	0.00327973	5.30714	0.150739	0.325665	0.00418628	0.104902	0.00630903		1910.18	51.0825	1870.01	24.3007	1817.34	20.3806	2016.31	115.413
	CD03-20	16.1305	2.89236	43.1212	0.0670751		0.118264	0.00375989	5.45032	0.1731	0.332245	0.00505575	0.112591	0.00833426		1931.49	57.5625	1892.81	27.279	1849.25	24.4839	2156.48	151.407
	CD03-21	14.8412	5.35749	37.1603	0.144172		0.117636	0.00447111	5.4955	0.204503	0.340532	0.00600457	0.11812	0.00954476		1920.68	68.21	1899.89	31.9942	1889.23	28.8931	2256.68	172.54
	CD03-26	18.3526	5.92503	40.7804	0.145291		0.123009	0.00432196	5.95037	0.226873	0.345381	0.00577923	0.276398	0.0207553		2066.66	62.34	1968.62	33.171	1912.5	27.7105	4932.63	328.667
	CD03-29	29.5848	8.57139	68.2253	0.125634		0.113122	0.00288709	5.81103	0.172929	0.368063	0.00740491	0.144541	0.00884879		1850.31	45.99	1948.06	25.8141	2020.28	34.9096	2728.72	156.267
	CD03-30	14.5561	4.67113	37.5175	0.124505		0.116915	0.00430645	5.24164	0.185223	0.322879	0.00470988	0.0940517	0.0103205		1909.57	66.6675	1859.41	30.1584	1803.77	22.972	1816.84	190.667
	CD03-32	10.4595	3.28011	27.8397	0.117821		0.113424	0.00450606	5.22287	0.200994	0.33607	0.00618989	0.112943	0.00664498		1855.25	71.915	1856.36	32.8204	1867.73	29.8827	2162.86	120.68
	CD03-37	15.9044	7.05569	42.436	0.166266		0.112409	0.00493292	4.85501	0.190855	0.319959	0.00589453	0.106568	0.00770531		1838.58	75	1794.48	33.1209	1789.53	28.8039	2046.76	140.743
	CD03-38	13.5718	3.05758	34.6343	0.0882817		0.116676	0.00378737	5.67428	0.197024	0.349423	0.00509769	0.10577	0.00775877		1905.87	59.105	1927.46	30.0027	1931.84	24.3748	2032.18	141.821
	CD03-39	20.0613	8.87424	56.2183	0.157853		0.117028	0.00428517	4.91407	0.181508	0.302369	0.0051227	0.0796842	0.00449146		1922.22	65.74	1804.68	31.1871	1703.05	25.3728	1549.64	84.0824
Group 2	CD03-02	28.4614	6.92278	75.3546	0.0918693		0.112764	0.0032104	5.19985	0.161353	0.33205	0.00567709	0.13205	0.00608087		1844.14	51.545	1852.59	26.4556	1848.31	27.4922	2506.93	108.571
	CD03-05	39.2667	1.60213	107.123	0.014956		0.115299	0.00278733	5.35094	0.128522	0.334786	0.00379673	0.131578	0.0125844		1884.26	43.5225	1877.04	20.5877	1861.54	18.364	2498.5	224.783
	CD03-09	42.0761	3.44961	123.908	0.02784		0.116807	0.00322373	4.90928	0.125564	0.304636	0.00395724	0.119169	0.00770815		1909.26	54.475	1803.85	21.6103	1714.26	19.5752	2275.63	139.209
	CD03-13	27.1009	23.7316	61.6066	0.385212		0.113693	0.00313472	5.31995	0.146204	0.337236	0.00430174	0.0946218	0.00245008		1861.12	50	1872.07	23.524	1873.36	20.762	1827.37	45.2409
	CD03-18	60.333	6.97811	156.836	0.044493		0.111117	0.00256386	5.16625	0.125221	0.332648	0.00418475	0.12576	0.00644722		1817.59	41.51	1847.07	20.658	1851.2	20.2676	2394.31	115.755
	CD03-19	36.6782	4.08973	98.0178	0.0417243		0.113336	0.00270428	5.22357	0.12464	0.331083	0.00392742	0.110542	0.00595252		1853.4	43.21	1856.47	20.3743	1843.63	19.0465	2119.21	108.338
	CD03-33	40.7204	7.16505	113.249	0.063268		0.108795	0.00331559	4.86169	0.140267	0.322805	0.00459766	0.0983965	0.00559705		1788.89	55.56	1795.64	24.3282	1803.41	22.4269	1896.95	102.995
	CD03-36	26.1525	5.89595	71.9905	0.0818989		0.119903	0.00440001	5.47334	0.210202	0.329375	0.00546702	0.125762	0.00855168		1954.63	66.2025	1896.42	32.9966	1835.35	26.5292	2394.34	153.539
	CD03-40	19.7229	3.32907	55.5909	0.0598851		0.11615	0.00369554	5.16961	0.165123	0.321736	0.00424353	0.0923369	0.00677664		1898.15	57.41	1847.63	27.2048	1798.2	20.7194	1785.13	125.393
Group 3	CD03-01	102.374	146.897	215.026	0.683162		0.110892	0.00253347	4.95954	0.118042	0.321502	0.00386517	0.0936796	0.00214508		1813.88	41.5125	1812.45	20.1496	1797.06	18.8796	1809.96	39.6431
	CD03-03	320.083	258.569	769.986	0.33581		0.109841	0.00251931	4.90086	0.121742	0.320489	0.00433811	0.094063	0.00256947		1798.15	42.1325	1802.41	20.9844	1792.12	21.2	1817.04	47.4696
	CD03-04	143.415	86.6083	368.989	0.234718		0.109749	0.00250748	4.88232	0.114514	0.320921	0.00437875	0.0888983	0.0023384		1795.37	41.2075	1799.21	19.8048	1794.22	21.3913	1721.4	43.4057
	CD03-08	102.673	145.53	221.675	0.6565		0.11426	0.00291419	5.09131	0.134586	0.320595	0.00405761	0.09144	0.00234077		1933.34	45.9875	1834.66	22.4693	1792.64	19.8306	1768.53	43.3484
	CD03-14	83.1465	118.516	181.465	0.653109		0.11077	0.0024988	4.92825	0.118855	0.318758	0.00446617	0.089412	0.00216973		1812.96	40.7425	1807.11	20.3944	1783.66	21.853	1730.94	40.2557
	CD03-15	127.879	138.374	290.802	0.475835		0.110848	0.00238969	4.90744	0.105103	0.317993	0.00378924	0.093993	0.00192051		1813.27	39.97	1803.54	18.1068	1779.92	18.5584	1815.75	35.4826
	CD03-22	90.9909	107.858	201.385	0.535582		0.115996	0.00279964	5.24996	0.127517	0.324476	0.00375282	0.0950178	0.0023252		1895.37	43.6725	1860.76	20.7554	1811.55	18.2917	1834.68	42.9193
	CD03-23	222.295	255.987	498.154	0.513871		0.111497	0.00261046	4.94492	0.119056	0.317127	0.00388433	0.0862017	0.00201949		1823.76	42.2875	1809.96	20.3718	1775.69	19.0352	1671.29	37.5789
	CD03-24	392.76	342.554	919.364	0.372599		0.114402	0.00271172	4.95034	0.116205	0.309863	0.00370223	0.0853955	0.00209815		1872.22	47.225	1810.88	19.8677	1740.03	18.2445	1656.28	39.0717
	CD03-25	56.5059	100.059	124.019	0.806804		0.11574	0.00320764	4.94972	0.168415	0.304908	0.00574637	0.0806787	0.0023108		1891.66	50.005	1810.78	28.7682	1715.6	28.4029	1568.25	43.2196
	CD03-27	134.683	152.351	295.31	0.515901		0.110496	0.00302859	4.88391	0.127526	0.316714	0.0038665	0.0974192	0.0025304		1809.26	45.3725	1799.48	22.041	1773.66	18.9539	1878.95	46.6048
	CD03-28	88.9029	149.046	182.499	0.816694		0.110951	0.00246245	4.96648	0.109302	0.320044	0.00367386	0.0867104	0.00198458		1816.66	39.3525	1813.63	18.6421	1789.94	17.9673	1680.75	36.9121
	CD03-31	117.98	167.888	259.125	0.647903		0.109872	0.00272119	4.95493	0.120814	0.32248	0.00422762	0.0874698	0.00215426		1798.15	45.5275	1811.67	20.6369	1801.83	20.6305	1694.87	40.0401
	CD03-34	156.868	170.726	365.461	0.467152		0.109868	0.00234632	5.00963	0.11333	0.326214	0.00425162	0.0903317	0.00223336		1798.15	38.895	1820.95	19.1882	1820.01	20.6895	1747.99	41.4014
	CD03-35	96.1148	78.5643	245.13	0.3205		0.111788	0.00255898	4.76648	0.106068	0.30609	0.00326026	0.0843933	0.00206082		1828.7	41.2025	1779.01	18.716	1721.44	16.1184	1637.61	38.412
	Sample	TotalPb	232Th	238U	Th/U		207Pb/206Pb		207Pb/235U		206Pb/238U		208Pb/232Th			207Pb/206Pb		207Pb/235U		206Pb/238U		208Pb/232Th
							Ratio	1s	Ratio	1s	Ratio	1s	Ratio	1s		Age (Ma)	1s	Age (Ma)	1s	Age (Ma)	1s	Age (Ma)	1s
Group 1	CD01-04	54.5521	7.07396	134.051	0.0527708		0.114286	0.00271556	5.2854	0.137881	0.333825	0.00637558	0.129018	0.0102614		1868.83	42.9025	1866.51	22.3102	1856.89	30.8297	2452.71	183.705
	CD01-07	61.3318	8.50957	151.993	0.0559866		0.11333	0.00300572	5.16805	0.132509	0.331559	0.0040634	0.117308	0.00502199		1853.4	48.1475	1847.37	21.8497	1845.93	19.6972	2241.98	90.8484
	CD01-09	57.039	7.70817	137.884	0.0559031		0.114119	0.00342324	5.20256	0.156539	0.331727	0.00472367	0.185333	0.0124347		1865.74	54.785	1853.04	25.6569	1846.75	22.8873	3436.56	212.036
	CD01-12	51.719	7.83355	129.733	0.0603819		0.11303	0.00278597	5.15148	0.157389	0.332112	0.00812812	0.114795	0.00816071		1850.01	45.5275	1844.64	26.0093	1848.61	39.3466	2196.47	147.961
	CD01-13	68.6158	14.8845	153.771	0.0967962		0.114054	0.00313903	5.5503	0.156786	0.353213	0.00445821	0.130646	0.00506886		1865.13	49.6925	1908.42	24.3385	1949.92	21.264	2481.84	90.6145
	CD01-19	54.0109	8.81347	127.736	0.0689978		0.115124	0.0028147	5.57659	0.14325	0.349205	0.00464518	0.12852	0.0046807		1883.34	43.055	1912.49	22.155	1930.8	22.2189	2443.79	83.8332
	CD01-23	54.2062	15.1783	135.991	0.111613		0.114969	0.00448478	5.35205	0.214579	0.335779	0.00599866	0.119207	0.00550705		1879.32	70.37	1877.22	34.3245	1866.33	28.9668	2276.32	99.4542
	CD01-28	47.9547	15.8206	118.933	0.133021		0.114247	0.00323004	5.37911	0.171928	0.337483	0.00471756	0.102781	0.00440515		1933.34	50.7725	1881.53	27.3962	1874.55	22.7603	1977.46	80.7395
	CD01-30	59.8393	5.5195	149.245	0.0369828		0.113779	0.00264908	5.3887	0.129331	0.340347	0.00442104	0.125923	0.00660388		1861.12	41.975	1883.06	20.5949	1888.34	21.2875	2397.23	118.551
	CD01-31	53.5408	13.6814	134.298	0.101874		0.114034	0.00260569	5.19589	0.127486	0.326525	0.0043199	0.109574	0.00397222		1864.51	35.9575	1851.94	20.9304	1821.52	21.0161	2101.59	72.3588
	CD01-40	52.224	7.33726	126.039	0.0582141		0.114736	0.002853	5.46016	0.159491	0.341661	0.00621481	0.111993	0.00531173		1875.62	44.4425	1894.35	25.1012	1894.65	29.8784	2145.6	96.5491
	CD01-08	50.5211	2.87763	123.571	0.0232873		0.110104	0.00263315	5.14451	0.124917	0.339331	0.0039121	0.120839	0.00724008		1811.11	38.7375	1843.49	20.6807	1883.45	18.857	2305.76	130.561
	CD01-32	50.3538	4.93941	124.438	0.0396936		0.112451	0.00272187	5.26705	0.127713	0.335883	0.00371438	0.108797	0.00576053		1839.2	44.2925	1863.54	20.7307	1866.83	17.9524	2087.43	105.009
Group 2	CD01-01	214.298	151.894	506.634	0.299809		0.111532	0.00214576	4.94703	0.106639	0.318623	0.00428672	0.0944302	0.00207003		1824.38	34.105	1810.32	18.2489	1783	20.9788	1823.83	38.2298
	CD01-02	240.586	239.154	533.44	0.448323		0.111015	0.00216562	5.11308	0.107364	0.331391	0.00420431	0.0950257	0.00199839		1816.66	35.495	1838.28	17.8768	1845.12	20.3811	1834.82	36.8866
	CD01-03	178.723	131.312	418.178	0.314009		0.110543	0.0025801	5.01051	0.121856	0.326091	0.00376753	0.0953508	0.00294592		1809.26	42.595	1821.1	20.623	1819.41	18.3411	1840.82	54.3603
	CD01-05	181.946	148.415	419.639	0.353674		0.112216	0.00244306	4.96521	0.117518	0.31871	0.00419807	0.0908466	0.00213661		1835.5	40.28	1813.42	20.0416	1783.43	20.5445	1757.54	39.5892
	CD01-06	258.048	156.785	615.063	0.254908		0.110144	0.00246545	4.87422	0.109034	0.320228	0.00317745	0.0977267	0.00217688		1801.54	40.7425	1797.81	18.8866	1790.84	15.545	1884.62	40.0825
	CD01-10	178.948	118.998	397.48	0.299382		0.110126	0.00249371	5.41769	0.131951	0.357274	0.00464517	0.104874	0.00272555		1811.11	40.7425	1887.66	20.9162	1969.24	22.088	2015.8	49.8604
	CD01-11	199.223	103.394	471.596	0.219242		0.110865	0.00292741	5.05061	0.144	0.330244	0.0046213	0.101689	0.00333447		1813.88	47.9975	1827.85	24.1973	1839.57	22.417	1957.45	61.1762
	CD01-14	276.816	213.27	637.876	0.334344		0.111617	0.00217636	4.99694	0.106731	0.32467	0.00426634	0.0987425	0.00228754		1825.61	35.035	1818.8	18.1136	1812.5	20.7849	1903.31	42.081
	CD01-15	184.94	123.044	407.494	0.301953		0.111205	0.00392504	5.25705	0.182695	0.343016	0.00506019	0.102202	0.0032787		1820.37	64.6625	1861.92	29.6745	1901.16	24.3104	1966.85	60.125
	CD01-16	162.916	125.705	384.231	0.32716		0.11193	0.00374486	5.07323	0.171882	0.329096	0.0051624	0.105796	0.00383429		1831.49	65.5875	1831.64	28.764	1834	25.0584	2032.66	70.0849
	CD01-17	237.068	211.975	553.202	0.383178		0.111025	0.00240306	4.98441	0.112261	0.324158	0.00385074	0.0943933	0.00216025		1816.66	39.505	1816.68	19.0875	1810	18.7721	1823.15	39.8974
	CD01-18	205.957	201.156	499.489	0.402723		0.110752	0.00293459	4.70005	0.135837	0.306461	0.00478921	0.0896759	0.00367311		1812.96	48.15	1767.25	24.2272	1723.27	23.6495	1735.83	68.1319
	CD01-20	172.413	132.211	414.623	0.318871		0.111334	0.00434625	4.95302	0.171281	0.323665	0.00576987	0.0958619	0.00452957		1821.3	70.2175	1811.34	29.2407	1807.6	28.117	1850.25	83.544
	CD01-22	196.869	129.51	446.053	0.290346		0.111245	0.00235946	5.35914	0.120985	0.346924	0.00454232	0.0927833	0.00234184		1820.37	38.5825	1878.35	19.3603	1919.89	21.7644	1793.39	43.3148
	CD01-24	252.708	165.951	612.982	0.270727		0.110497	0.00268387	4.96203	0.134107	0.322263	0.00472354	0.0929718	0.00251859		1809.26	44.14	1812.88	22.8728	1800.77	23.0491	1796.88	46.5761
	CD01-25	190.635	147.031	484.145	0.303693		0.110143	0.0028424	4.87888	0.124088	0.319441	0.00451095	0.0856031	0.00254464		1801.54	46.915	1798.62	21.467	1787	22.0603	1660.15	47.3771
	CD01-26	179.277	93.5426	440.494	0.212359		0.110498	0.00265954	5.01488	0.124026	0.326164	0.00428787	0.10259	0.00309794		1809.26	43.06	1821.84	20.9736	1819.76	20.8663	1973.96	56.7901
	CD01-27	198.785	144.843	424.098	0.341533		0.109288	0.00304086	5.22758	0.163668	0.34329	0.0063042	0.109259	0.0040069		1787.35	51.3925	1857.12	26.7153	1902.48	30.2711	2095.85	73.0113
	CD01-33	175.727	129.551	418.946	0.30923		0.109706	0.0029004	4.80157	0.12835	0.313876	0.00448355	0.0910078	0.00258085		1794.75	48.1525	1785.17	22.4964	1759.75	22.0186	1760.52	47.8133
	CD01-34	170.603	129.23	400.018	0.323061		0.111044	0.0030821	5.07765	0.149283	0.330329	0.00636259	0.103454	0.00502109		1816.36	50.62	1832.38	24.9716	1839.98	30.8474	1989.8	91.9725
	CD01-36	208.717	122.848	509.514	0.241109		0.112274	0.00231676	4.89912	0.102144	0.312919	0.00315089	0.0860096	0.00195361		1836.73	37.345	1802.1	17.6241	1755.05	15.4999	1667.71	36.3596
	CD01-41	168.58	94.3939	419.961	0.224768		0.111512	0.00290048	4.92503	0.134391	0.317066	0.00388312	0.0931648	0.00268457		1824.38	47.9925	1806.56	23.0636	1775.38	19.0302	1800.45	49.6367
Group 3	CD01-21	103.78	33.3892	239.328	0.139512		0.113524	0.00249781	5.63833	0.137757	0.357928	0.00563574	0.122009	0.0036217		1857.41	39.6625	1921.98	21.1114	1972.34	26.7754	2326.84	65.2425
	CD01-29	134.163	67.189	299.516	0.224326		0.11331	0.00228603	5.58094	0.118279	0.353891	0.00422498	0.110241	0.00266115		1853.71	41.6675	1913.16	18.2958	1953.15	20.1444	2113.73	48.4469
	CD01-35	172.369	138.178	400.857	0.344707		0.113963	0.00230757	5.26375	0.116659	0.331008	0.00418218	0.100147	0.00256986		1864.82	35.9575	1863	18.9534	1843.26	20.2798	1929.13	47.2142
	CD01-37	183.171	156.405	417.896	0.374267		0.113661	0.00233134	5.21004	0.108234	0.328811	0.00335493	0.0955145	0.00210206		1858.95	37.0375	1854.26	17.7418	1832.62	16.3057	1843.84	38.783
	CD01-38	108.991	32.1086	270.761	0.118586		0.112885	0.00243318	5.16044	0.114741	0.328139	0.00421885	0.109214	0.00363674		1846.61	38.89	1846.12	18.9537	1829.36	20.5009	2095.04	66.2691
	CD01-39	146.575	104.253	345.551	0.301701		0.113899	0.00237498	5.43086	0.126776	0.341838	0.00499832	0.0984733	0.0025128		1862.66	37.655	1889.74	20.0582	1895.51	24.0346	1898.36	46.2363
	Sample	TotalPb	232Th	238U	Th/U		207Pb/206Pb		207Pb/235U		206Pb/238U		208Pb/232Th			207Pb/206Pb		207Pb/235U		206Pb/238U		208Pb/232Th
							Ratio	1s	Ratio	1s	Ratio	1s	Ratio	1s		Age (Ma)	1s	Age (Ma)	1s	Age (Ma)	1s	Age (Ma)	1s
Group1	CD46-02	21.8765	6.16924	51.2881	0.120286		0.117745	0.00307378	5.70293	0.206574	0.350015	0.010913	0.0993712	0.00445188		1924.08	46.14	1931.81	31.3201	1934.67	52.1206	1914.87	81.849
	CD46-03	47.1238	10.095	120.478	0.0837917		0.112178	0.00254355	4.9614	0.119481	0.317651	0.00425334	0.0836566	0.00331138		1834.88	40.7425	1812.77	20.3881	1778.25	20.831	1623.87	61.7635
	CD46-04	14.0786	8.65561	33.6659	0.257103		0.117527	0.00402896	5.25713	0.181707	0.322871	0.0044094	0.0905801	0.00366187		1920.37	65.74	1861.93	29.5139	1803.73	21.5093	1752.6	67.8672
	CD46-05	56.1483	15.6579	137.883	0.113559		0.114861	0.00272585	5.21733	0.132413	0.325579	0.00451157	0.0921532	0.0036235		1877.47	42.59	1855.45	21.6617	1816.92	21.9621	1781.73	67.0592
	CD46-06	14.5989	8.27489	34.8619	0.237362		0.118723	0.00375934	5.41577	0.164162	0.331437	0.00540946	0.095005	0.00438004		1938.89	57.4075	1887.35	26.0125	1845.35	26.2099	1834.44	80.8493
	CD46-07	21.576	19.0753	49.0596	0.388818		0.113496	0.00326221	5.2032	0.143004	0.330303	0.00419274	0.0866152	0.00262571		1857.41	51.855	1853.14	23.4417	1839.85	20.3416	1678.98	48.8411
	CD46-09	19.1996	4.49051	47.0318	0.0954781		0.115113	0.00344473	5.31205	0.157875	0.332074	0.00521871	0.105823	0.00618704		1883.34	58.3375	1870.8	25.4282	1848.42	25.2751	2033.14	113.087
	CD46-15	20.029	11.572	48.4403	0.238892		0.11494	0.00330118	5.3146	0.163838	0.332844	0.00497454	0.0884925	0.00330251		1879.63	51.8575	1871.21	26.3757	1852.15	24.0806	1713.87	61.3243
	CD46-19	33.1337	8.71036	74.0659	0.117603		0.112423	0.00269006	5.74234	0.142469	0.367756	0.00503254	0.104247	0.00414977		1839.2	44.2925	1937.76	21.496	2018.83	23.7441	2004.32	75.9578
	CD46-22	37.5129	8.51777	97.3224	0.0875211		0.115008	0.00314387	5.20155	0.141776	0.325805	0.00410909	0.0924137	0.00371813		1879.94	48.6125	1852.87	23.2472	1818.01	20.0036	1786.55	68.7943
	CD46-23	23.0761	10.3799	55.6695	0.186456		0.113513	0.0031769	5.31697	0.145291	0.337036	0.00387948	0.0929274	0.00347703		1857.41	50.155	1871.59	23.3886	1872.39	18.7319	1796.05	64.303
	CD46-25	13.965	5.27069	34.406	0.153191		0.113411	0.00360943	5.21649	0.161915	0.334451	0.00528596	0.0906527	0.00463241		1854.63	63.1175	1855.31	26.4768	1859.92	25.5549	1753.94	85.8489
	CD46-28	38.9416	9.81101	97.4025	0.100726		0.115598	0.00267744	5.31251	0.124908	0.333002	0.00431733	0.0926842	0.00359053		1900	42.1325	1870.88	20.132	1852.91	20.9026	1791.56	66.4168
	CD46-30	22.1788	18.6878	50.5969	0.369346		0.114487	0.00344568	5.52035	0.17062	0.351242	0.00526981	0.099523	0.0030652		1872.22	54.3225	1903.77	26.6013	1940.53	25.1627	1917.66	56.3466
Group 2	CD46-01	133.44	12.6656	327.608	0.0386609		0.112221	0.00231689	5.17638	0.108716	0.331707	0.0039749	0.0953361	0.00362385		1835.5	37.19	1848.74	17.9168	1846.65	19.2672	1840.55	66.871
	CD46-08	138.482	14.5077	334.279	0.0433999		0.111266	0.0028451	5.22818	0.130986	0.336133	0.00428151	0.103301	0.00454368		1820.06	46.2975	1857.22	21.3919	1868.04	20.6815	1986.99	83.2392
	CD46-10	99.2801	9.4567	241.861	0.0390997		0.110798	0.00257364	5.3125	0.123569	0.343789	0.00428915	0.104792	0.00444155		1812.96	42.29	1870.88	19.9171	1904.87	20.6016	2014.3	81.2583
	CD46-11	132.626	12.7681	331.496	0.0385167		0.110342	0.00231044	5.18944	0.110649	0.337334	0.00397377	0.101352	0.00348836		1805.56	38.2775	1850.89	18.1956	1873.83	19.1817	1951.26	64.019
	CD46-12	144.448	12.3731	358.841	0.0344808		0.110875	0.00224944	5.13739	0.106722	0.332761	0.00395231	0.0989862	0.00349762		1813.88	37.035	1842.31	17.7008	1851.75	19.143	1907.79	64.3272
	CD46-13	99.2211	14.1208	245.925	0.0574192		0.111181	0.0025166	5.25992	0.131071	0.338853	0.00427385	0.0993756	0.00407766		1820.37	42.13	1862.38	21.2978	1881.15	20.6031	1914.95	74.9685
	CD46-14	175.189	64.0861	434.952	0.147341		0.10961	0.00277467	4.98362	0.146304	0.326661	0.00683976	0.0983268	0.00340913		1794.44	46.3	1816.55	24.8576	1822.18	33.2498	1895.66	62.7374
	CD46-16	150.981	14.7768	366.19	0.0403528		0.111891	0.00255195	5.25418	0.132019	0.337192	0.00441211	0.0930876	0.00329894		1831.49	41.8225	1861.45	21.4709	1873.15	21.2942	1799.02	61.0005
	CD46-17	36.1774	8.58539	91.7921	0.0935307		0.111332	0.00287112	5.15461	0.142011	0.332846	0.00431187	0.0971796	0.00415589		1821.3	79.7825	1845.16	23.4624	1852.16	20.8787	1874.54	76.5597
	CD46-18	73.5212	10.2437	172.127	0.0595126		0.111014	0.00291329	5.34615	0.139389	0.346418	0.00409656	0.122555	0.00610615		1816.66	48.1525	1876.27	22.3388	1917.47	19.6409	2336.68	109.945
	CD46-20	94.846	10.5504	241.369	0.0437106		0.111216	0.00229444	5.19628	0.112968	0.335763	0.00394599	0.100038	0.0045066		1820.37	38.12	1852.01	18.5549	1866.25	19.0701	1927.14	82.8048
	CD46-21	116.167	11.0139	292.783	0.0376177		0.110942	0.00222698	5.15709	0.103629	0.333675	0.00324318	0.0983397	0.003603		1816.66	31.02	1845.56	17.1357	1856.17	15.7081	1895.9	66.3044
	CD46-24	89.5084	17.4482	223.996	0.077895		0.110983	0.00259111	5.06655	0.131762	0.328062	0.00487089	0.0974017	0.00364983		1816.66	42.285	1830.52	22.0886	1828.98	23.6639	1878.63	67.2235
	CD46-26	210.281	95.9837	507.193	0.189245		0.11048	0.00219559	5.15367	0.110539	0.335695	0.00356834	0.100681	0.00262945		1807.1	35.34	1845	18.2826	1865.92	17.2512	1938.94	48.2857
	CD46-27	190.771	59.0942	462.739	0.127705		0.111696	0.00218657	5.14146	0.10923	0.331863	0.00421067	0.100157	0.0030026		1827.78	35.495	1842.98	18.1026	1847.41	20.4047	1929.32	55.1642
	CD46-29	304.256	119.976	734.003	0.163454		0.111724	0.00224698	5.07163	0.109171	0.328423	0.00389038	0.098166	0.00220331		1827.47	37.195	1831.37	18.2995	1830.74	18.9047	1892.7	40.5529
	Sample	TotalPb	232Th	238U	Th/U		207Pb/206Pb		207Pb/235U		206Pb/238U		208Pb/232Th			207Pb/206Pb		207Pb/235U		206Pb/238U		208Pb/232Th
							Ratio	1s	Ratio	1s	Ratio	1s	Ratio	1s		Age (Ma)	1s	Age (Ma)	1s	Age (Ma)	1s	Age (Ma)	1s
Group 1	CD32-05	74.2702	74.4193	106.979	0.695647		0.158005	0.00366318	10.1294	0.237797	0.460708	0.00511463	0.136916	0.00327052		2434.26	39.1925	2446.65	21.759	2442.68	22.6104	2593.62	58.1437
	CD32-06	71.3938	73.3739	100.41	0.730741		0.158187	0.00349391	10.6554	0.255812	0.484203	0.00661205	0.137815	0.00345525		2436.11	37.34	2493.55	22.3499	2545.55	28.7513	2609.6	61.3793
	CD32-07	84.2063	42.7124	118.762	0.359648		0.171861	0.00385325	12.4273	0.300585	0.520731	0.00708947	0.154134	0.00485159		2575.62	36.8825	2637.25	22.8011	2702.28	30.0878	2897.43	84.9653
	CD32-08	135.415	139.302	189.586	0.734769		0.160878	0.00381588	10.9449	0.29801	0.489661	0.00818549	0.131932	0.00391431		2465.12	40.5875	2518.46	25.3904	2569.21	35.4494	2504.81	69.8955
	CD32-09	247.672	246.968	368.795	0.669661		0.150023	0.00324515	9.06533	0.222479	0.435119	0.00659917	0.130761	0.00339938		2345.99	36.73	2344.62	22.5001	2328.75	29.6695	2483.9	60.7635
	CD32-11	46.3587	54.2812	64.6906	0.839089		0.152375	0.00374762	10.1802	0.271202	0.481614	0.00716254	0.147513	0.00414543		2372.53	41.1975	2451.28	24.6869	2534.29	31.1938	2781.14	73.0174
	CD32-12	94.12	101.83	116.944	0.870755		0.158298	0.00341583	11.0439	0.241199	0.50193	0.00609251	0.140495	0.00308722		2438.89	63.12	2526.84	20.4072	2622.09	26.1879	2657.15	54.7127
	CD32-13	177.473	184.915	235.643	0.784728		0.158105	0.00330155	10.2526	0.234266	0.466071	0.00698766	0.137176	0.00344071		2435.49	36.2625	2457.83	21.2052	2466.31	30.7541	2598.24	61.1554
	CD32-14	54.6374	81.4468	80.3584	1.01354		0.156823	0.00400351	9.27534	0.215354	0.426745	0.00536005	0.109931	0.0028493		2421.91	43.515	2365.59	21.3414	2291.03	24.2497	2108.1	51.8867
	CD32-15	99.6059	201.401	126.408	1.59326		0.148756	0.00356624	9.03294	0.221366	0.434399	0.005556	0.112918	0.0026291		2331.8	35.9575	2341.35	22.4598	2325.52	25.0011	2162.41	47.7484
	CD32-18	52.3219	28.1538	86.2715	0.32634		0.152131	0.00347523	9.45624	0.233435	0.446516	0.00680764	0.118007	0.00482465		2370.06	38.885	2383.31	22.7262	2379.75	30.3655	2254.63	87.2239
	CD32-21	133.222	187.251	166.85	1.12227		0.165907	0.00344326	11.0201	0.217424	0.479126	0.00433256	0.131555	0.00287266		2516.97	35.185	2524.83	18.4467	2523.46	18.9315	2498.08	51.3124
	CD32-23	30.5099	34.7051	43.9516	0.78962		0.162371	0.00421577	10.1984	0.262722	0.455552	0.00614382	0.12646	0.00371093		2480.55	43.8275	2452.93	23.8799	2419.89	27.2414	2406.87	66.5857
	CD32-25	29.5259	32.0535	41.574	0.770997		0.164311	0.00445816	10.6354	0.330125	0.467366	0.00909955	0.141264	0.00440331		2501.85	45.6775	2491.81	28.8586	2472	39.9983	2670.78	77.9843
	CD32-27	49.8845	51.4588	70.7023	0.727824		0.171097	0.00415428	11.2921	0.290487	0.476725	0.00717274	0.137538	0.0038248		2568.21	40.4325	2547.55	24.058	2512.98	31.3409	2604.67	67.9606
	CD32-33	33.3224	35.2869	50.7688	0.695051		0.158405	0.00467145	9.98821	0.311071	0.458755	0.00868175	0.148552	0.00467265		2438.58	49.9975	2433.69	28.7926	2434.06	38.3882	2799.43	82.2294
Group 2	CD32-01	299.034	109.785	424.674	0.258517		0.157485	0.00336405	11.0581	0.260836	0.502009	0.00688605	0.164456	0.00446109		2428.7	36.11	2528.03	22.0316	2622.43	29.5879	3077.39	77.4341
	CD32-02	72.0976	149.435	88.8815	1.68128		0.160806	0.00393682	10.1676	0.241617	0.454749	0.00540253	0.128129	0.0028975		2463.89	41.36	2450.14	22.0314	2416.33	23.9757	2436.8	51.9133
	CD32-03	49.8263	81.9239	56.1721	1.45844		0.160196	0.00389243	12.3172	0.353755	0.552589	0.0105232	0.146118	0.00383969		2457.71	41.0525	2628.89	27.0315	2835.93	43.7197	2756.56	67.7143
	CD32-04	27.2486	19.5411	36.3684	0.537311		0.159094	0.00664109	10.2242	0.401126	0.465272	0.0122295	0.164141	0.00754577		2445.98	71.4475	2455.27	36.3257	2462.79	53.8196	3071.92	131.012
	CD32-10	58.9233	26.8953	79.149	0.339806		0.148042	0.00372361	11.3238	0.335725	0.548888	0.00915102	0.173471	0.00743048		2323.15	42.9025	2550.16	27.7154	2820.54	38.1166	3233.27	127.985
	CD32-16	68.5977	46.0212	92.9556	0.495088		0.157705	0.00398892	11.0464	0.299327	0.503904	0.00950021	0.130656	0.0040514		2431.17	42.8975	2527.05	25.2886	2630.55	40.747	2482.03	72.425
	CD32-17	60.801	80.9389	76.4784	1.05832		0.163592	0.00447989	10.6008	0.320369	0.467197	0.01004	0.126029	0.00397445		2494.45	46.3	2488.78	28.0919	2471.26	44.1327	2399.14	71.3415
	CD32-19	89.0557	81.4086	132.29	0.615381		0.158105	0.00356022	10.1501	0.245804	0.461802	0.00678776	0.124664	0.00420997		2435.49	37.495	2448.54	22.446	2447.51	29.9626	2374.62	75.6606
	CD32-20	5.63379	9.82345	7.19138	1.366		0.158622	0.00834466	11.0652	0.708155	0.499486	0.0146601	0.113975	0.00537811		2442.59	88.7325	2528.63	59.6218	2611.59	63.041	2181.6	97.5818
	CD32-22	60.6356	59.4475	98.5498	0.603223		0.157934	0.00386777	10.0739	0.416583	0.452611	0.0132815	0.116051	0.00558753		2435.18	42.1275	2441.58	38.2333	2406.85	58.955	2219.23	101.193
	CD32-26	59.5978	57.644	89.0221	0.647525		0.16915	0.00337417	11.0771	0.248564	0.47178	0.00642434	0.127604	0.00345356		2549.07	33.335	2529.64	20.9686	2491.36	28.1708	2427.39	61.9049
	CD32-28	34.2929	61.863	57.0204	1.08493		0.139845	0.00346389	7.80801	0.209207	0.402421	0.00592964	0.120106	0.00333926		2224.99	75	2209.13	24.164	2180.18	27.2818	2292.54	60.2568
	CD32-29	63.6122	43.0878	92.8943	0.463837		0.163615	0.00360826	10.7842	0.269823	0.473278	0.00691818	0.1531	0.00527392		2494.45	37.04	2504.7	23.3117	2497.92	30.3009	2879.32	92.4444
	CD32-30	30.2997	23.3886	39.7891	0.587814		0.157691	0.00449198	12.0501	0.406475	0.550934	0.0126909	0.140075	0.00493389		2431.17	48.145	2608.31	31.6762	2829.05	52.7717	2649.69	87.4724
	CD32-32	98.1874	67.494	153.77	0.438929		0.166362	0.00378975	11.3839	0.28343	0.49412	0.00678155	0.140458	0.00419359		2521.3	38.2725	2555.11	23.3038	2588.47	29.2925	2656.49	74.3226
	CD32-34	61.6215	72.8839	93.2604	0.781509		0.163657	0.00391491	10.3481	0.265677	0.457623	0.00664647	0.130641	0.00426581		2493.52	73.6125	2466.42	23.8308	2429.06	29.4236	2481.76	76.2589
Group 3	CD32-24	67.6541	127.738	133.232	0.958762		0.114322	0.00376235	5.01327	0.162847	0.318498	0.00509094	0.0906886	0.00285175		1869.45	59.2625	1821.57	27.5257	1782.39	24.9093	1754.61	52.8476

## Sheet: Table S3
Table S3. LA-ICP-MS REE analytical results of the zircons of mafic granulites and amphibolites from the Chengde Complex.
	Name	La	Ce	Pr	Nd	Sm	Eu	Gd	Tb	Dy	Ho	Er	Tm	Yb	Lu
Group 1	CD03-06	0.00238289	0.567081	0.00363476	0.0484982	0.0817336	0.0660898	0.928934	0.265477	3.07149	0.764788	2.76294	0.454	3.38742	0.592601
	CD03-07	0	1.67463	0.00766693	0	0.604576	0.307222	2.62642	0.512963	5.2219	1.12331	3.66351	0.630286	4.98719	0.92222
	CD03-10	0	0.236628	0.00194286	0.00861379	0.0146123	0.155961	0.977476	0.379796	4.91204	1.61265	6.57848	1.20823	10.0374	1.71328
	CD03-11	0.00695192	0.977434	0.00177217	0.314003	0.839377	0.754186	6.75381	1.54144	11.1115	2.16645	6.10165	0.830092	6.21398	0.913606
	CD03-12	0	1.84601	0.00936877	0.14512	0.299233	0.324561	2.1942	0.556545	4.45708	1.04439	2.75267	0.485277	3.50723	0.544458
	CD03-16	0	0.354111	0.00618051	0	0.0772901	0.0794823	0.705733	0.291109	3.56552	1.30939	5.13661	0.920785	9.28522	1.61688
	CD03-17	0.0112025	1.51707	0.00427429	0.0991663	0.41662	0.306246	2.66196	0.631411	6.22259	1.37499	4.69606	0.755466	6.86201	1.02711
	CD03-20	0.00887291	0.587469	0.00207286	0.0914649	0.268123	0.196408	2.79584	0.715057	8.15332	2.27541	7.13505	1.11686	8.57037	1.48192
	CD03-21	0.0197485	1.88323	0.00146824	0.238347	0.607216	0.38995	3.44181	0.764021	5.86235	1.30154	3.94529	0.629849	4.89975	0.809093
	CD03-26	0.179207	0.689819	0.0346623	0.0489155	0.194918	0.146599	1.21631	0.398127	4.70167	1.42085	4.64846	0.750816	6.6863	0.940494
	CD03-29	0.00235562	0.776037	0.00535844	0.110791	0.334899	0.253961	2.32413	0.643196	6.48742	1.73683	6.56218	1.25415	12.5379	2.31882
	CD03-30	0	0.698484	0.00219001	0.0954093	0.229969	0.200364	1.79561	0.541942	5.43082	1.79769	7.11646	1.25904	12.5648	2.03424
	CD03-32	0.00505612	1.64689	0.0019186	0.187197	0.417407	0.295076	2.111	0.393137	3.10558	0.599413	1.52446	0.223769	1.80241	0.270714
	CD03-37	0.0128329	1.32866	0.00654351	0.172771	0.240219	0.225811	1.26478	0.28711	4.30147	1.31996	5.3943	0.969053	10.1651	1.59243
	CD03-38	0.0113483	1.49691	0.00434362	0.152772	0.493091	0.431002	3.10946	0.809318	6.09863	1.2989	4.00238	0.596729	4.35668	0.694903
	CD03-39	0.0249593	1.28962	0.0152983	0.201586	0.447047	0.354278	4.0188	1.01594	10.2986	2.48466	7.14549	1.17799	8.47115	1.17689
Group 2	CD03-02	0.00716244	1.57279	0.00345013	0.103412	0.595531	0.474348	3.70428	0.824641	6.16142	1.58591	4.68499	0.733791	6.5422	1.0153
	CD03-05	0	0.948101	0.00205069	0.218741	0.905155	0.759366	6.37192	1.49564	10.7574	1.87197	4.35384	0.668376	4.60259	0.562781
	CD03-09	0.0113294	1.06294	0.00649048	0.0576033	0.520902	0.389565	4.69977	1.32088	10.4148	1.91959	4.77648	0.654708	4.42705	0.542459
	CD03-13	0.00708934	3.41632	0.0162842	0.247314	0.638824	0.382564	3.01356	0.858069	7.57123	2.11976	6.70465	0.967132	8.02585	1.22184
	CD03-18	0.0066748	2.92812	0.0432456	0.3815	1.20153	0.883618	7.50153	1.93231	15.0851	3.11276	7.53975	0.966027	7.24892	0.896974
	CD03-19	0.0137408	1.52322	0.0125541	0.092307	0.475911	0.426962	3.2435	0.670088	4.43703	0.95143	2.3554	0.313157	2.94659	0.414435
	CD03-33	0.0309032	2.98152	0.0494688	1.02279	1.93875	0.855538	4.80022	0.91605	6.45434	1.10321	2.86216	0.409165	3.16971	0.410594
	CD03-36	0.0160808	1.56309	0.0245781	0.0884881	0.578897	0.468421	4.15756	0.836207	5.38897	1.29962	4.17489	0.670244	4.26332	0.673671
	CD03-40	0.0166497	1.41378	0.0102825	0.0940038	0.479541	0.326931	2.58162	0.684663	5.52045	1.36611	4.2729	0.662855	6.47739	0.987477
Group 3	CD03-01	0.00539261	4.71819	0	0.10961	0.336616	0.183293	2.1362	0.965311	12.975	5.3982	27.9615	6.07751	67.3974	13.0499
	CD03-03	0.00715127	5.3708	0.0163848	0.193909	0.569821	0.289795	3.5953	1.58349	20.9924	8.14211	39.4315	8.56633	98.6713	16.5853
	CD03-04	0.134187	6.91092	0.139813	1.07991	0.810236	0.352473	3.73476	1.28791	18.1602	6.40723	26.2908	5.13442	48.3922	8.77857
	CD03-08	0.00543832	5.10401	0.00396374	0.184572	0.576835	0.252026	3.92183	1.36993	16.7311	6.03323	26.3351	5.30068	57.1687	10.6384
	CD03-14	0.0072592	3.67054	0.00278064	0	0.117566	0.135118	2.15538	0.835658	10.9547	4.28313	19.1796	3.66725	36.8262	7.22915
	CD03-15	0	4.81519	0	0.0971313	0.282557	0.247797	3.59899	1.48231	20.1808	8.02017	37.7696	7.92371	84.4837	15.4142
	CD03-22	0.300622	7.89694	0.11405	1.11176	0.801391	0.398402	4.0107	1.11598	11.5297	3.36641	12.6119	2.16327	19.677	3.40963
	CD03-23	0.0381915	4.32425	0.0275204	0.302064	0.482351	0.255809	3.10121	1.24135	18.5091	7.98012	38.3356	8.55141	96.5186	19.0673
	CD03-24	0.0397913	8.51351	0.0150619	0.239442	0.632104	0.314844	5.52083	2.20882	30.37	13.2215	64.845	13.8776	149.66	29.0438
	CD03-25	0.0426389	4.55525	0.0205495	0.207816	0.478457	0.284066	2.6487	0.868173	10.6623	3.33317	13.6054	2.47702	25.9501	4.47828
	CD03-27	0.0365789	3.46929	0.0277191	0.0981806	0.522339	0.187395	2.04279	1.13677	14.0907	6.00615	27.5806	6.15	66.5028	13.0948
	CD03-28	0	4.15657	0.00451209	0.119904	0.473723	0.402709	3.41041	1.1424	15.3168	5.80917	28.2272	6.14036	63.5046	12.5842
	CD03-31	0.0985155	5.06273	0.0283507	0.297092	0.406	0.247974	3.393	1.00861	13.0462	4.83858	23.3016	4.59478	46.8681	9.40194
	CD03-34	0	3.40032	0.00913026	0.120868	0.2026	0.143557	2.3221	0.835519	11.6245	4.83064	24.4589	5.38723	55.9065	10.9121
	CD03-35	0.00302348	5.07067	0.0138515	0.101778	0.391785	0.187178	3.61228	1.3752	17.654	6.7527	28.7218	5.80506	54.7675	10.1217
	Name	La	Ce	Pr	Nd	Sm	Eu	Gd	Tb	Dy	Ho	Er	Tm	Yb	Lu
Group 1	CD01-04	0.0040449	2.0924	0	0.328841	0.665998	0.482855	3.06391	0.681177	5.90827	1.72854	6.11997	1.17529	9.27668	1.71161
	CD01-07	0.0149469	2.52826	0.0103826	0.266035	1.12051	0.87082	3.90178	0.902306	7.65613	1.98852	6.56398	1.07823	7.46846	1.46386
	CD01-09	0.0534522	1.99927	0.00446914	0.254146	0.582127	0.470621	2.63622	0.597659	4.67109	1.20007	3.65879	0.711567	5.05205	0.873115
	CD01-12	0.00980316	2.14893	0.0027919	0.198886	0.471006	0.316972	1.5144	0.464337	4.11354	1.15857	3.96545	0.621705	5.17574	1.04931
	CD01-13	0.00960082	2.92794	0.0244906	0.305154	0.718091	0.728115	7.07984	2.60301	30.377	10.1032	38.2204	7.32089	59.8758	10.6816
	CD01-19	0.0137202	2.02773	0.0153472	0.173847	0.672948	0.471785	3.00136	0.876884	9.1233	2.83867	10.9242	1.9913	17.937	3.27678
	CD01-23	0.0277199	2.88886	0.024886	0.239869	0.415972	0.32572	2.05413	0.467174	4.58602	1.33047	4.649	0.785512	6.0444	1.29
	CD01-28	0	4.01577	0.0273544	0.21016	0.302784	0.338487	1.94175	0.370785	3.93318	0.997156	3.14621	0.498631	3.64318	0.708635
	CD01-30	0.0159839	2.59975	0.00492907	0.238476	0.528666	0.446734	2.77946	0.627891	4.68301	1.25977	4.3464	0.765692	6.69523	1.14798
	CD01-31	0.0495495	2.20074	0.0187463	0.240172	0.665334	0.434908	3.36905	0.804269	7.08062	2.26568	8.16153	1.66704	16.2237	3.20127
	CD01-40	0.00343979	1.98822	0.00571512	0.141326	0.797465	0.422274	2.99735	0.84308	7.95366	3.08902	12.488	2.8237	23.5187	5.01497
	CD01-08	0	1.67255	0.00461008	0.144121	0.665105	0.472433	2.86756	0.684703	6.24698	1.64687	5.42766	0.908273	6.81423	1.4058
	CD01-32	0.0124247	1.76346	0.00765874	0.12314	0.484774	0.551903	3.36727	0.763678	6.04984	1.62304	5.86047	0.985977	7.71788	1.48479
Group 2	CD01-01	0.038034	4.73221	0.00963475	0.22917	0.333382	0.233054	2.24641	0.658981	6.37615	1.85544	6.72826	1.35538	10.7228	2.06699
	CD01-02	0.146303	5.14743	0.0586503	0.578395	0.577534	0.434705	3.48237	1.1617	10.9892	3.30919	11.9873	2.11625	15.7416	3.31438
	CD01-03	0.376784	7.08355	0.194176	0.969355	0.689567	0.335073	2.6488	0.664934	5.71913	1.49461	5.61505	0.893386	7.05028	1.36229
	CD01-05	0.0576147	5.0302	0.0514061	0.488202	0.826902	0.517065	2.74078	0.866219	7.62622	2.30872	8.41085	1.48025	11.2794	2.17849
	CD01-06	0.0573642	5.01008	0.0343421	0.463563	0.488546	0.476768	3.47984	1.10607	10.2974	3.17067	11.133	1.93588	15.5167	2.99598
	CD01-10	0.203584	4.37966	0.0556643	0.39659	0.545781	0.228111	2.5654	1.03348	14.4236	6.06236	27.1483	5.42079	44.6786	6.9478
	CD01-11	0.00404541	4.59437	0.066306	0.236289	0.120112	0.192079	2.02332	0.735095	4.33954	1.84381	7.26916	1.03742	8.62589	1.71489
	CD01-14	0.0033304	5.11537	0.00509079	0.362283	0.453316	0.394005	2.92068	0.814505	8.08911	2.64156	9.04022	1.43151	13.3425	2.51106
	CD01-15	0.322392	7.0539	0.0769029	0.820493	0.900777	0.521117	2.23375	0.451542	5.4708	1.47904	4.72369	0.825751	6.2953	1.01705
	CD01-16	0.0176552	5.85096	0.0403782	0.478434	0.984702	0.260751	2.04561	0.495097	4.97984	1.59033	5.81772	0.922891	8.34959	1.54337
	CD01-17	0.00708145	5.08887	0.0242626	0.526776	0.720885	0.470339	4.05584	1.18454	11.4227	3.48694	13.1508	2.30378	18.1381	3.53817
	CD01-18	0.162795	5.76351	0.0229864	0.621141	0.786504	0.561157	3.20338	1.01864	9.32407	2.59221	8.74518	1.54698	12.6194	2.23039
	CD01-20	0.0127511	5.78141	0.0460166	0.29854	0.441564	0.23354	2.69424	0.546386	4.46094	1.41503	4.82397	0.744271	5.43092	0.948824
	CD01-22	0.00886242	5.85198	0.017024	0.268825	0.522794	0.227718	1.74425	0.492033	4.83606	1.4282	4.26755	0.725651	5.17769	1.13902
	CD01-24	0.0918299	4.93284	0.0309608	0.464283	0.517608	0.319695	2.33707	0.874076	8.34019	2.56686	8.78042	1.55329	14.8948	2.50298
	CD01-25	0.0376878	5.36392	0.0541421	0.43352	0.495091	0.315026	2.76586	0.607372	5.92062	1.77703	7.11324	1.22349	10.6487	2.04239
	CD01-26	0.0314102	5.64665	0.0303038	0.637397	0.624636	0.380089	2.6159	0.59823	5.37363	1.86968	6.08082	0.911265	8.06356	1.37879
	CD01-27	0.0200638	4.44942	0.0464434	0	0.272857	0.462941	1.1568	0.755543	6.4053	1.89881	6.90485	1.17141	7.08607	1.2114
	CD01-33	0.150704	5.45523	0.0341434	0.244777	0.608249	0.595006	2.30298	0.640345	5.89835	1.82848	7.30742	1.21301	11.3209	1.71301
	CD01-34	0	5.46826	0.0134431	0.0602014	0.39049	0.318335	1.74646	0.404709	4.82899	1.38757	4.74633	0.786714	5.92738	1.0667
	CD01-36	0.00745775	4.01466	0.0200048	0.125052	0.550621	0.269551	2.3159	0.679435	6.78518	2.19391	7.94621	1.38469	11.6988	2.18849
	CD01-41	0	5.58602	0.0338086	0.167998	0.713605	0.384744	2.97826	0.785629	5.39627	1.58738	5.08615	0.796098	6.09919	1.23244
Group 3	CD01-21	0.0103562	4.85479	0.0291343	0.302491	0.63896	0.320437	2.77771	0.546722	5.10282	1.42873	5.44599	1.0484	6.70664	1.28461
	CD01-29	0.00283369	4.9724	0	0.25743	0.50049	0.382209	2.8549	0.683341	6.22958	1.6594	5.99997	1.07333	8.57792	1.62849
	CD01-35	0.0032897	4.08999	0.0151378	0.265295	0.430191	0.237897	1.74804	0.559695	5.84627	1.7351	6.58906	1.11909	8.78944	1.64131
	CD01-37	0.0160898	4.43254	0.00492908	0.192938	0.310352	0.220357	1.85499	0.590397	4.81131	1.64589	5.19846	0.950119	7.115	1.32666
	CD01-38	0.0109434	4.7017	0.016751	0.316822	0.620163	0.418171	2.94299	0.734299	5.52173	1.62263	5.33716	0.832858	6.93117	1.20844
	CD01-39	0.0198604	4.63651	0.022784	0.132425	0.468432	0.275144	2.43254	0.696661	4.73594	1.55677	5.34394	0.875279	6.79874	1.25066
	Name	La	Ce	Pr	Nd	Sm	Eu	Gd	Tb	Dy	Ho	Er	Tm	Yb	Lu
Group 1	CD46-02	0.00670108	0.944921	0.00257295	0.0606488	0.282073	0.134385	1.54871	0.507704	4.93722	1.56755	6.01067	0.968781	8.26872	1.47989
	CD46-03	0.00298943	3.43166	0.0114822	0.127375	0.375668	0.288924	2.01306	0.580483	4.54184	1.34914	4.04976	0.602856	4.75088	0.760289
	CD46-04	0.00776124	1.32838	0.00397604	0.0520749	0.233203	0.108532	1.96541	0.561108	5.45286	1.49733	4.49167	0.782749	5.35113	0.857899
	CD46-05	0.00667338	2.1482	0.00256492	0.0671375	0.18834	0.08774	0.973752	0.32991	4.06787	1.21745	4.39195	0.65016	5.14917	1.02851
	CD46-06	0.00508241	1.28387	0.00586226	0.094611	0.258678	0.241145	2.04336	0.697828	6.6278	1.86113	5.93695	0.96531	6.03353	0.99379
	CD46-07	0	1.82351	0.0128203	0.127652	0.202348	0.165147	1.98049	0.559722	5.79281	1.53281	4.64859	0.744676	4.48802	0.754519
	CD46-09	0	0.896262	0.00861932	0.0757299	0.191843	0.128414	1.63195	0.522267	5.22612	1.41278	4.86513	0.752758	5.70431	1.0109
	CD46-15	0.00271252	2.7323	0.00623023	0.0922993	0.12118	0.10912	1.05684	0.310128	2.95078	0.835708	2.75155	0.481404	3.86175	0.579368
	CD46-19	0.00507433	1.95379	0.00644685	0.151972	0.748266	0.349549	2.60549	0.82159	6.82084	1.88967	5.60217	0.940723	6.48494	1.18733
	CD46-22	0.00572133	2.00381	0.0131534	0.212303	0.550269	0.324853	3.59736	1.19301	10.8535	2.53414	7.36107	1.13173	6.64968	0.945782
	CD46-23	0	2.00226	0.0118513	0.180074	0.509773	0.284638	3.57771	1.03224	8.94688	2.12095	5.88302	0.840383	4.98323	0.917287
	CD46-25	0	0.948575	0	0.0278968	0.187789	0.130128	1.32237	0.467786	4.3526	1.28117	4.29097	0.679682	5.16685	0.837302
	CD46-28	0.0110172	3.22736	0.0211952	0.334872	1.1642	0.754419	5.64157	1.22738	10.816	2.67136	8.15008	1.16992	8.55184	1.6702
	CD46-30	0	2.09672	0.0149257	0.310674	0.559522	0.326805	3.54328	1.13509	11.0375	2.89583	9.01863	1.3733	9.04075	1.38001
Group 2	CD46-01	0	4.35312	0.0129685	0.319722	0.739794	0.338704	3.01128	0.649178	4.99673	1.28141	4.29778	0.699593	4.50157	0.946969
	CD46-08	0.0354274	5.11132	0.0408914	0.514229	1.02008	0.611436	4.83832	1.03835	9.67788	2.53906	8.18484	1.12208	7.97845	1.66897
	CD46-10	0	4.12928	0.0249436	0.329382	0.833469	0.433586	3.56589	0.715122	6.76761	1.97672	5.76339	0.815241	6.62081	1.16074
	CD46-11	0.00289387	4.6178	0.0190818	0.293709	0.758869	0.473887	3.32234	0.76529	6.82442	1.79012	5.27156	0.843537	5.78019	1.1116
	CD46-12	0.0062452	4.68256	0.0143651	0.317387	0.730092	0.439507	2.54995	0.633822	4.91471	1.32621	3.69756	0.656117	4.81015	0.882092
	CD46-13	0.0101033	4.60208	0.0081823	0.571338	0.770103	0.511012	3.51781	0.741733	6.36008	1.49765	5.18236	0.884152	5.93288	1.0852
	CD46-14	0.0439432	2.52771	0.0192341	0.127981	0.394053	0.183642	1.98987	0.557731	5.65208	1.73402	7.02765	1.17324	9.79359	1.81881
	CD46-16	0	4.91516	0.026782	0.524738	1.11915	0.553351	4.5517	0.994891	8.5075	2.36942	7.3985	1.11935	7.91393	1.5572
	CD46-17	0	2.01668	0.0126147	0.328961	0.733763	0.491938	4.67555	1.50726	12.3873	3.04214	7.82428	1.14079	7.27549	1.20871
	CD46-18	0.034702	3.60872	0.0124988	0.427672	0.579592	0.388968	2.65641	0.60957	4.84905	1.44268	4.35024	0.709506	4.93969	0.790109
	CD46-20	0.00303312	4.19031	0.0255585	0.492283	0.945653	0.458113	3.94004	0.811741	6.97957	2.07503	6.83847	1.0792	7.79225	1.43909
	CD46-21	0	4.84768	0.0118286	0.28337	0.821821	0.457052	3.66543	0.747217	6.20185	1.69357	5.52823	0.970357	7.11488	1.15622
	CD46-24	0.00283665	2.45151	0.00719113	0.175871	0.349579	0.28795	1.94847	0.55321	5.08636	1.33684	4.18841	0.654344	5.75807	0.884733
	CD46-26	0.0328052	4.38473	0.0189176	0.1659	0.670473	0.380582	3.56708	0.911348	7.10643	1.94074	6.38726	0.994172	7.76701	1.47437
	CD46-27	1.79501	4.29813	0.219562	1.21479	0.665177	0.49512	3.12345	0.76017	6.02242	1.80164	6.25974	1.1942	9.224	1.56589
	CD46-29	0.103817	3.57874	0.0399612	0.328385	0.566676	0.265041	1.67273	0.573002	5.39158	1.64263	6.27655	1.11925	8.4323	1.55188
	Name	La	Ce	Pr	Nd	Sm	Eu	Gd	Tb	Dy	Ho	Er	Tm	Yb	Lu
Group 1	CD32-05	0.0109308	23.4955	0.0459331	0.878705	1.6596	0.698834	10.3353	3.64363	46.2678	19.525	98.0613	22.684	226.309	53.3058
	CD32-06	0.013182	9.52269	0.0442619	0.810143	1.99775	0.339463	8.15858	2.57981	28.2603	10.5308	46.7376	10.1787	94.7095	20.2722
	CD32-07	0.00236579	4.98091	0.0432772	0.773993	1.89546	0.596079	10.5434	3.27184	35.7443	13.065	54.9955	11.7404	108.237	23.8381
	CD32-08	0.0256999	14.8448	0.0770124	1.48612	2.46134	0.354417	10.7311	3.2929	36.6451	14.0917	62.402	13.5127	124.296	28.2219
	CD32-09	0.00971384	25.3828	0.0197979	0.486069	1.19493	0.410847	6.84015	2.1335	26.0646	10.6445	55.441	12.6402	134.163	34.37
	CD32-11	0.0175145	15.3695	0.0843158	1.38562	2.56627	0.915735	12.9694	4.1088	47.3045	17.8045	87.8125	19.8319	196.19	45.625
	CD32-12	0.0123037	17.1335	0.0424477	0.968318	1.37921	0.560442	7.71561	2.54405	30.1527	12.2641	61.6108	14.6453	151.41	34.8606
	CD32-13	0.00683295	22.8558	0.0393296	0.678712	1.33521	0.51048	6.76301	2.41456	28.0754	12.0668	60.3844	14.3385	152.954	37.3218
	CD32-14	0.00721287	20.134	0.195794	3.31383	4.6785	1.54352	22.4703	6.26354	71.5542	27.3385	127.785	28.9579	266.619	59.7789
	CD32-15	0.000745143	12.1197	0.0185166	0.32573	0.668871	0.261723	2.90416	1.0241	11.5757	4.90662	24.5896	6.24921	64.2574	15.1036
	CD32-18	0.0124227	6.91226	0.00722113	0.319592	0.580853	0.232455	2.81165	1.05671	12.9173	5.93782	32.3984	8.29973	95.6657	24.0239
	CD32-21	0.18094	29.7843	0.0997296	1.23981	1.67696	0.692373	7.70568	2.30208	24.9173	10.147	49.9019	11.8606	124.829	31.1063
	CD32-23	0.00182015	14.8581	0.111798	2.03045	3.33519	1.32183	12.0631	3.55114	38.3081	14.546	68.6727	14.9232	145.674	33.4713
	CD32-25	3.94811	19.9283	0.792936	3.52147	2.93114	0.884357	9.89504	2.87488	33.6254	13.9807	65.3864	14.6722	144.531	34.7657
	CD32-27	0	14.8344	0.0586497	1.06768	2.15668	0.799816	8.06126	2.46516	27.9525	11.1526	56.7346	13.3626	133.832	32.5527
	CD32-33	0.0107856	14.4425	0.0356432	1.17396	1.64339	0.645218	8.78266	2.59616	28.8289	11.3322	53.9067	12.2748	113.124	26.6724
Group 2	CD32-01	0.0436229	35.8018	0.170363	2.22898	3.12465	0.951378	12.4754	3.46947	35.393	12.901	55.0056	11.7063	113.416	23.4703
	CD32-02	0.00482537	10.9961	0.018943	0.398406	0.791245	0.297569	3.02331	1.07793	12.5622	4.90494	24.7678	6.17032	64.2842	15.8558
	CD32-03	0.0122478	9.85612	0.0257958	0.35747	0.570288	0.245441	2.65631	0.804968	9.74454	3.5892	19.1631	4.50085	50.634	12.6618
	CD32-04	0.00259627	12.1423	0.0466718	0.250923	0.58432	0.381719	4.76377	1.4707	17.9045	7.45003	35.6801	8.74344	91.5984	18.5634
	CD32-10	0	10.5101	0.0170153	0.4991	0.689984	0.150791	3.12087	0.995432	13.9466	5.51095	27.8647	6.47964	66.1542	15.6335
	CD32-16	0	12.958	0.0365237	0.612048	1.24998	0.427669	6.38731	2.14449	26.7404	11.0006	54.1065	12.7174	127.376	28.937
	CD32-17	0.0177011	10.6015	0.0117897	0.445454	0.62652	0.277798	3.47706	1.20629	14.8667	5.73591	29.7791	6.92991	73.8617	17.9397
	CD32-19	0.00327648	12.8743	0.030719	0.391128	0.526193	0.248604	4.03575	1.22096	16.6023	6.72513	34.4567	8.28281	89.6879	20.6108
	CD32-20	0.00390075	12.8115	0.027006	0.48131	1.33009	0.352422	7.51107	2.40655	29.2877	12.0536	56.8085	12.1945	118.872	24.4991
	CD32-22	0.0187254	8.82905	0.0191976	0.384768	0.72476	0.271779	3.12448	0.923954	10.7475	4.62616	23.2712	5.95566	68.3238	16.6594
	CD32-26	0.00276214	7.84438	0.01492	0.151399	0.452554	0.153972	2.52721	0.738402	9.74796	4.26756	21.7723	5.26177	58.7437	14.1758
	CD32-28	0.00268188	8.4461	0.0186527	0.367696	0.423875	0.174462	2.72165	0.693114	8.49179	3.58304	18.3338	4.19015	44.8413	10.8882
	CD32-29	0.0166241	11.2054	0.0171415	0.360972	0.43799	0.226614	2.56884	1.0382	12.7251	5.42599	30.0681	7.44083	76.6324	18.3274
	CD32-30	0.00905829	12.8587	0.0197477	0.551167	0.968706	0.175746	4.49257	1.30673	16.6124	7.04577	33.8868	7.41682	75.2421	16.5917
	CD32-32	0.0380144	6.28201	0.0148345	0.237319	0.484622	0.182636	1.97639	0.726901	9.65205	4.05023	21.7822	5.77648	65.3881	16.8706
	CD32-34	0.00390203	15.9366	0.0518949	0.624504	0.94685	0.441857	5.64384	1.81201	22.3903	9.02491	46.2374	10.8859	114.978	27.7761
Group 3	CD32-24	0.277941	13.2019	0.0565443	0.39161	0.858121	0.409519	3.06059	0.728611	8.18281	2.76626	10.7861	2.58796	20.8694	4.45175

## Sheet: PlotDat6
Source sheet	Sheet1	10.05	0.447	7	0.387544	6.91045	0.385086	7	0.384416	10.459	0.451547	11.7642	0.484202	11.5948	0.483821	12.8111	0.50982	11.5315	0.483926	10.523	0.462683	11.3299	0.479063	12.509	0.516609	10.1312	0.458168	9.20722	0.430063	11.3005	0.488958	11.2966	0.479926	12.4093	0.500926	10.9321	0.47597	11.9396	0.499304	11.1084	0.478927	11.2293	0.471822
Plot name	Concordia1	11.34	0.477	7	0.387544	7.30973	0.395871	14	0.547499	10.4501	0.453084	11.7584	0.486155	11.5882	0.485672	12.8027	0.51167	11.5227	0.485591	10.5154	0.464225	11.3231	0.480707	12.5001	0.519062	10.123	0.459577	9.20069	0.431708	11.2929	0.491117	11.2875	0.481591	12.3997	0.502591	10.9274	0.477007	11.9332	0.500744	11.1008	0.480592	11.2233	0.473672
Plot Type	1	11.11	0.477	7.1753	0.39229	7.72917	0.40674			10.4236	0.454355	11.7411	0.487858	11.5685	0.487285	12.7774	0.513284	11.4967	0.486968	10.493	0.46557	11.3028	0.482142	12.4737	0.521261	10.099	0.460742	9.18132	0.433142	11.2701	0.492999	11.2606	0.482968	12.3713	0.503968	10.9137	0.477865	11.9142	0.501999	11.0783	0.481969	11.2055	0.475286
1st free col	45	12.19	0.503	7.35445	0.397052	8.16977	0.417693			10.3809	0.455305	11.713	0.489265	11.5363	0.488618	12.7362	0.514617	11.4547	0.487997	10.4563	0.466681	11.2696	0.483327	12.4303	0.523162	10.0602	0.461613	9.14964	0.434327	11.2329	0.494555	11.217	0.483997	12.3254	0.504997	10.8915	0.478506	11.883	0.503036	11.0418	0.482997	11.1763	0.476619
Sigma Level	1	11.13	0.479	7.53752	0.40183	8.63262	0.428732			10.3236	0.455892	11.6746	0.490337	11.4925	0.489634	12.6801	0.515634	11.3986	0.488633	10.4063	0.467528	11.2244	0.48423	12.3708	0.52473	10.0083	0.462151	9.10651	0.43523	11.1822	0.49574	11.1587	0.484633	12.2639	0.505633	10.8619	0.478902	11.8406	0.503826	10.9931	0.483633	11.1366	0.477635
Absolute Errs	TRUE	9.97	0.457	7.7246	0.406624	9.11882	0.439857			10.2544	0.45609	11.6271	0.491046	11.4382	0.490306	12.6106	0.516305	11.3306	0.488847	10.3444	0.468088	11.1685	0.484827	12.2962	0.525932	9.94552	0.462332	9.05311	0.435827	11.1195	0.496524	11.0882	0.484847	12.1896	0.505847	10.826	0.479036	11.788	0.504349	10.9341	0.483847	11.0874	0.478306
Symbol Type	1	10.83	0.473	7.91578	0.411435	9.62957	0.451068			10.1763	0.455891	11.5718	0.491371	11.375	0.490614	12.5296	0.516614	11.254	0.488632	10.2724	0.468345	11.1033	0.485102	12.2081	0.526747	9.87462	0.46215	8.9909	0.436102	11.0464	0.496884	11.0086	0.484632	12.1057	0.505632	10.7855	0.478901	11.7268	0.504589	10.8676	0.483632	11.0301	0.478614
Inverse Plot	FALSE	11.6	0.506	8.11115	0.416262	10.1661	0.462367			10.0927	0.455303	11.5102	0.491304	11.3046	0.490552	12.4394	0.516552	11.1719	0.487995	10.192	0.468293	11.0307	0.485046	12.1081	0.527158	9.79872	0.461611	8.92158	0.436046	10.965	0.49681	10.9234	0.483995	12.0158	0.504995	10.7421	0.478504	11.6586	0.50454	10.7963	0.482995	10.9663	0.478551
Color Plot	TRUE	9.76	0.454	8.3108	0.421106	10.7297	0.473753			10.0072	0.454353	11.4439	0.490847	11.2288	0.490119	12.3424	0.51612	11.0879	0.486965	10.1056	0.467933	10.9526	0.484662	11.9983	0.527158	9.72112	0.46074	8.84702	0.435662	10.8774	0.496306	10.8364	0.482965	11.924	0.503965	10.6978	0.477863	11.5852	0.504204	10.7235	0.481965	10.8977	0.478119
3D plot	FALSE	8.73	0.424	8.51482	0.425966	11.3218	0.485229			9.92351	0.453081	11.3748	0.490013	11.1499	0.489329	12.2412	0.51533	11.0058	0.485587	10.0156	0.467275	10.8712	0.483959	11.8807	0.526745	9.64522	0.459574	8.76928	0.434959	10.7861	0.495384	10.7512	0.481587	11.8341	0.502588	10.6544	0.477004	11.5087	0.50359	10.6522	0.480587	10.8261	0.477328
Linear	FALSE	10.74	0.481	8.72332	0.430843	11.9437	0.496793			9.8454	0.451543	11.3048	0.488823	11.0698	0.488202	12.1386	0.514203	10.9292	0.483921	9.92424	0.466336	10.7886	0.482958	11.7576	0.525929	9.57434	0.458165	8.69046	0.433958	10.6935	0.494069	10.6716	0.479922	11.7502	0.500922	10.6139	0.475966	11.4311	0.502714	10.5857	0.478921	10.7535	0.476202
Data Range	H25:K41	10.88	0.475	8.93638	0.435736	12.597	0.508448			9.77623	0.449807	11.2357	0.487311	10.9908	0.48677	12.0374	0.512771	10.8613	0.482041	9.83416	0.465143	10.7071	0.481685	11.6315	0.524725	9.51158	0.456573	8.61272	0.432685	10.6022	0.492398	10.6012	0.478041	11.6759	0.499041	10.578	0.474794	11.3546	0.5016	10.5268	0.47704	10.682	0.474769
Filled Symbols	FALSE	11.97	0.496	9.15412	0.440647	13.2834	0.520193			9.71902	0.447948	11.1694	0.485518	10.9151	0.485071	11.9404	0.511073	10.8051	0.480027	9.74778	0.463728	10.6291	0.480175	11.5048	0.523156	9.45967	0.454869	8.53818	0.431175	10.5147	0.490416	10.5429	0.476027	11.6145	0.497027	10.5484	0.473539	11.2813	0.500279	10.478	0.475026	10.6133	0.47307
ConcAge	FALSE	10.72	0.4729	9.37662	0.445574	IsoLine	IsoLine			9.67628	0.446048	11.1078	0.483492	10.8447	0.483152	11.8502	0.509154	10.7632	0.477968	9.66747	0.462129	10.5564	0.47847	11.3799	0.521254	9.42088	0.453127	8.46887	0.42947	10.4332	0.488178	10.4994	0.473968	11.5686	0.494969	10.5262	0.472256	11.213	0.498786	10.4416	0.472967	10.5495	0.471152
ConcSwap	FALSE	11.47	0.494	9.604	0.450518					9.64987	0.444189	11.0525	0.481289	10.7815	0.481066	11.7692	0.507067	10.7373	0.475955	9.59541	0.46039	10.4913	0.476615	11.2593	0.519054	9.39692	0.451423	8.40669	0.427615	10.3602	0.485743	10.4725	0.471955	11.5402	0.492955	10.5125	0.471002	11.1518	0.497163	10.4191	0.470954	10.4923	0.469065
1st Symbol-row	1	10.76	0.474	9.83637	0.455479					9.64095	0.442453	11.0051	0.47897	10.7273	0.478868	11.6998	0.50487	10.7285	0.474074	9.53357	0.458559	10.4354	0.474662	11.1453	0.516601	9.38883	0.449832	8.35332	0.425661	10.2975	0.483179	10.4634	0.470074	11.5307	0.491074	10.5079	0.46983	11.0993	0.495454	10.4116	0.469073	10.4432	0.466867
		10.79	0.465	10.0738	0.460457					9.64991	0.440916	10.9668	0.476596	10.6836	0.47662	11.6437	0.502621	10.7373	0.472409	9.48363	0.456685	10.3903	0.472663	11.0402	0.513941	9.39696	0.448423	8.31023	0.423663	10.2469	0.480556	10.4725	0.468409	11.5403	0.489409	10.5126	0.468793	11.0569	0.493705	10.4192	0.467408	10.4035	0.464619
		IsoLine	IsoLine	10.3165	0.465451					9.67635	0.439645	10.9387	0.474234	10.6514	0.474381	11.6025	0.500383	10.7633	0.471032	9.44696	0.45482	10.3571	0.470673	10.946	0.511126	9.42095	0.447258	8.27859	0.421673	10.2098	0.477945	10.4994	0.467032	11.5687	0.488032	10.5263	0.467935	11.0258	0.491965	10.4417	0.466031	10.3744	0.46238
				10.5645	0.470463					9.71913	0.438695	10.9216	0.471947	10.6318	0.472215	11.5773	0.498216	10.8053	0.470003	9.42455	0.453014	10.3369	0.468747	10.8645	0.508212	9.45976	0.446387	8.25927	0.419747	10.1871	0.475417	10.543	0.466003	11.6146	0.487003	10.5485	0.467294	11.0067	0.490279	10.4782	0.465003	10.3566	0.460214
				10.8179	0.475493					9.77636	0.438108	10.9158	0.469798	10.6252	0.470179	11.5689	0.49618	10.8614	0.469367	9.41703	0.451317	10.3301	0.466937	10.7973	0.505255	9.5117	0.445849	8.25278	0.417937	10.1795	0.473042	10.6013	0.465367	11.6761	0.486367	10.5781	0.466898	11.0004	0.488696	10.5269	0.464367	10.3507	0.458178
				11.0768	0.480539					9.84555	0.43791	10.9216	0.467845	10.6318	0.468328	11.5773	0.49433	10.9294	0.469153	9.42459	0.449775	10.3369	0.465293	10.7458	0.502312	9.57448	0.445668	8.25931	0.416292	10.1871	0.470883	10.6718	0.465153	11.7504	0.486153	10.614	0.466764	11.0068	0.487256	10.5859	0.464153	10.3567	0.456328
				11.3415	0.485602					9.92368	0.438109	10.9389	0.466142	10.6515	0.466715	11.6026	0.492716	11.006	0.469368	9.44702	0.44843	10.3572	0.463858	10.7108	0.499441	9.64538	0.44585	8.27868	0.414858	10.2099	0.469001	10.7514	0.465368	11.8343	0.486368	10.6545	0.466899	11.0258	0.486001	10.6524	0.464368	10.3745	0.454714
				11.6119	0.490683					10.0073	0.438697	10.967	0.464735	10.6837	0.465382	11.6438	0.491383	11.0881	0.470005	9.48373	0.447319	10.3904	0.462673	10.6932	0.496698	9.72128	0.446389	8.31036	0.413673	10.2471	0.467445	10.8366	0.466005	11.9242	0.487005	10.6979	0.467296	11.057	0.484964	10.7237	0.465005	10.4037	0.453381
				11.8883	0.495782					10.0928	0.439647	11.0054	0.463663	10.7275	0.464366	11.6999	0.490366	11.1721	0.471035	9.53369	0.446472	10.4356	0.46177	10.6932	0.494135	9.79888	0.44726	8.35349	0.41277	10.2978	0.46626	10.9236	0.467035	12.016	0.488035	10.7422	0.467937	11.0994	0.484174	10.7965	0.466035	10.4434	0.452365
				12.1707	0.500897					10.1765	0.440919	11.0529	0.462954	10.7818	0.463694	11.7694	0.489695	11.2542	0.472413	9.59556	0.445912	10.4915	0.461173	10.7109	0.491804	9.87478	0.448426	8.40689	0.412173	10.3605	0.465476	11.0088	0.468413	12.1059	0.489412	10.7856	0.468796	11.152	0.483651	10.8678	0.467413	10.4926	0.451694
				12.4593	0.50603					10.2546	0.442457	11.1082	0.462629	10.845	0.463386	11.8504	0.489386	11.3308	0.474079	9.66764	0.445655	10.5567	0.460898	10.7459	0.489749	9.94566	0.449835	8.4691	0.411898	10.4336	0.465116	11.0884	0.470078	12.1898	0.491078	10.8261	0.469834	11.2132	0.483411	10.9343	0.469079	10.5499	0.451386
				12.7542	0.511181					10.3238	0.444193	11.1698	0.462696	10.9154	0.463448	11.9406	0.489448	11.3987	0.475959	9.74797	0.445707	10.6293	0.460954	10.7975	0.48801	10.0084	0.451427	8.53842	0.411954	10.515	0.46519	11.1588	0.471959	12.2641	0.492959	10.862	0.471006	11.2814	0.48346	10.9932	0.47096	10.6137	0.451449
				13.0556	0.516349					10.381	0.446052	11.2361	0.463153	10.9912	0.463881	12.0376	0.48988	11.4549	0.477973	9.83435	0.446067	10.7074	0.461338	10.8647	0.486622	10.0603	0.453131	8.61298	0.412338	10.6026	0.465694	11.2171	0.473973	12.3255	0.494973	10.8916	0.472261	11.3548	0.483796	11.042	0.472974	10.6823	0.451881
				13.3636	0.521535					10.4237	0.447952	11.3052	0.463987	11.0701	0.464671	12.1388	0.49067	11.4968	0.480032	9.92444	0.446725	10.7888	0.462041	10.9463	0.48561	10.0991	0.454873	8.69072	0.413041	10.6939	0.466616	11.2606	0.476032	12.3714	0.497031	10.9138	0.473544	11.4313	0.48441	11.0784	0.475033	10.7539	0.452672
				13.6784	0.526739					10.4501	0.449811	11.3752	0.465177	11.1502	0.465798	12.2414	0.491797	11.5227	0.482045	10.0158	0.447664	10.8714	0.463042	11.0405	0.484996	10.1231	0.456577	8.76954	0.414042	10.7865	0.467931	11.2875	0.478045	12.3998	0.499045	10.9275	0.474798	11.5089	0.485286	11.1009	0.477046	10.8265	0.453798
				14	0.531961					10.459	0.451547	11.4443	0.466689	11.2292	0.46723	12.3426	0.493229	11.5315	0.483926	10.1058	0.448857	10.9529	0.464315	11.1457	0.48479	10.1312	0.458168	8.84728	0.415315	10.8778	0.469602	11.2966	0.479926	12.4093	0.500926	10.9321	0.47597	11.5854	0.4864	11.1084	0.478927	10.898	0.455231
				14	0.531961							11.5106	0.468482	11.3049	0.468929	12.4396	0.494927			10.1922	0.450272	11.0309	0.465825	11.2597	0.484997			8.92182	0.416825	10.9653	0.471584							11.6587	0.487721			10.9667	0.45693
				IsoLine	IsoLine							11.5722	0.470508	11.3753	0.470848	12.5298	0.496846			10.2725	0.451871	11.1036	0.46753	11.3803	0.485613			8.99113	0.41853	11.0468	0.473822							11.727	0.489214			11.0305	0.458848
												11.6275	0.472711	11.4385	0.472934	12.6108	0.498933			10.3446	0.45361	11.1687	0.469385	11.5052	0.486626			9.05331	0.420385	11.1198	0.476257							11.7882	0.490837			11.0877	0.460935
												11.6749	0.47503	11.4927	0.475132	12.6802	0.50113			10.4064	0.455441	11.2246	0.471338	11.6319	0.488016			9.10668	0.422339	11.1825	0.478821							11.8407	0.492546			11.1368	0.463133
												11.7132	0.477404	11.5364	0.47738	12.7363	0.503379			10.4564	0.457315	11.2697	0.473337	11.7581	0.489756			9.14977	0.424337	11.2331	0.481444							11.8831	0.494295			11.1765	0.465381
												11.7413	0.479766	11.5686	0.479619	12.7775	0.505617			10.493	0.45918	11.3029	0.475327	11.8811	0.491812			9.18141	0.426327	11.2702	0.484055							11.9142	0.496035			11.2056	0.46762
												11.7584	0.482053	11.5882	0.481785	12.8027	0.507784			10.5154	0.460986	11.3231	0.477253	11.9987	0.494144			9.20073	0.428253	11.2929	0.486583							11.9333	0.497721			11.2234	0.469786
												11.7642	0.484202	11.5948	0.483821	12.8111	0.50982			10.523	0.462683	11.3299	0.479063	12.1085	0.496707			9.20722	0.430063	11.3005	0.488958							11.9396	0.499304			11.2293	0.471822
																								12.2084	0.499451
																								12.2965	0.502322
																								12.371	0.505265
																								12.4305	0.508222
																								12.4738	0.511136
																								12.5002	0.51395
																								12.509	0.516609

## Sheet: PlotDat7
Source sheet	95	4.85	0.322	3.12342	0.25	2.97009	0.242562	2.10911	0.25	5.0924	0.32655	5.4545	0.336684	5.1839	0.328168	5.09512	0.318976	5.38662	0.332547	5.203	0.327789	5.44845	0.324168	7.15207	0.395822	6.47117	0.355168	5.663	0.331789	6.04935	0.349926	9.04117	0.433547	8.45722	0.415063	9.93965	0.436304	10.4499	0.469063	14.509	0.563714	11.0563	0.476305	10.2332	0.44961	11.4872	0.484201	11.623	0.481062
Plot name	Concordia3	5	0.331	3.12342	0.25	3.38099	0.261987	17	0.635672	5.08254	0.328583	5.44454	0.338605	5.16792	0.330032	5.08436	0.320619	5.36972	0.33458	5.1907	0.329484	5.43431	0.326032	7.14194	0.398127	6.45611	0.357032	5.6507	0.333484	6.03973	0.351591	9.02611	0.43558	8.44676	0.417112	9.92936	0.438098	10.439	0.471112	14.4891	0.56666	11.0479	0.478099	10.215	0.453197	11.4768	0.486635	11.6109	0.483112
Plot Type	1	4.79	0.324	3.33837	0.260045	3.83441	0.281716			5.05384	0.330082	5.41515	0.340194	5.12133	0.331407	5.05299	0.321832	5.32044	0.33608	5.15485	0.330734	5.39309	0.327407	7.11205	0.400034	6.41221	0.358407	5.61485	0.334734	6.01132	0.352968	8.9822	0.437081	8.41591	0.418807	9.899	0.439581	10.4067	0.472807	14.4303	0.569097	11.0229	0.479582	10.1611	0.456163	11.4459	0.488647	11.5751	0.484807
1st free col	55	4.83	0.3153	3.56453	0.270172	4.33477	0.301754			5.00863	0.330927	5.36762	0.341381	5.04789	0.332182	5.00355	0.322515	5.24276	0.336926	5.09836	0.331438	5.32812	0.328182	7.06372	0.401458	6.343	0.359182	5.55836	0.335438	5.96538	0.353997	8.91299	0.437926	8.366	0.420073	9.84989	0.440689	10.3544	0.474073	14.3353	0.570917	10.9825	0.480689	10.074	0.458379	11.396	0.49015	11.5173	0.486073
Sigma Level	1	4.97	0.328	3.80248	0.280379	4.8869	0.322105			4.95056	0.331048	5.30403	0.342115	4.95356	0.332295	4.94006	0.322614	5.14299	0.337049	5.0258	0.33154	5.24467	0.328295	6.99906	0.402338	6.25412	0.359295	5.4858	0.33554	5.90391	0.354633	8.8241	0.438049	8.29922	0.420856	9.78418	0.441374	10.2844	0.474856	14.2081	0.572042	10.9284	0.481374	9.95737	0.459748	11.3292	0.491079	11.4399	0.486856
Absolute Errs	TRUE	4.9	0.324	4.05284	0.290669	5.49618	0.342774			4.88435	0.330437	5.22714	0.342362	4.84598	0.331735	4.86764	0.32212	5.02921	0.336438	4.94304	0.331032	5.1495	0.327735	6.92088	0.402635	6.15274	0.358735	5.40304	0.335032	5.82959	0.354847	8.72273	0.437438	8.21849	0.42112	9.70473	0.441605	10.1999	0.47512	14.0544	0.572422	10.8631	0.481605	9.81642	0.46021	11.2484	0.491392	11.3464	0.48712
Symbol Type	1	5.1	0.32	4.31624	0.301041	6.16853	0.363766			4.81536	0.329142	5.14033	0.342113	4.73387	0.330549	4.79218	0.321074	4.91062	0.335144	4.8568	0.329953	5.05033	0.326548	6.83262	0.402336	6.0471	0.357549	5.3168	0.333953	5.74567	0.354632	8.61708	0.436144	8.12734	0.420854	9.61503	0.441373	10.1044	0.474854	13.8808	0.572041	10.7893	0.481372	9.65726	0.459745	11.1573	0.491077	11.2408	0.486855
Inverse Plot	FALSE	6.69	0.389	4.59338	0.311497	6.91045	0.385086			4.74917	0.327268	5.04739	0.341379	4.6263	0.328832	4.71978	0.31956	4.79685	0.333271	4.77406	0.328392	4.95517	0.324832	6.73813	0.401454	5.94574	0.355832	5.23406	0.332392	5.65583	0.353995	8.51572	0.434271	8.02975	0.420071	9.51899	0.440687	10.0021	0.474071	13.6949	0.570915	10.7103	0.480687	9.48687	0.458374	11.0597	0.490146	11.1277	0.486071
Color Plot	TRUE	6.1	0.351	4.88497	0.322036	7.72917	0.40674			4.69115	0.324968	4.95237	0.340191	4.53199	0.326724	4.65631	0.317701	4.69711	0.330971	4.70152	0.326476	4.87175	0.322723	6.64153	0.400028	5.85687	0.353724	5.16152	0.330476	5.56398	0.352965	8.42686	0.431971	7.92998	0.418803	9.42081	0.439578	9.89761	0.472803	13.5048	0.569093	10.6295	0.479578	9.31267	0.456156	10.9599	0.48864	11.0121	0.484804
3D plot	FALSE	5.36	0.328	5.19175	0.332661	8.63262	0.428732			4.646	0.322427	4.85944	0.338601	4.45859	0.324395	4.60692	0.315647	4.61947	0.328431	4.64506	0.324358	4.80682	0.320394	6.54705	0.39812	5.78771	0.351395	5.10506	0.328358	5.47414	0.351588	8.3577	0.42943	7.8324	0.417107	9.32477	0.438094	9.79539	0.471107	13.319	0.566656	10.5505	0.478093	9.14229	0.453188	10.8624	0.486626	10.899	0.483108
Linear	FALSE	5.61	0.345	5.51453	0.34337	9.62957	0.451068			4.61738	0.319852	4.77265	0.336679	4.41204	0.322034	4.57559	0.313565	4.57023	0.325855	4.60925	0.322212	4.76564	0.318034	6.45881	0.395813	5.74384	0.349034	5.06925	0.326212	5.39024	0.349922	8.31384	0.426855	7.74127	0.415057	9.23509	0.4363	9.69992	0.469057	13.1454	0.563709	10.4767	0.476299	8.98318	0.4496	10.7712	0.484191	10.7934	0.481058
Data Range	H3:K24	8.67	0.429	5.85413	0.354166	10.7297	0.473753			4.6076	0.31745	4.69579	0.334508	4.3961	0.319832	4.56488	0.311624	4.55338	0.323453	4.597	0.320211	4.75155	0.315832	6.38068	0.393209	5.72883	0.346832	5.057	0.324211	5.31595	0.348041	8.29883	0.424453	7.66058	0.412742	9.15567	0.434275	9.61538	0.466742	12.9917	0.560381	10.4114	0.474274	8.84228	0.445549	10.6905	0.481442	10.6999	0.478743
Filled Symbols	FALSE	7.98	0.409	6.21144	0.365049	11.9437	0.496793			4.61746	0.315417	4.63223	0.332185	4.41208	0.317968	4.57564	0.309981	4.57028	0.32142	4.6093	0.318516	4.76569	0.313968	6.31607	0.39042	5.74389	0.344968	5.0693	0.322516	5.25451	0.346027	8.31389	0.42242	7.59384	0.410264	9.08999	0.432106	9.54546	0.464264	12.8645	0.556818	10.3574	0.472105	8.72576	0.441211	10.6238	0.478499	10.6226	0.476264
ConcAge	FALSE	9.47	0.431	6.58737	0.376019	13.2834	0.520193			4.64616	0.313918	4.58475	0.329809	4.45867	0.316593	4.60701	0.308768	4.61956	0.31992	4.64515	0.317266	4.80691	0.312593	6.26781	0.38757	5.78779	0.343593	5.10515	0.321266	5.2086	0.343969	8.3578	0.420919	7.54398	0.40773	9.04091	0.429889	9.49323	0.46173	12.7695	0.553176	10.317	0.469888	8.6387	0.436777	10.574	0.47549	10.5648	0.473731
ConcSwap	FALSE	9.95	0.463	6.9829	0.387077	14.7617	0.543959			4.69137	0.313073	4.55541	0.327486	4.53211	0.315818	4.65645	0.308085	4.69724	0.319074	4.70164	0.316562	4.87188	0.311818	6.23799	0.384782	5.857	0.342818	5.16164	0.320562	5.18023	0.341955	8.42701	0.420074	7.51318	0.405252	9.0106	0.427721	9.46095	0.459252	12.7108	0.549614	10.2921	0.46772	8.58492	0.43244	10.5432	0.472547	10.5291	0.471252
1st Symbol-row	1	13.6	0.555	7.39905	0.398224	16.393	0.568097			4.74944	0.312952	4.5455	0.325316	4.62644	0.315705	4.71994	0.307986	4.79701	0.318951	4.7742	0.31646	4.95533	0.311705	6.22793	0.382178	5.94588	0.342705	5.2342	0.32046	5.17065	0.340074	8.5159	0.419951	7.50278	0.402937	9.00035	0.425696	9.45005	0.456937	12.691	0.546286	10.2837	0.465695	8.56676	0.42839	10.5328	0.469799	10.517	0.468938
		10.67	0.471	7.8369	0.40946	IsoLine	IsoLine			4.81565	0.313563	4.55546	0.323395	4.73402	0.316265	4.79236	0.30848	4.91079	0.319562	4.85696	0.316968	5.0505	0.312265	6.23806	0.379873	6.04726	0.343265	5.31696	0.320968	5.18027	0.338409	8.61727	0.420562	7.51324	0.400888	9.01064	0.423902	9.46101	0.454888	12.7109	0.54334	10.2921	0.463901	8.58501	0.424803	10.5432	0.467365	10.5291	0.466888
		9.4	0.439	8.29757	0.420787					4.88464	0.314858	4.58485	0.321806	4.84613	0.317451	4.86782	0.309526	5.02938	0.320856	4.9432	0.318047	5.14967	0.313452	6.26795	0.377966	6.1529	0.344451	5.4032	0.322047	5.20868	0.337032	8.72292	0.421856	7.54409	0.399193	9.041	0.422419	9.49333	0.453193	12.7697	0.540903	10.3171	0.462418	8.63889	0.421837	10.5741	0.465353	10.5649	0.465193
		11.01	0.477	8.78225	0.432205					4.95083	0.316732	4.63238	0.320619	4.9537	0.319168	4.94022	0.31104	5.14315	0.322729	5.02594	0.319608	5.24483	0.315168	6.31628	0.376542	6.25426	0.346168	5.48594	0.323608	5.25462	0.336003	8.82428	0.423729	7.594	0.397927	9.09011	0.421311	9.54561	0.451927	12.8647	0.539083	10.3575	0.461311	8.72603	0.419621	10.624	0.46385	10.6227	0.463927
		11.07	0.475	9.2922	0.443715					5.00885	0.319032	4.69597	0.319885	5.04801	0.321276	5.00369	0.312899	5.24289	0.325029	5.09848	0.321524	5.32825	0.317277	6.38094	0.375662	6.34313	0.348276	5.55848	0.325524	5.31609	0.335367	8.91314	0.426029	7.66078	0.397144	9.15582	0.420626	9.61557	0.451144	12.9919	0.537958	10.4116	0.460626	8.84263	0.418252	10.6908	0.462921	10.7001	0.463144
		11.1	0.466	9.82873	0.455317					5.054	0.321573	4.77286	0.319638	5.12141	0.323605	5.05308	0.314953	5.32053	0.327569	5.15494	0.323642	5.39318	0.319606	6.45912	0.375365	6.41229	0.350605	5.61494	0.327642	5.39041	0.335153	8.9823	0.42857	7.74151	0.39688	9.23527	0.420395	9.70014	0.45088	13.1456	0.537578	10.4769	0.460395	8.98358	0.41779	10.7716	0.462608	10.7936	0.46288
		11	0.475	10.3932	0.467013					5.08262	0.324148	4.85967	0.319887	5.16796	0.325966	5.08441	0.317035	5.36977	0.330145	5.19075	0.325788	5.43436	0.321966	6.54738	0.375664	6.45616	0.352966	5.65075	0.329788	5.47433	0.335368	9.02616	0.431145	7.83266	0.397146	9.32497	0.420627	9.79563	0.451146	13.3192	0.537959	10.5507	0.460628	9.14274	0.418255	10.8627	0.462923	10.8992	0.463145
		IsoLine	IsoLine	10.9872	0.478802					5.0924	0.32655	4.95261	0.320621	5.1839	0.328168	5.09512	0.318976	5.38662	0.332547	5.203	0.327789	5.44845	0.324168	6.64187	0.376546	6.47117	0.355168	5.663	0.331789	5.56417	0.336005	9.04117	0.433547	7.93025	0.397929	9.42101	0.421313	9.89787	0.451929	13.5051	0.539085	10.6297	0.461313	9.31313	0.419626	10.9603	0.463854	11.0123	0.463929
				11.6121	0.490686							5.04763	0.321809											6.73847	0.377972					5.65602	0.337035			8.03002	0.399197	9.51919	0.422422	10.0024	0.453197	13.6952	0.540907	10.7105	0.462422	9.48733	0.421844	11.0601	0.46536	11.1279	0.465196
				12.2695	0.502666							5.14056	0.323399											6.83295	0.37988					5.74586	0.338412			8.1276	0.400893	9.61523	0.423906	10.1046	0.454893	13.881	0.543344	10.7895	0.463907	9.65771	0.424812	11.1576	0.467374	11.241	0.466892
				12.9613	0.514742							5.22735	0.325321											6.92119	0.382187					5.82976	0.340078			8.21873	0.402943	9.70491	0.4257	10.2001	0.456943	14.0546	0.546291	10.8633	0.465701	9.81682	0.4284	11.2488	0.469809	11.3466	0.468942
				13.6891	0.526915							5.30421	0.327492											6.99932	0.384791					5.90405	0.341959			8.29942	0.405258	9.78433	0.427725	10.2846	0.459258	14.2083	0.549619	10.9286	0.467726	9.95772	0.432451	11.3295	0.472558	11.4401	0.471257
				14.4548	0.539186							5.36777	0.329815											7.06393	0.38758					5.96549	0.343973			8.36616	0.407736	9.85001	0.429894	10.3545	0.461736	14.3355	0.553182	10.9826	0.469895	10.0742	0.436789	11.3962	0.475501	11.5174	0.473736
				15.2605	0.551555							5.41525	0.332191											7.11219	0.39043					6.0114	0.346031			8.41602	0.41027	9.89909	0.432111	10.4068	0.46427	14.4305	0.556824	11.023	0.472112	10.1613	0.441223	11.446	0.47851	11.5752	0.476269
				16.1081	0.564024							5.44459	0.334514											7.14201	0.393218					6.03977	0.348045			8.44682	0.412748	9.9294	0.434279	10.439	0.466748	14.4892	0.560386	11.0479	0.47428	10.2151	0.44556	11.4768	0.481453	11.6109	0.478748
				17	0.576593							5.4545	0.336684											7.15207	0.395822					6.04935	0.349926			8.45722	0.415063	9.93965	0.436304	10.4499	0.469063	14.509	0.563714	11.0563	0.476305	10.2332	0.44961	11.4872	0.484201	11.623	0.481062
				17	0.576593
				IsoLine	IsoLine
[truncated: 4 more columns]

## Sheet: PlotDat8
Source sheet	95	0.3	1837.44	1	1842	34
Plot name	Average3	6.7	1837.44	2	1832	76
Plot Type	15			3	1766	74
1st free col	8			4	1856	43
Sigma Level	1			5	1864	73
Absolute Errs	TRUE			6	1824	52
Symbol Type	1			IsoLine	IsoLine	IsoLine	IsoLine
Inverse Plot	FALSE
Color Plot	TRUE
3D plot	FALSE
Linear	FALSE
Data Range	O3:P8
Filled Symbols	FALSE
ConcAge	FALSE
ConcSwap	FALSE
1st Symbol-row	1

## Sheet: PlotDat9
Source sheet	95	4.85	0.322	4.16146	0.295	4.12869	0.293702	4.62624	0.295	5.0924	0.32655	5.4545	0.336684	5.1839	0.328168	5.09512	0.318976	5.38662	0.332547	5.203	0.327789
Plot name	Concordia4	5	0.331	4.16146	0.295	4.23072	0.297721	5.16581	0.355	5.09002	0.327601	5.45006	0.337998	5.18005	0.329131	5.09253	0.319826	5.38255	0.333598	5.20004	0.328665
Plot Type	1	4.79	0.324	4.21289	0.297024	4.33477	0.301754			5.08297	0.328543	5.43686	0.339176	5.16862	0.329995	5.08483	0.320587	5.37046	0.33454	5.19124	0.32945
1st free col	23	4.83	0.3153	4.26484	0.299051	4.44089	0.305799			5.07138	0.329357	5.41515	0.340194	5.14981	0.330742	5.07217	0.321246	5.35057	0.335355	5.17677	0.330129
Sigma Level	1	4.97	0.328	4.3173	0.301082	4.54912	0.309856			5.05549	0.330029	5.38537	0.341034	5.124	0.331358	5.05479	0.321789	5.32327	0.336027	5.15691	0.330689
Absolute Errs	TRUE	4.9	0.324	4.37028	0.303115	4.6595	0.313927			5.03559	0.330544	5.34809	0.341678	5.09169	0.33183	5.03304	0.322205	5.2891	0.336542	5.13206	0.331119
Symbol Type	1	IsoLine	IsoLine	4.4238	0.305152	4.77208	0.318009			5.01209	0.330892	5.30403	0.342115	5.05351	0.332151	5.00734	0.322488	5.24871	0.336892	5.10268	0.33141
Inverse Plot	FALSE			4.47784	0.307192	4.8869	0.322105			4.98542	0.331068	5.25405	0.342335	5.0102	0.332312	4.97818	0.32263	5.2029	0.337068	5.06937	0.331557
Color Plot	TRUE			4.53242	0.309235	5.00401	0.326213			4.95613	0.331067	5.19913	0.342335	4.9626	0.332312	4.94614	0.32263	5.15256	0.337068	5.03275	0.331556
3D plot	FALSE			4.58755	0.311281	5.12344	0.330334			4.92476	0.33089	5.14033	0.342113	4.91165	0.33215	4.91184	0.322487	5.09866	0.336891	4.99355	0.331409
Linear	FALSE			4.64323	0.313331	5.24525	0.334468			4.89195	0.33054	5.0788	0.341676	4.85832	0.331829	4.87595	0.322204	5.04226	0.336541	4.95253	0.331117
Data Range	H3:K8			4.69946	0.315383	5.36948	0.338614			4.85831	0.330023	5.01574	0.341031	4.80367	0.331356	4.83916	0.321786	4.98445	0.336025	4.91049	0.330687
Filled Symbols	FALSE			4.75625	0.317439	5.49618	0.342774			4.82452	0.329351	4.95237	0.340191	4.74875	0.33074	4.8022	0.321243	4.92637	0.335353	4.86825	0.330127
ConcAge	FALSE			4.81361	0.319498	5.62541	0.346946			4.79122	0.328535	4.88993	0.339171	4.69463	0.329993	4.76578	0.320584	4.86913	0.334537	4.82662	0.329448
ConcSwap	FALSE			4.87154	0.321561	5.7572	0.351132			4.75906	0.327592	4.82963	0.337993	4.64237	0.329129	4.7306	0.319822	4.81385	0.333595	4.78642	0.328662
1st Symbol-row	1			4.93005	0.323626	IsoLine	IsoLine			4.72867	0.32654	4.77265	0.336679	4.59299	0.328165	4.69736	0.318972	4.76161	0.332543	4.74843	0.327786
				4.98914	0.325695					4.70065	0.3254	4.72009	0.335254	4.54743	0.32712	4.6667	0.31805	4.71343	0.331403	4.71339	0.326836
				5.04882	0.327767					4.67553	0.324194	4.67298	0.333746	4.5066	0.326014	4.63923	0.317075	4.67025	0.330197	4.68198	0.325831
				5.10909	0.329842					4.65381	0.322945	4.63223	0.332185	4.47129	0.324869	4.61546	0.316066	4.6329	0.328948	4.65482	0.32479
				5.16996	0.331921					4.63591	0.321677	4.59865	0.3306	4.44217	0.323708	4.59587	0.315041	4.6021	0.327681	4.63243	0.323734
				5.23144	0.334003					4.62217	0.320416	4.57287	0.329024	4.41983	0.322551	4.58084	0.314022	4.57847	0.32642	4.61525	0.322683
				5.29354	0.336088					4.61287	0.319186	4.55541	0.327486	4.4047	0.321424	4.57065	0.313027	4.56246	0.325189	4.60361	0.321657
				5.35625	0.338176					4.60818	0.31801	4.5466	0.326016	4.39706	0.320346	4.56552	0.312077	4.55439	0.324014	4.59774	0.320678
				5.41959	0.340267					4.6082	0.316912	4.54662	0.324644	4.39707	0.319339	4.56553	0.311189	4.5544	0.322915	4.59775	0.319762
				5.48355	0.342362					4.61293	0.315914	4.55546	0.323395	4.40473	0.318423	4.57069	0.310382	4.5625	0.321916	4.60364	0.31893
				5.54816	0.34446					4.62227	0.315033	4.57296	0.322294	4.41988	0.317616	4.5809	0.30967	4.57853	0.321036	4.6153	0.318196
				5.61341	0.346562					4.63604	0.314288	4.59876	0.321363	4.44225	0.316933	4.59595	0.309068	4.60219	0.32029	4.63251	0.317575
				5.67931	0.348666					4.65398	0.313694	4.63238	0.320619	4.47138	0.316387	4.61556	0.308587	4.633	0.319695	4.65492	0.317079
				5.74586	0.350774					4.67574	0.313261	4.67315	0.320077	4.50671	0.31599	4.63935	0.308236	4.67037	0.319262	4.6821	0.316718
				5.81308	0.352885					4.70088	0.312998	4.72028	0.319748	4.54755	0.315748	4.66684	0.308023	4.71357	0.318998	4.71352	0.316498
				5.88097	0.355					4.72893	0.31291	4.77286	0.319638	4.59312	0.315668	4.69752	0.307952	4.76176	0.31891	4.74857	0.316425
				5.88097	0.355					4.75933	0.312999	4.82986	0.319749	4.64251	0.315749	4.73077	0.308024	4.81401	0.318999	4.78657	0.316499
				IsoLine	IsoLine					4.7915	0.313264	4.89017	0.320079	4.69478	0.315991	4.76595	0.308238	4.86929	0.319263	4.82678	0.316719
										4.82481	0.313698	4.95261	0.320621	4.7489	0.316389	4.80237	0.308589	4.92654	0.319697	4.86841	0.317081
										4.85861	0.314294	5.01598	0.321366	4.80382	0.316935	4.83934	0.30907	4.98463	0.320292	4.91066	0.317577
										4.89224	0.31504	5.07904	0.322298	4.85847	0.317618	4.87612	0.309673	5.04243	0.321038	4.9527	0.318199
										4.92505	0.315922	5.14056	0.323399	4.91179	0.318426	4.91201	0.310385	5.09882	0.321919	4.99371	0.318933
										4.95639	0.316922	5.19935	0.324649	4.96274	0.319342	4.9463	0.311193	5.15271	0.322919	5.0329	0.319766
										4.98567	0.31802	5.25425	0.326022	5.01033	0.320349	4.97833	0.312081	5.20304	0.324017	5.0695	0.320681
										5.01231	0.319196	5.30421	0.327492	5.05362	0.321427	5.00747	0.313032	5.24884	0.325193	5.10281	0.321661
										5.03578	0.320427	5.34824	0.32903	5.09179	0.322555	5.03315	0.314026	5.28921	0.326423	5.13216	0.322687
										5.05564	0.321688	5.3855	0.330607	5.12408	0.323711	5.05488	0.315046	5.32336	0.327685	5.157	0.323738
										5.0715	0.322956	5.41525	0.332191	5.14987	0.324873	5.07224	0.31607	5.35064	0.328952	5.17684	0.324794
										5.08305	0.324204	5.43692	0.333752	5.16866	0.326017	5.08488	0.31708	5.37051	0.330201	5.19128	0.325835
										5.09006	0.32541	5.45009	0.335259	5.18007	0.327123	5.09255	0.318055	5.38258	0.331407	5.20006	0.32684
										5.0924	0.32655	5.4545	0.336684	5.1839	0.328168	5.09512	0.318976	5.38662	0.332547	5.203	0.327789
